# Supplementary figures and images for: Removing unwanted variation with CytofRUV to integrate multiple CyTOF datasets
Source: eLife journal article supplement (doi:10.7554/elife.59630), 2020-09-07

A

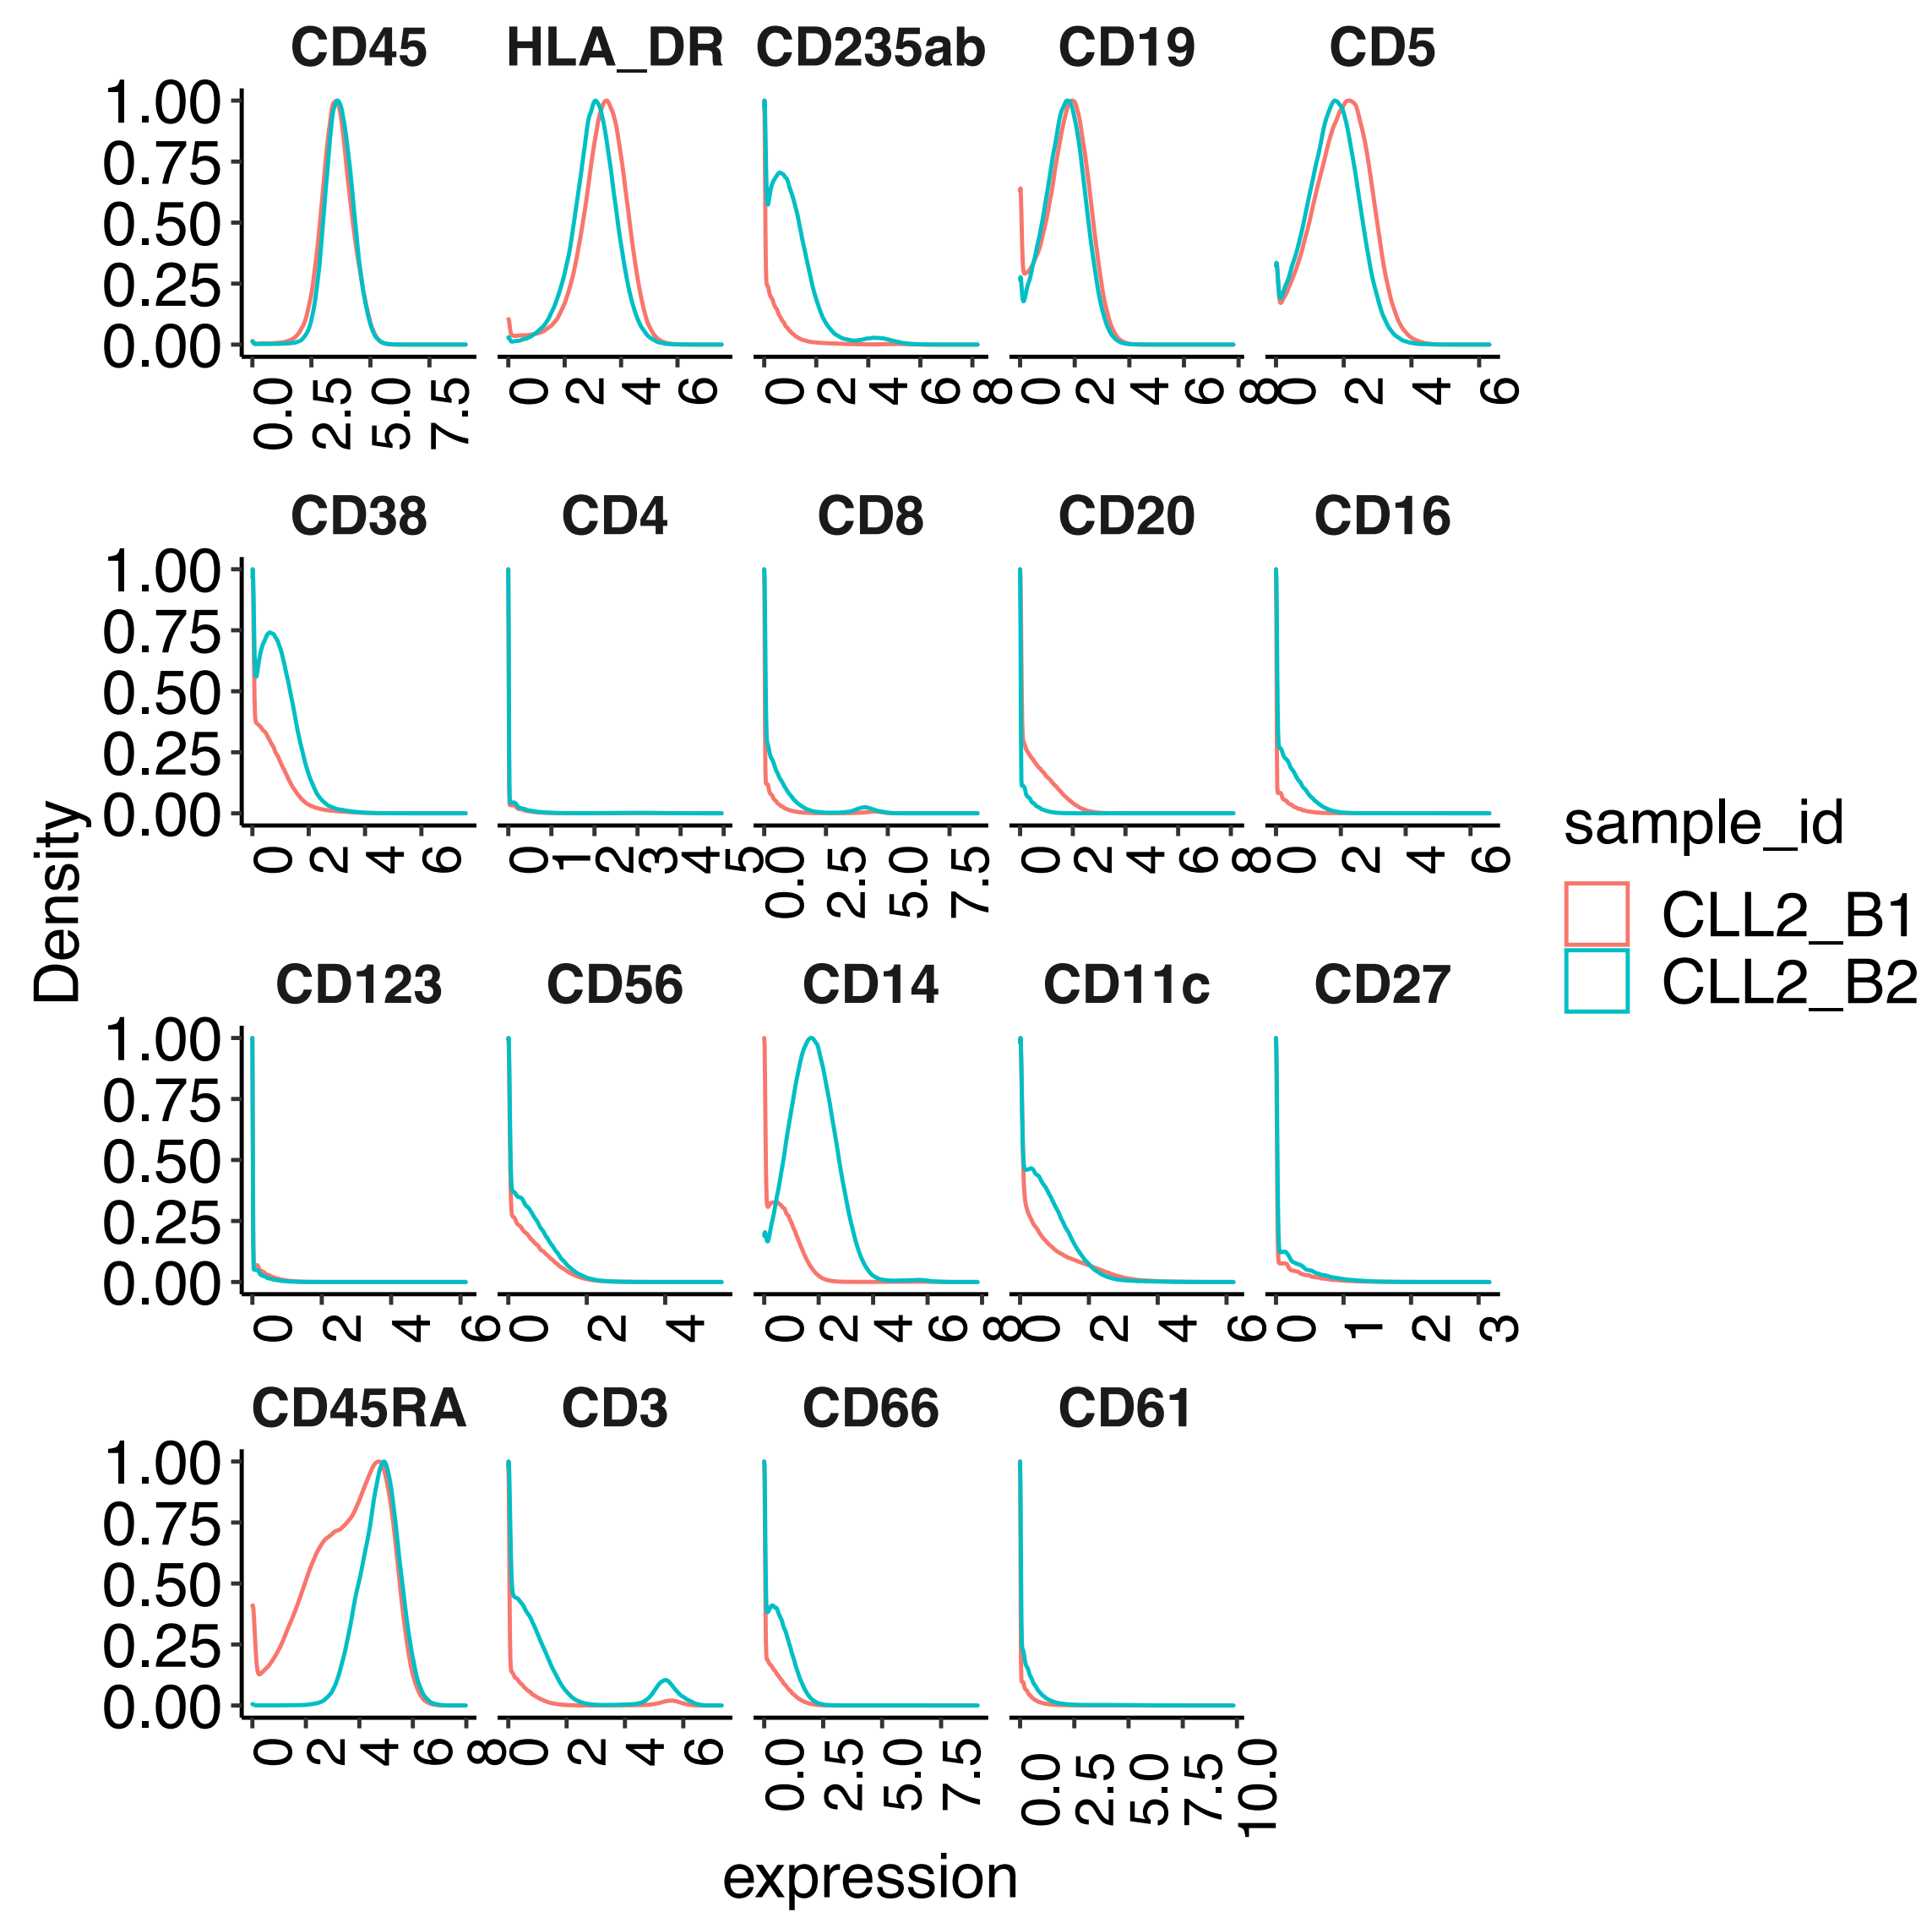

C

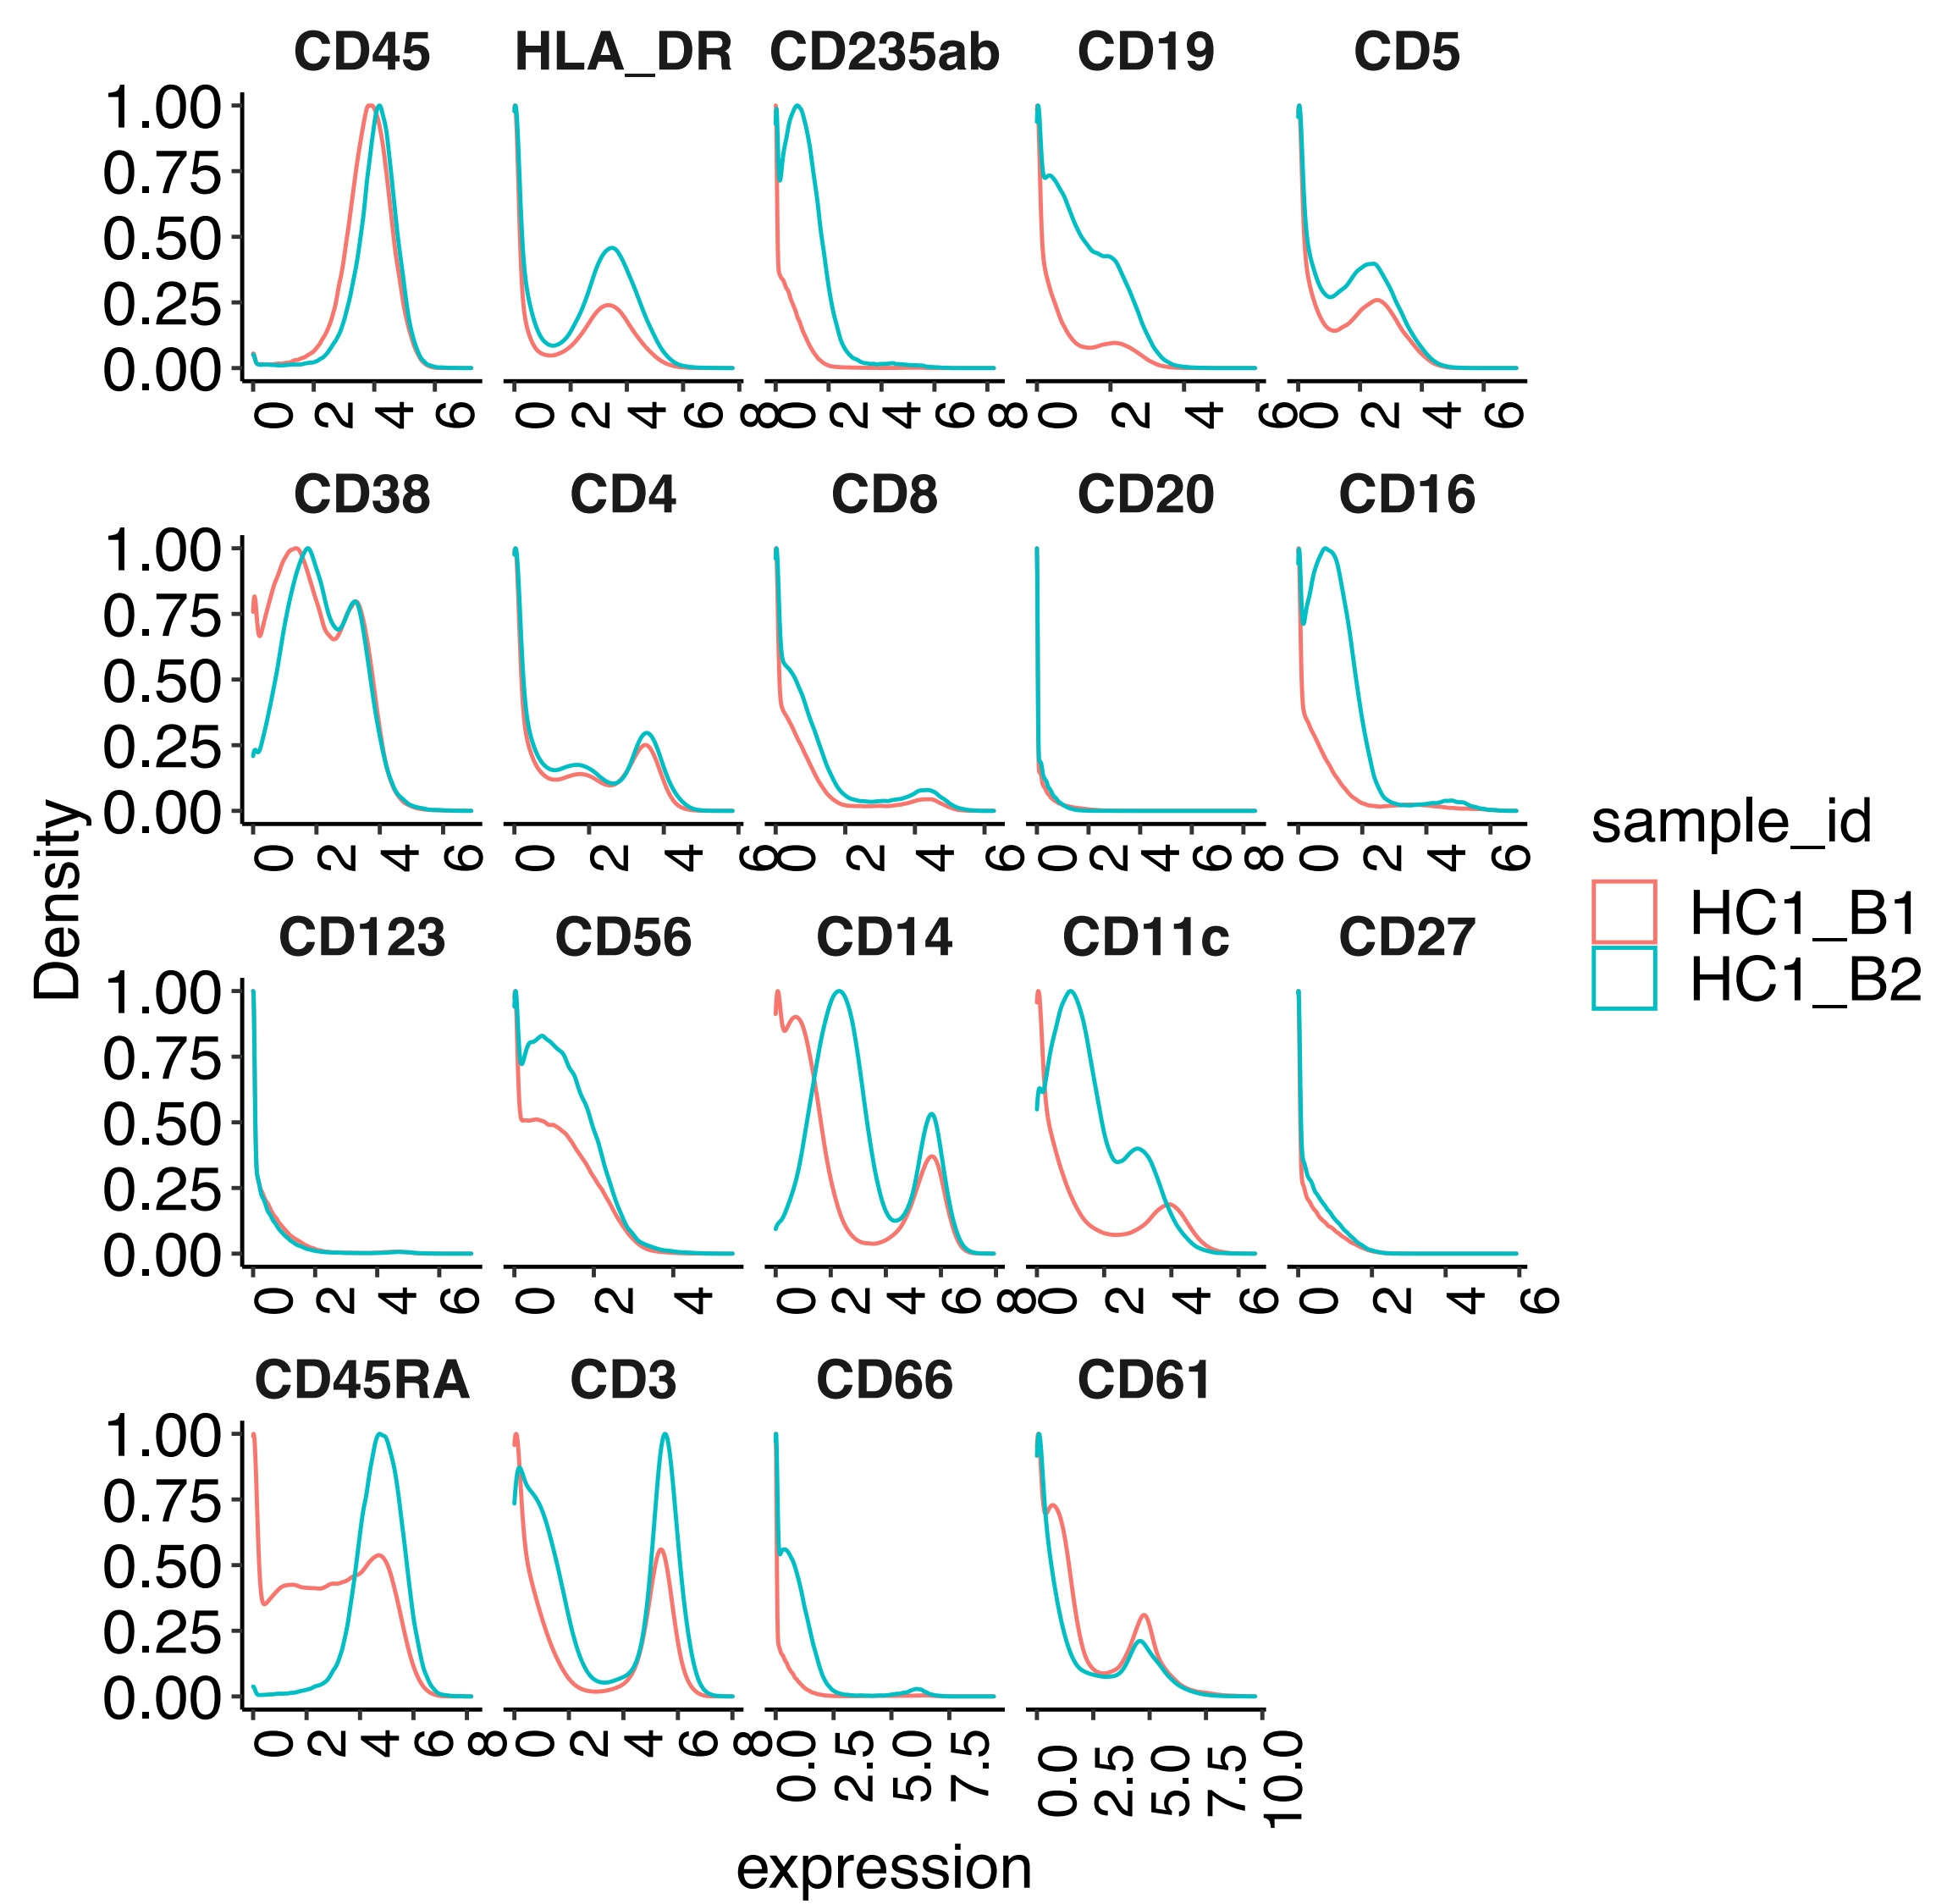

B

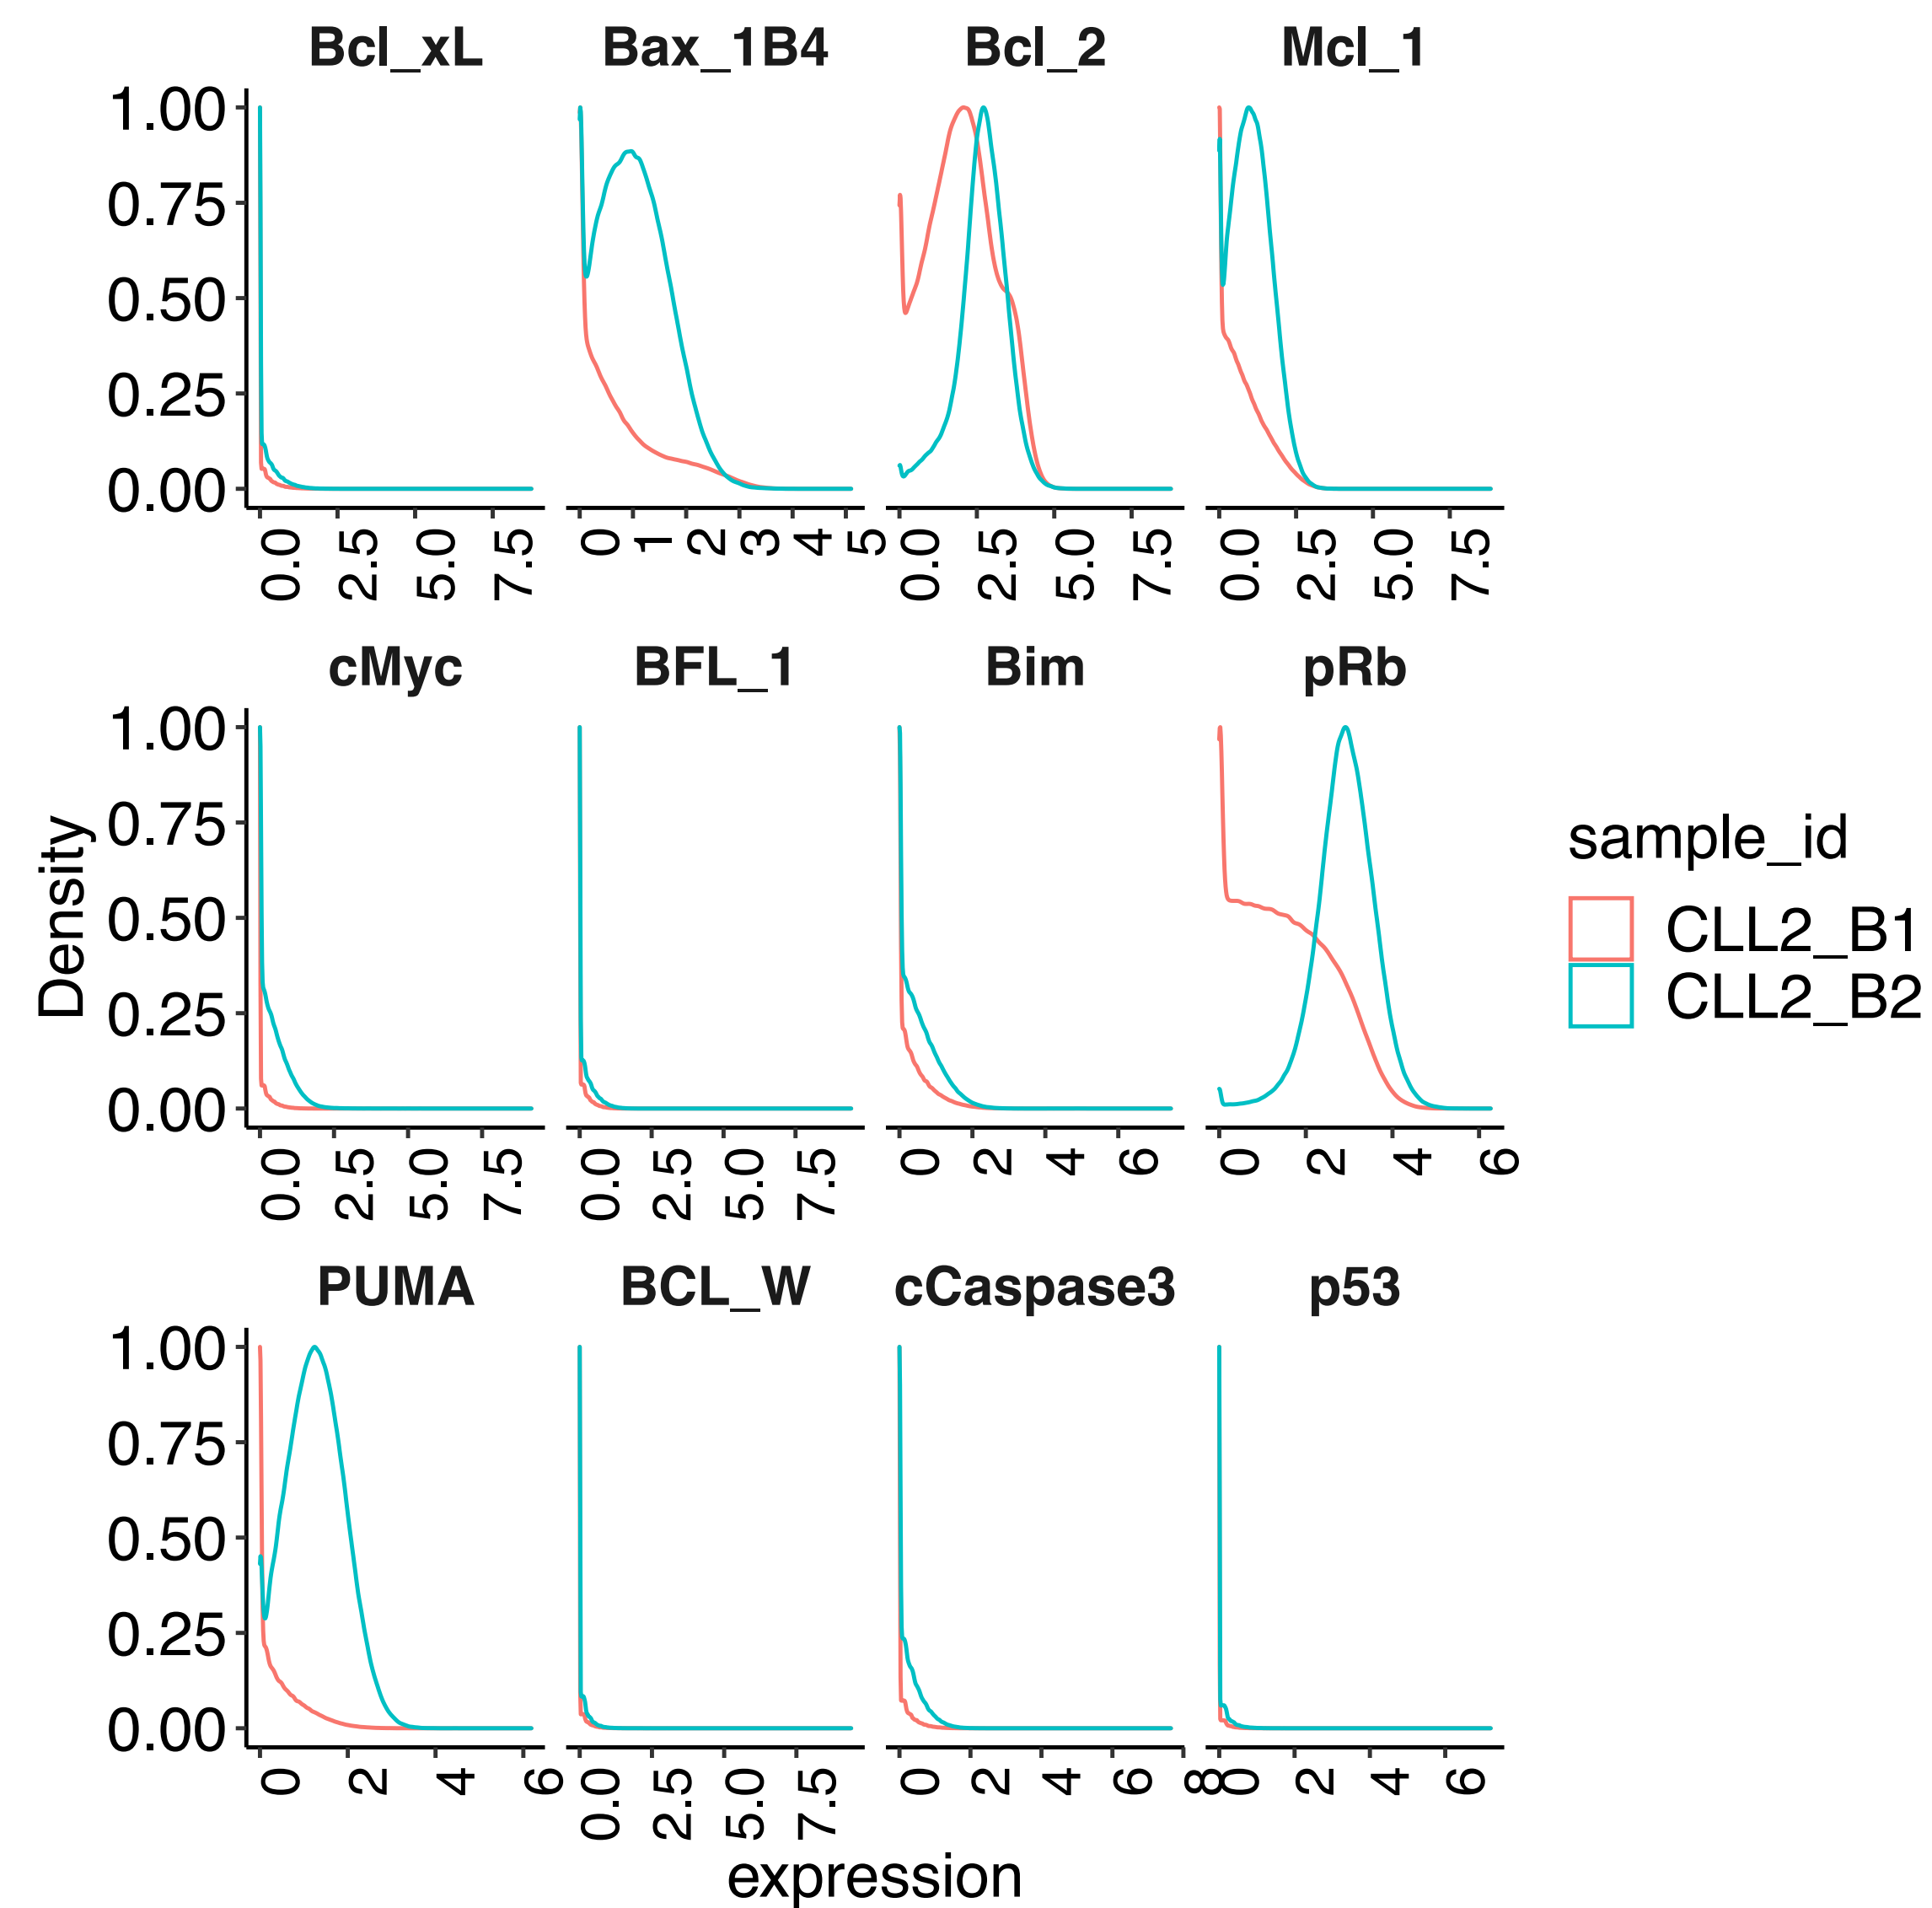

D

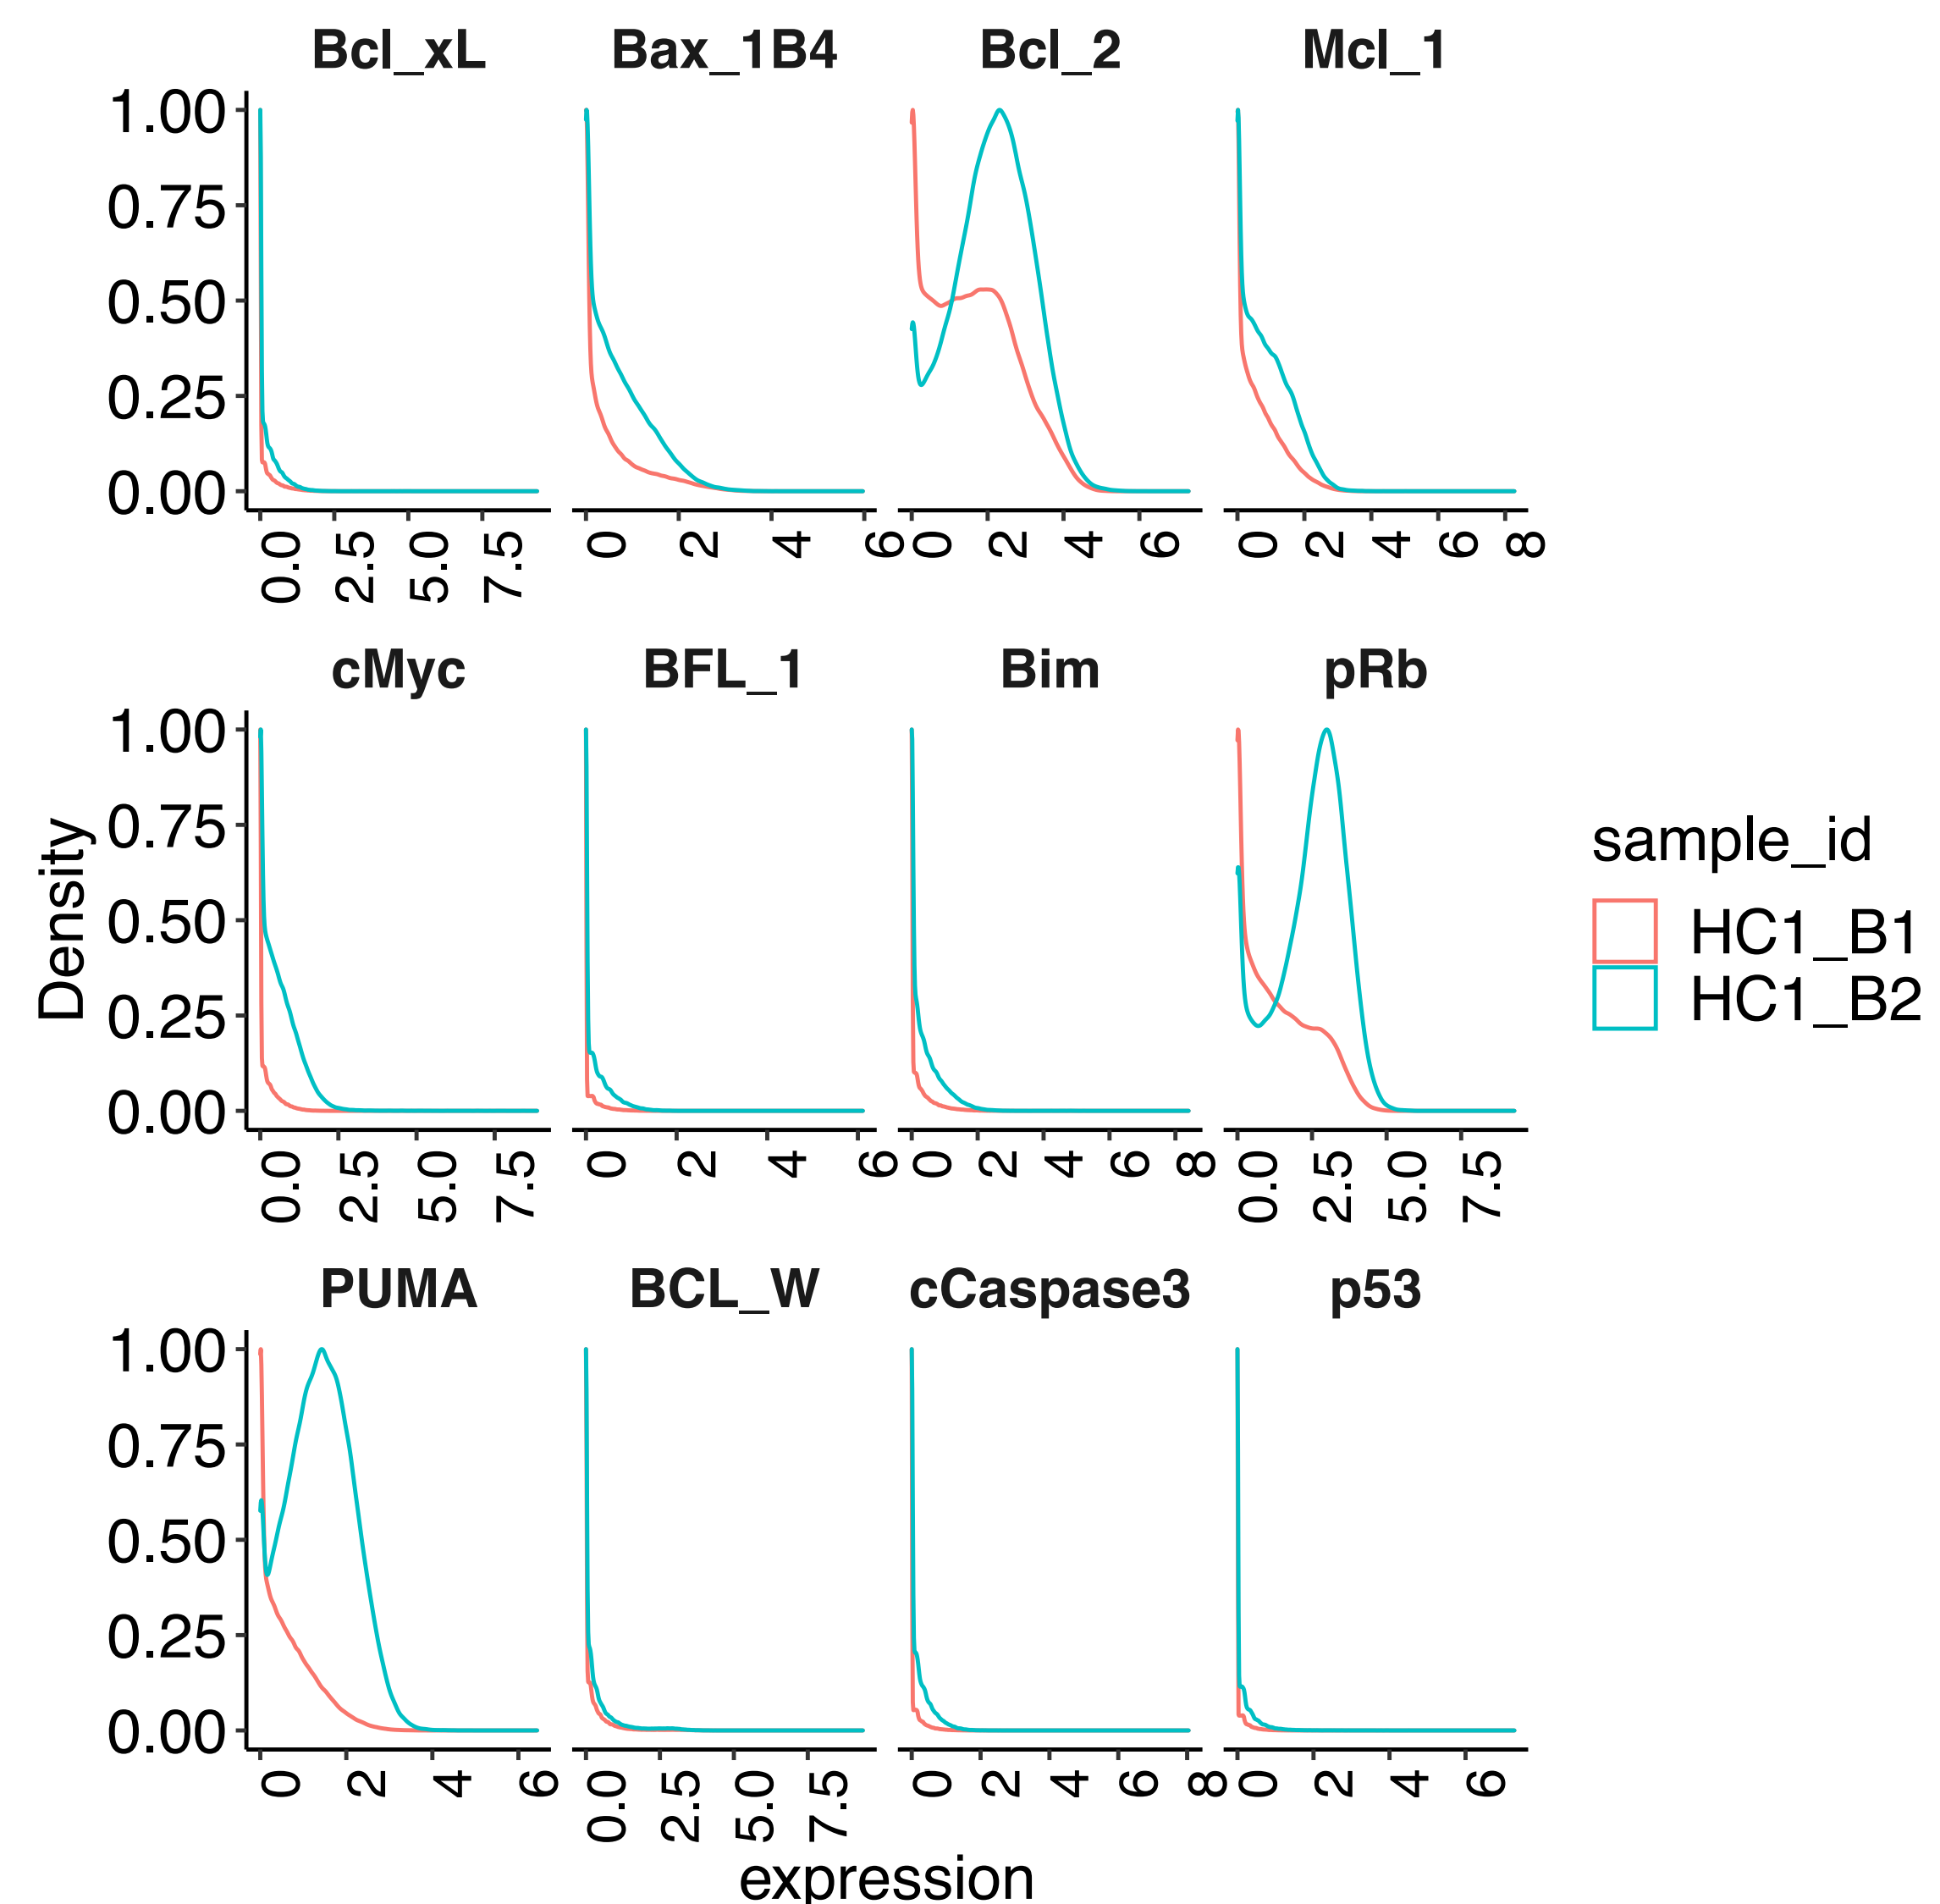

Supplement: supp [file elife_poa_e59630_Figure_2_figure_supplement_1.pdf › elife_poa_e59630_Figure_2_figure_supplement_1.pdf]

A

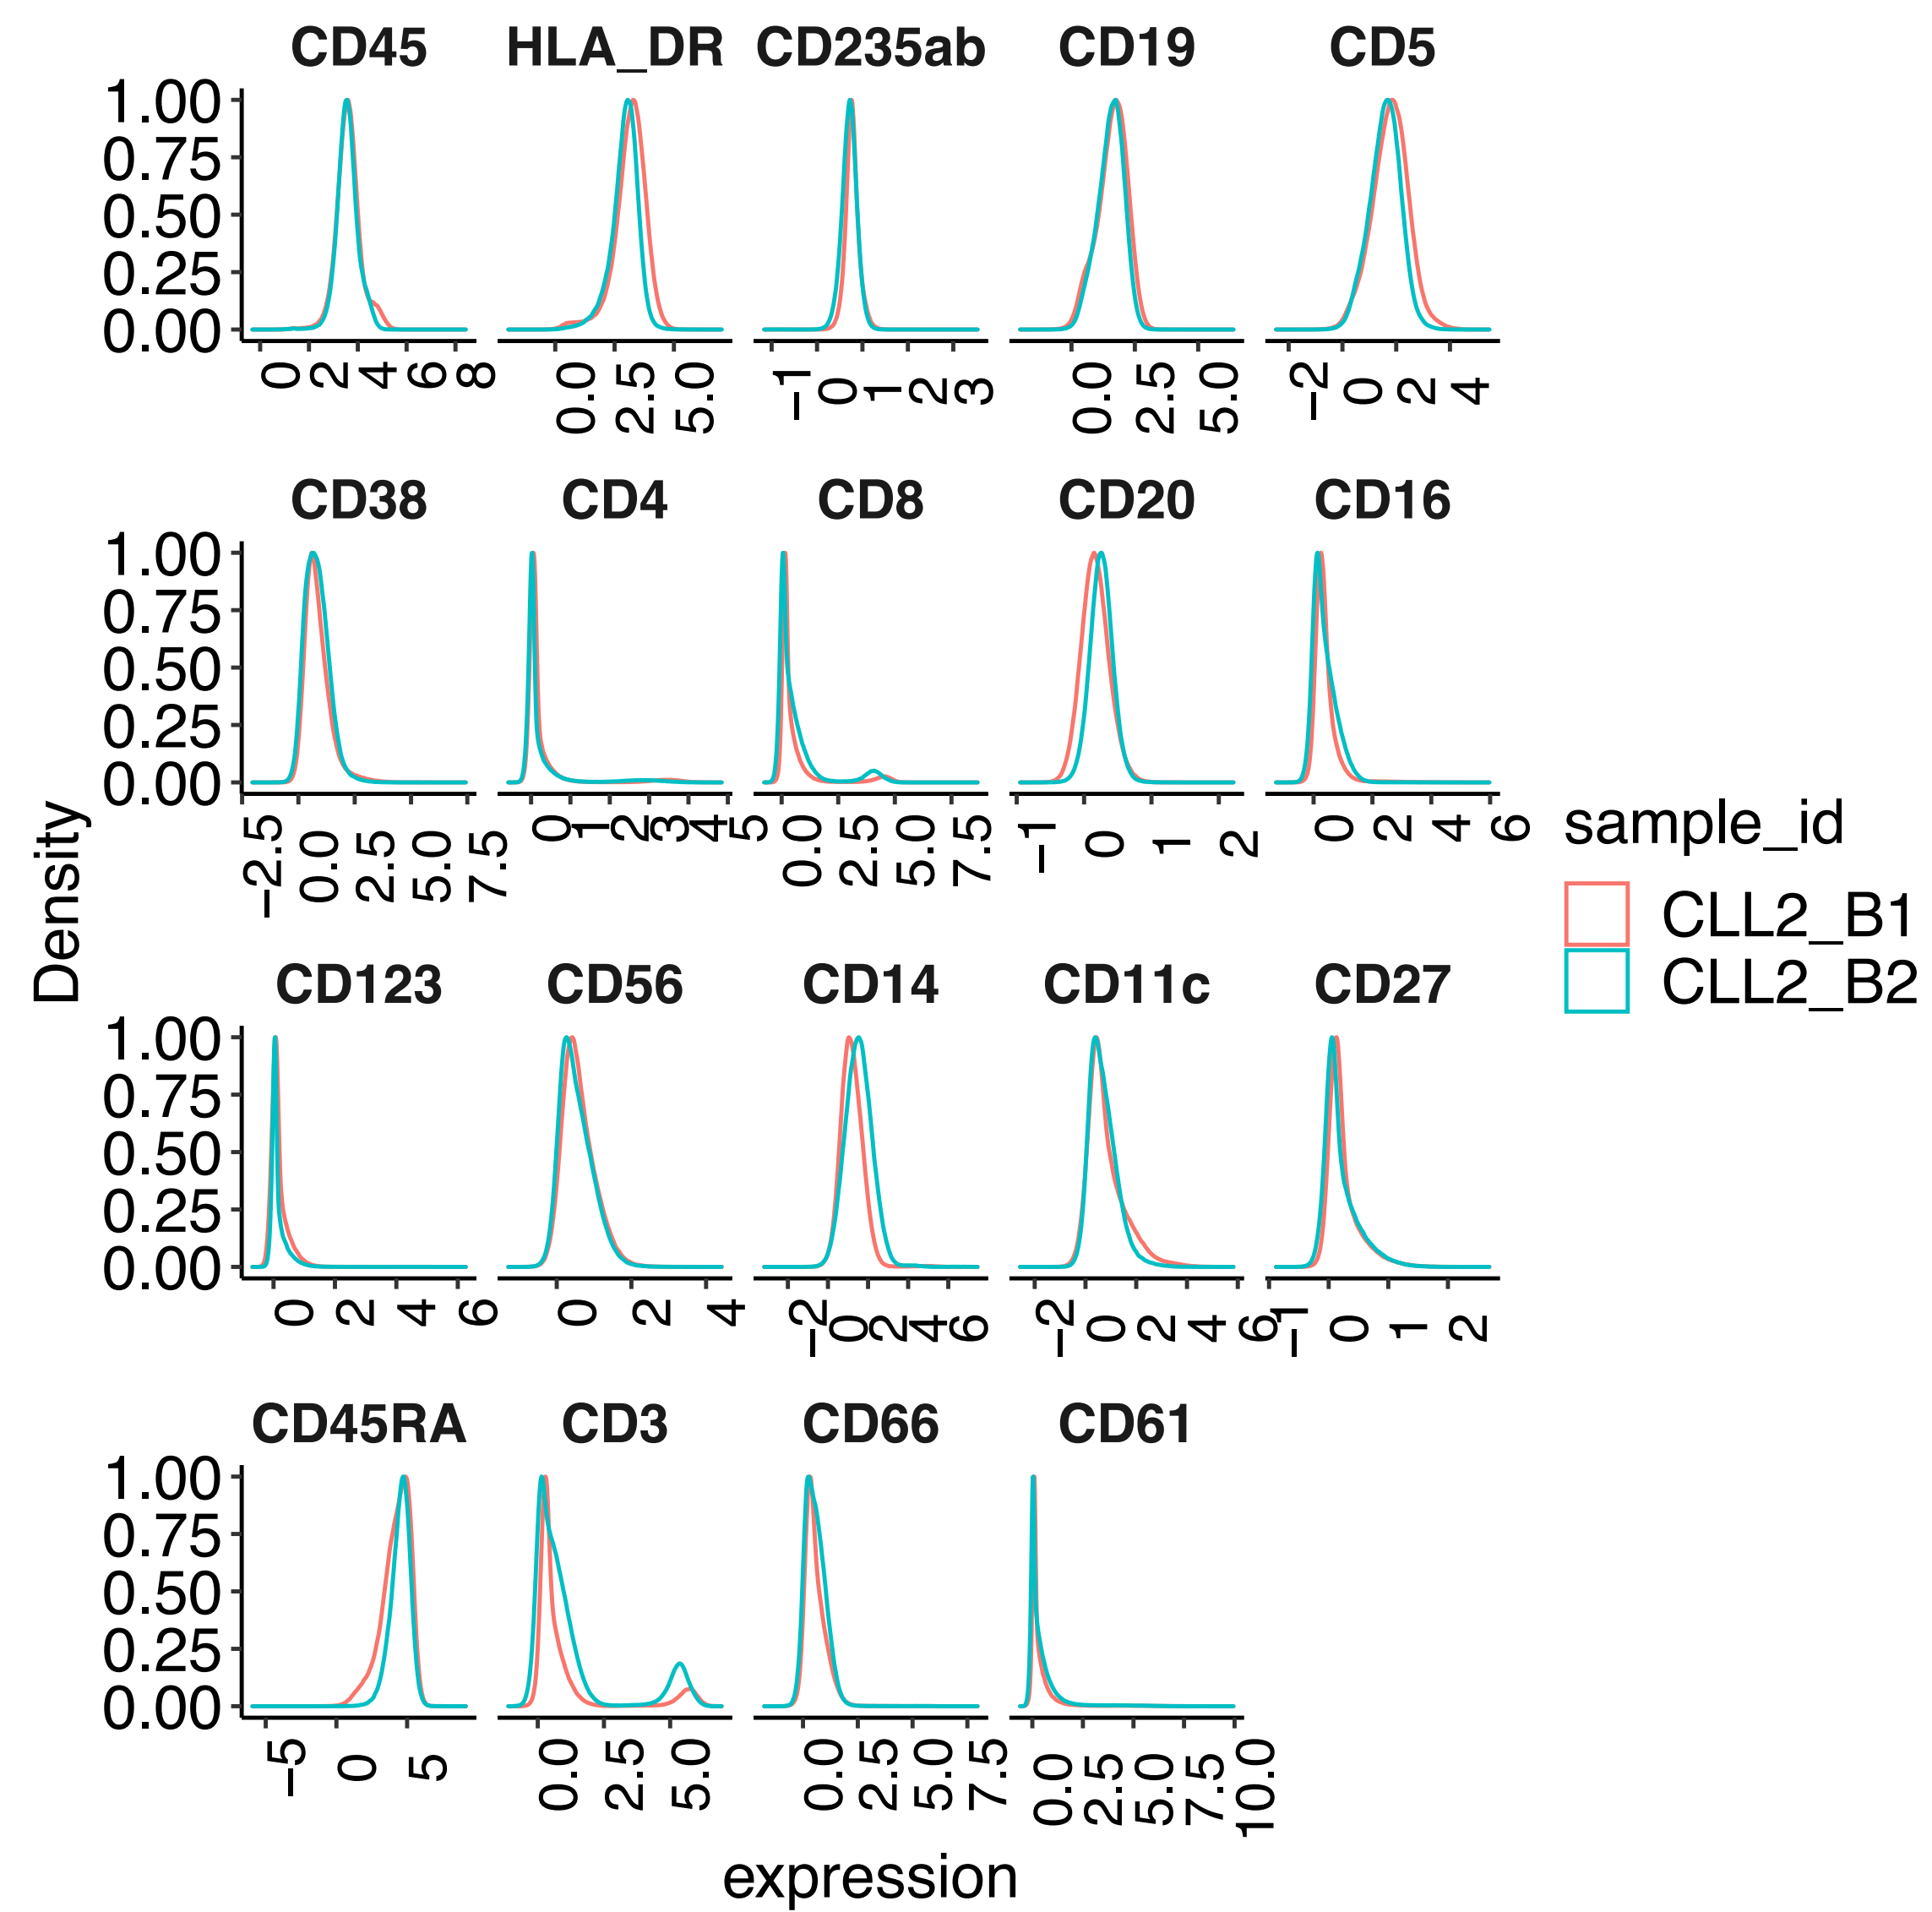

B

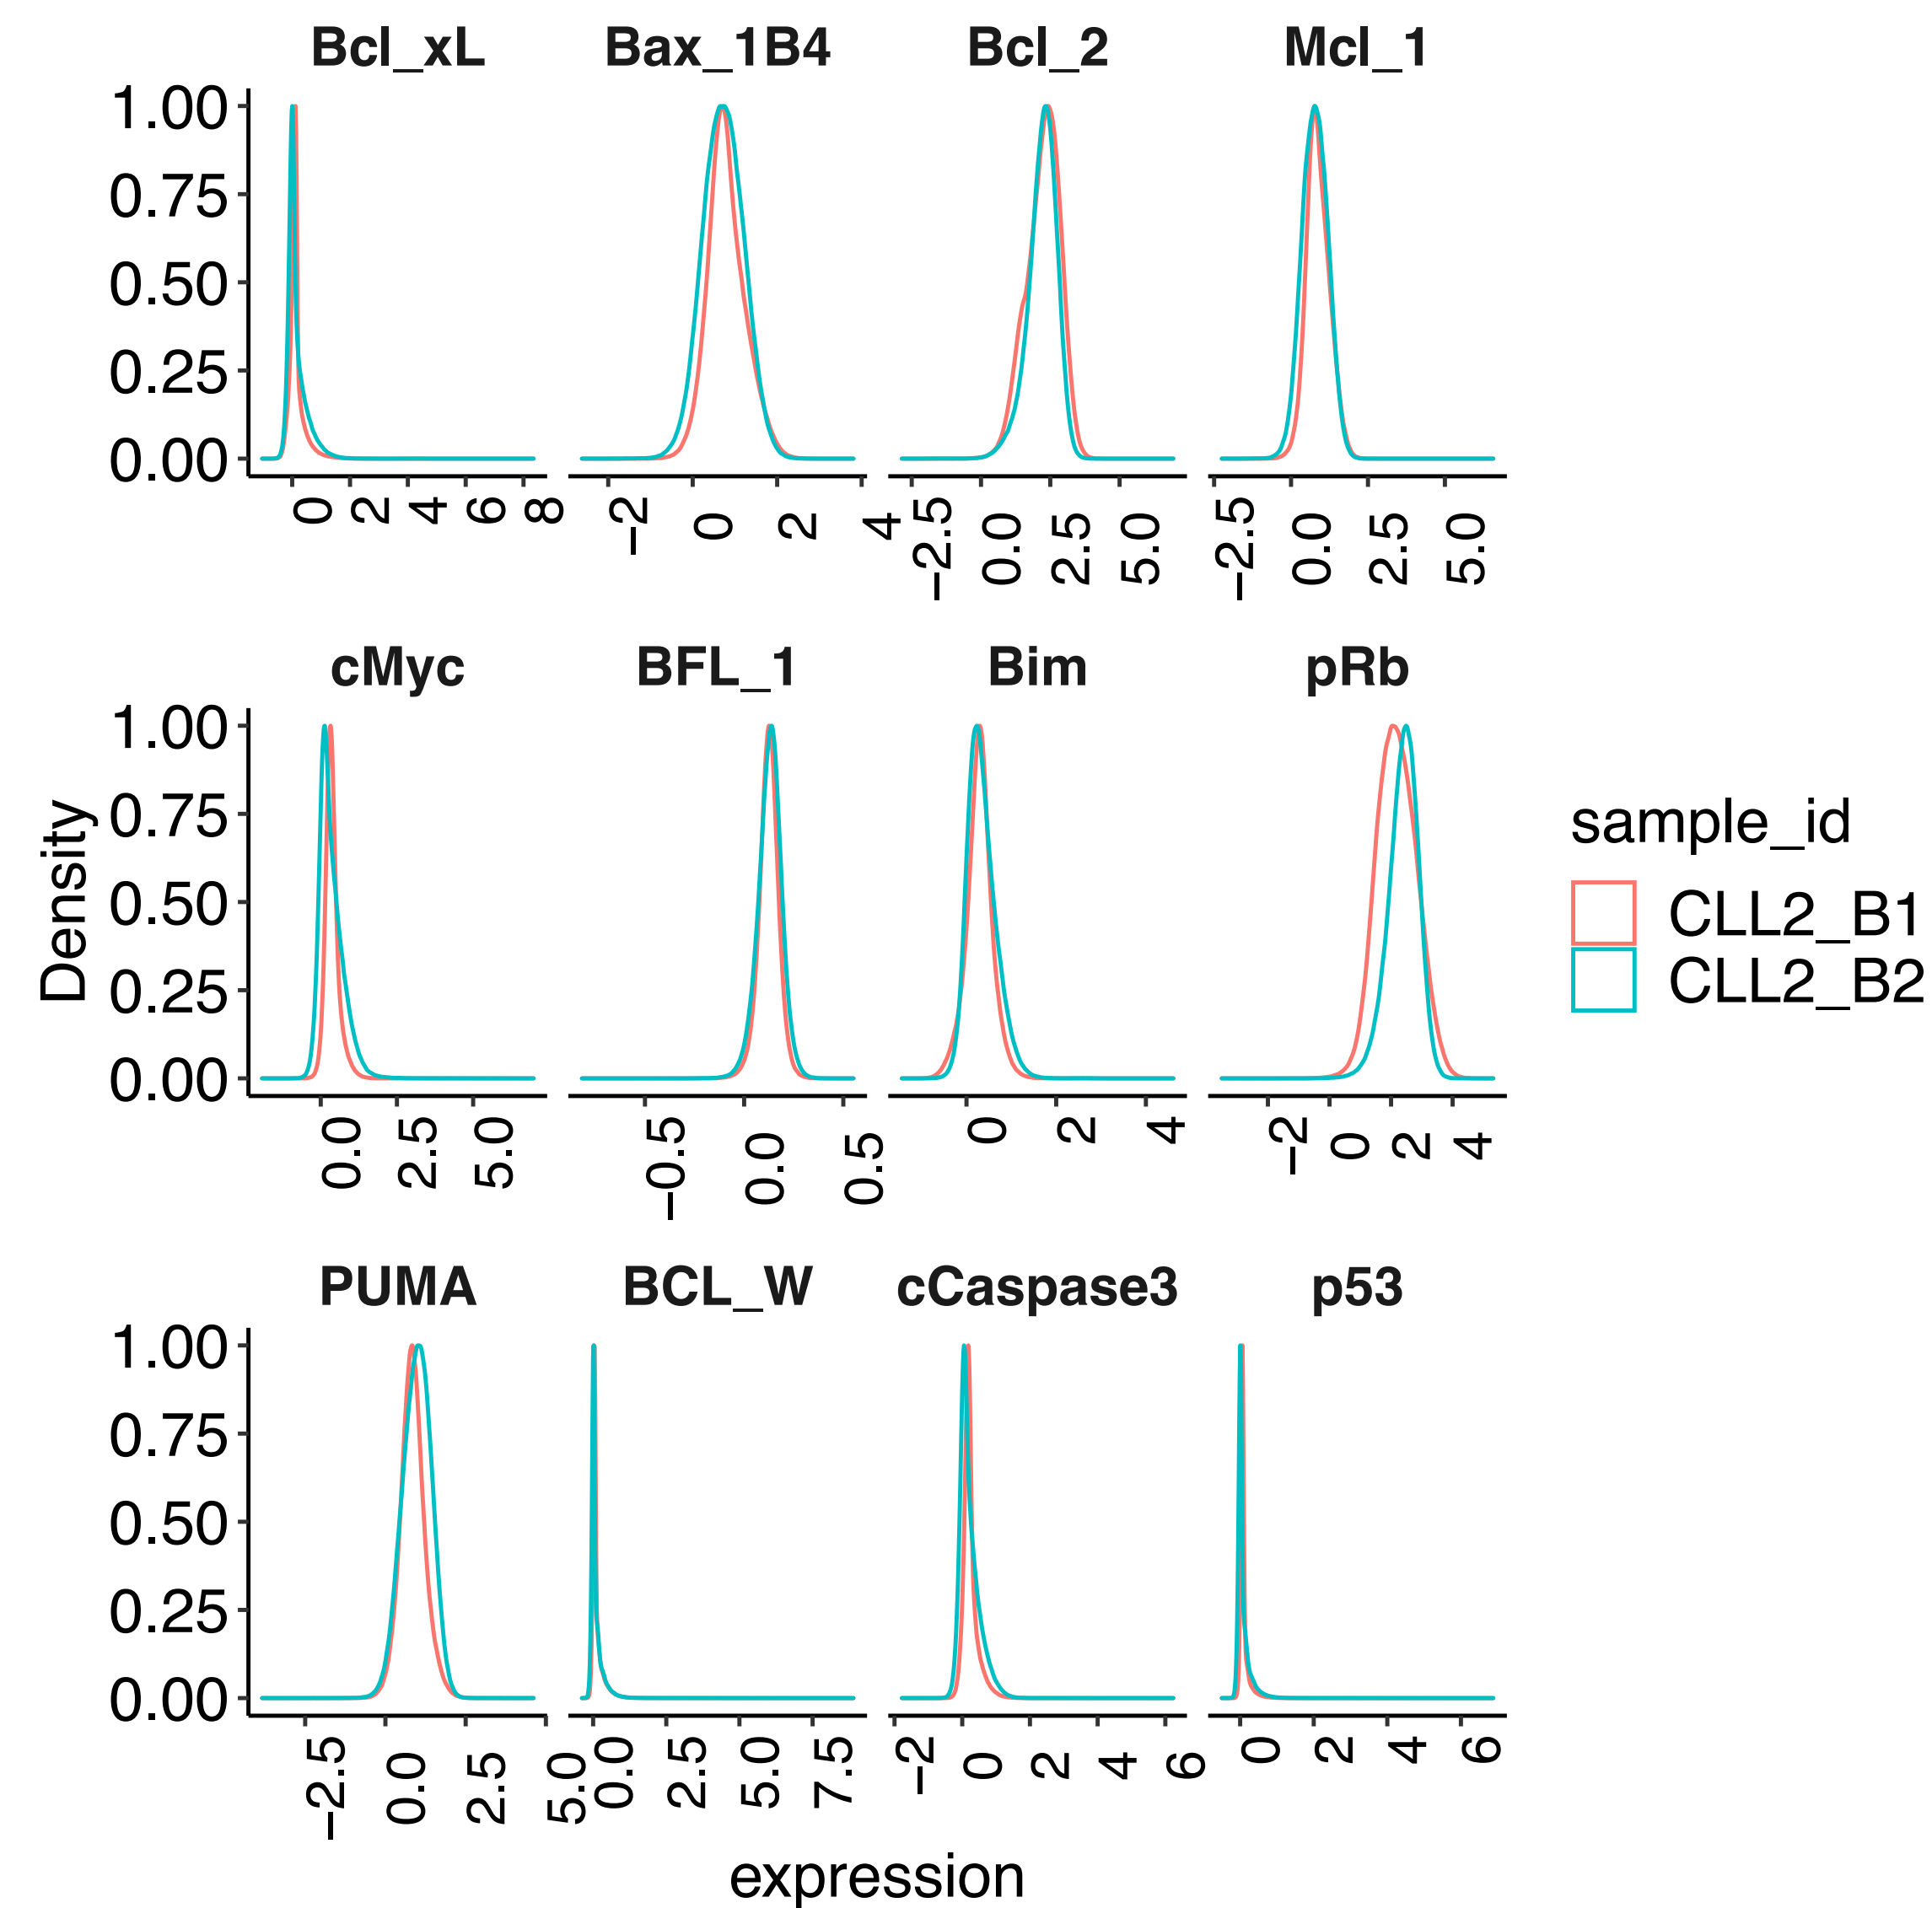

C

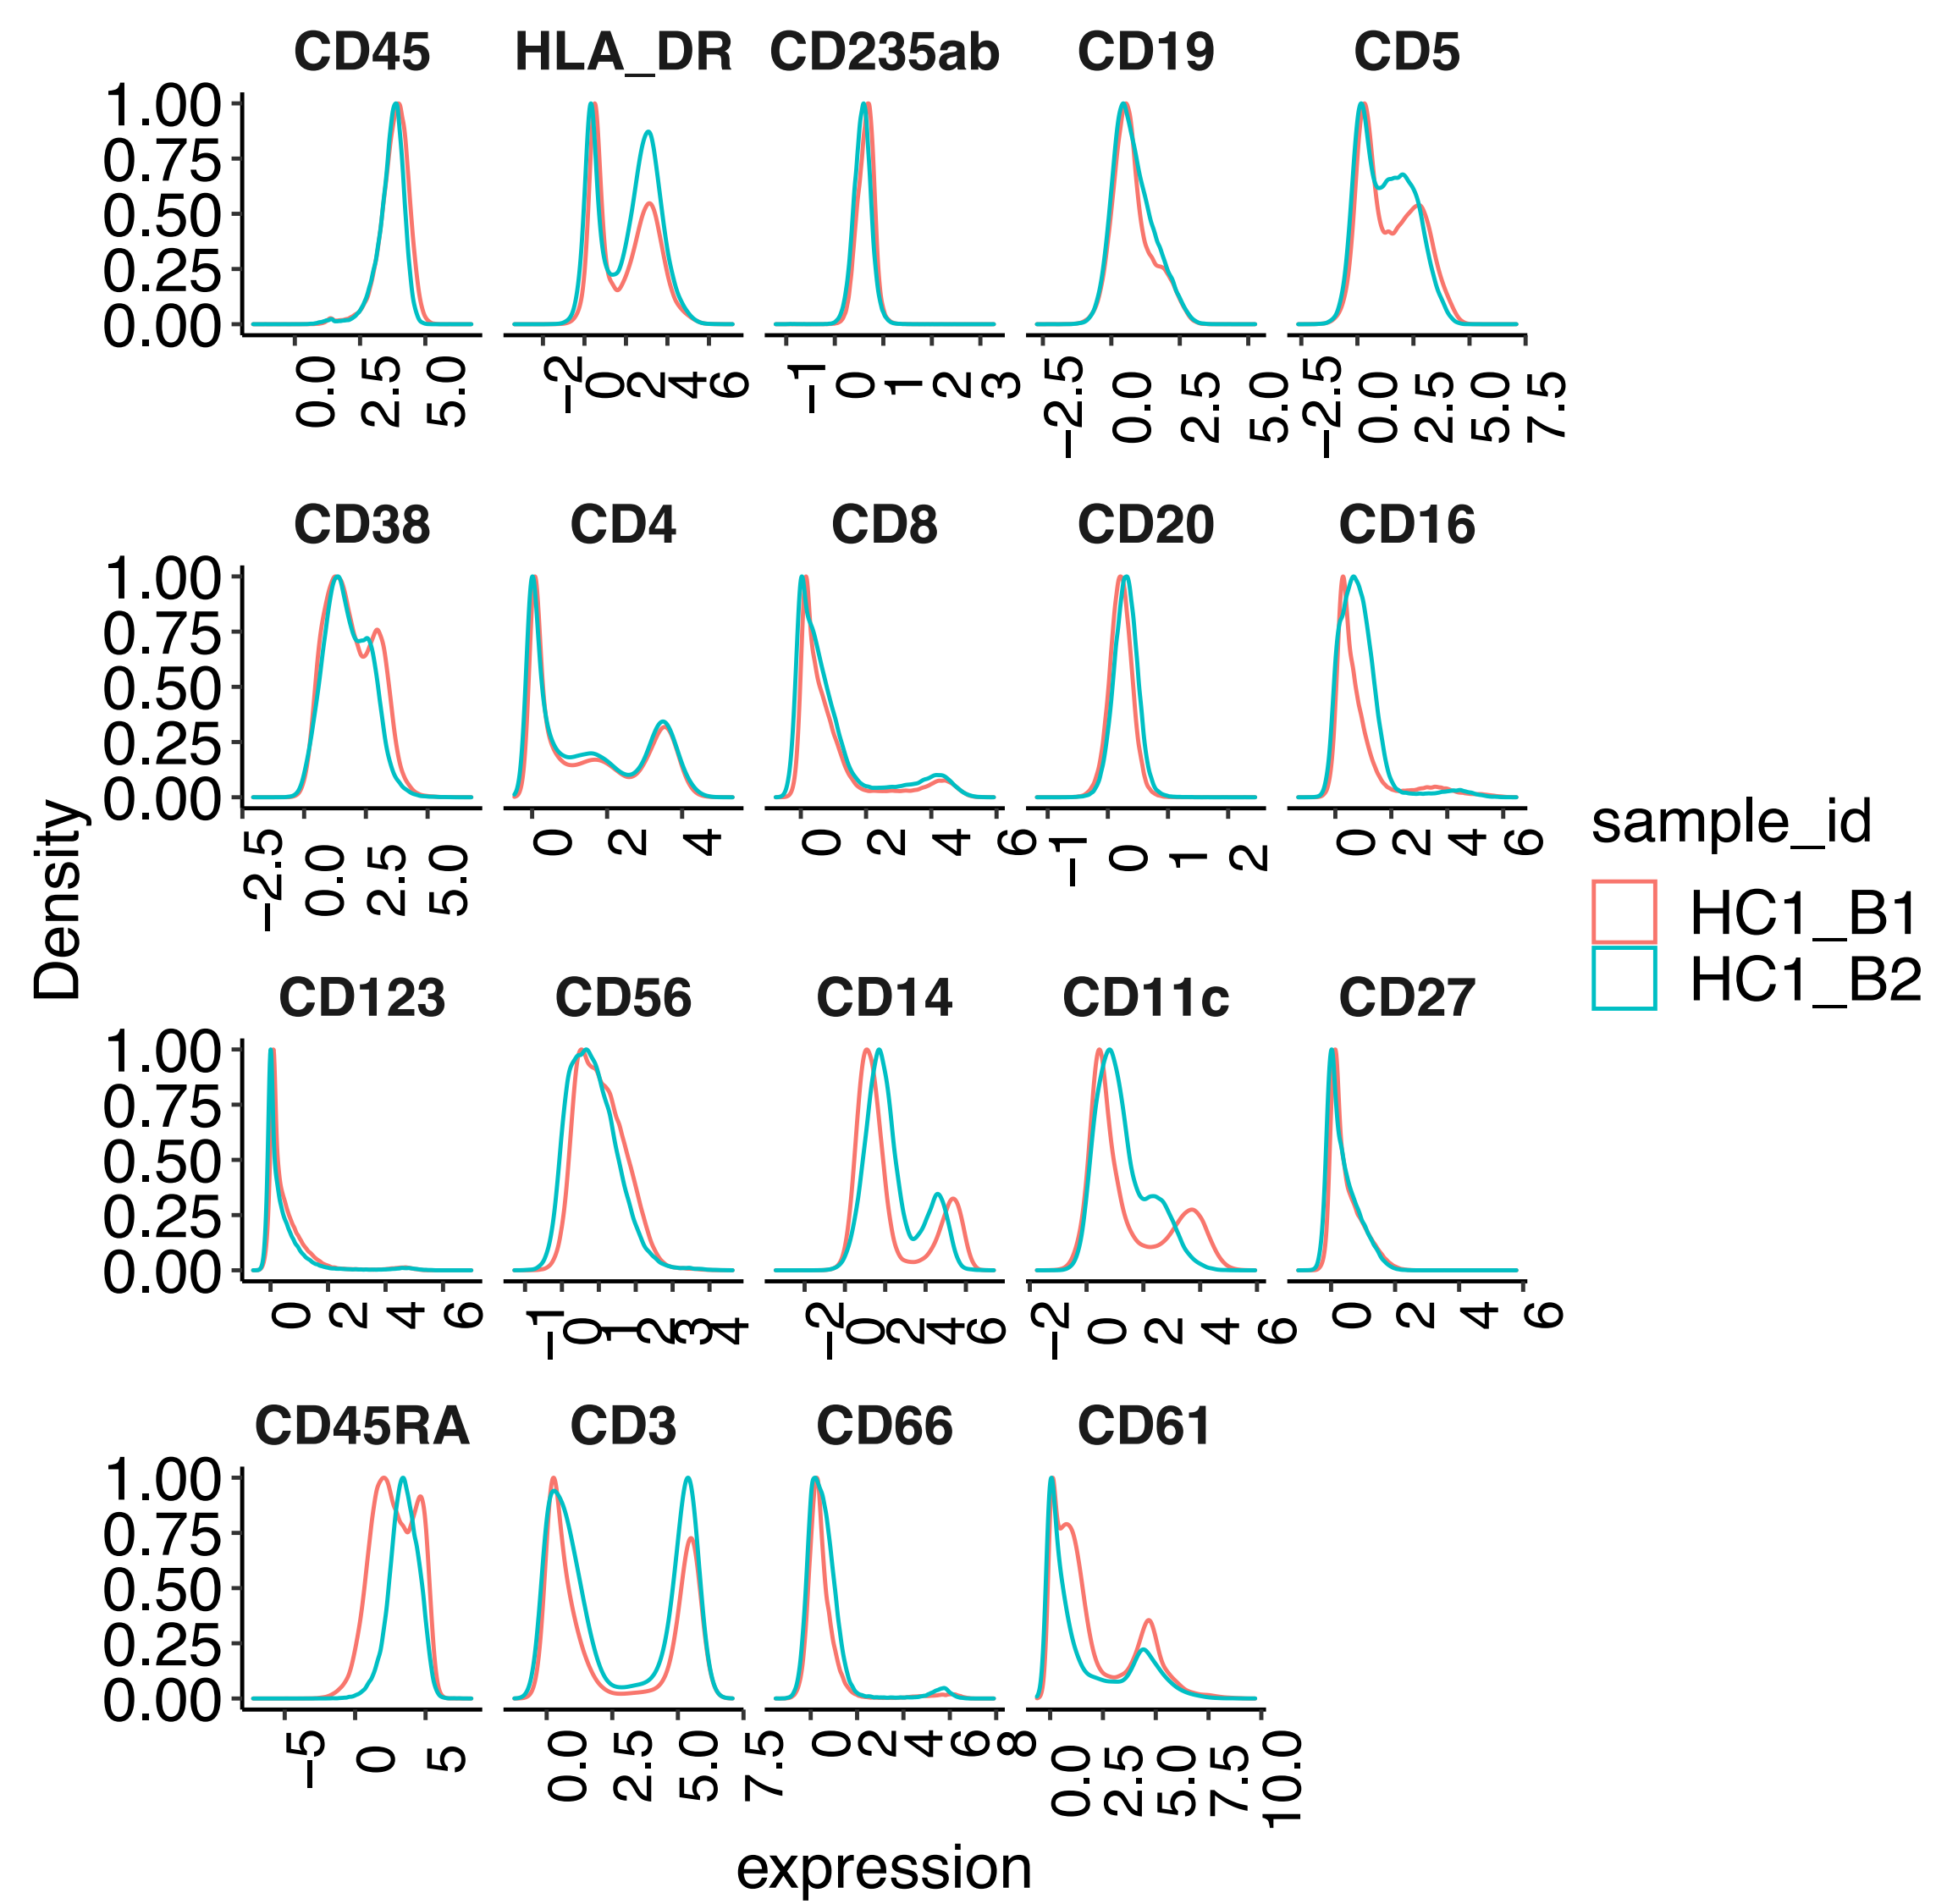

D

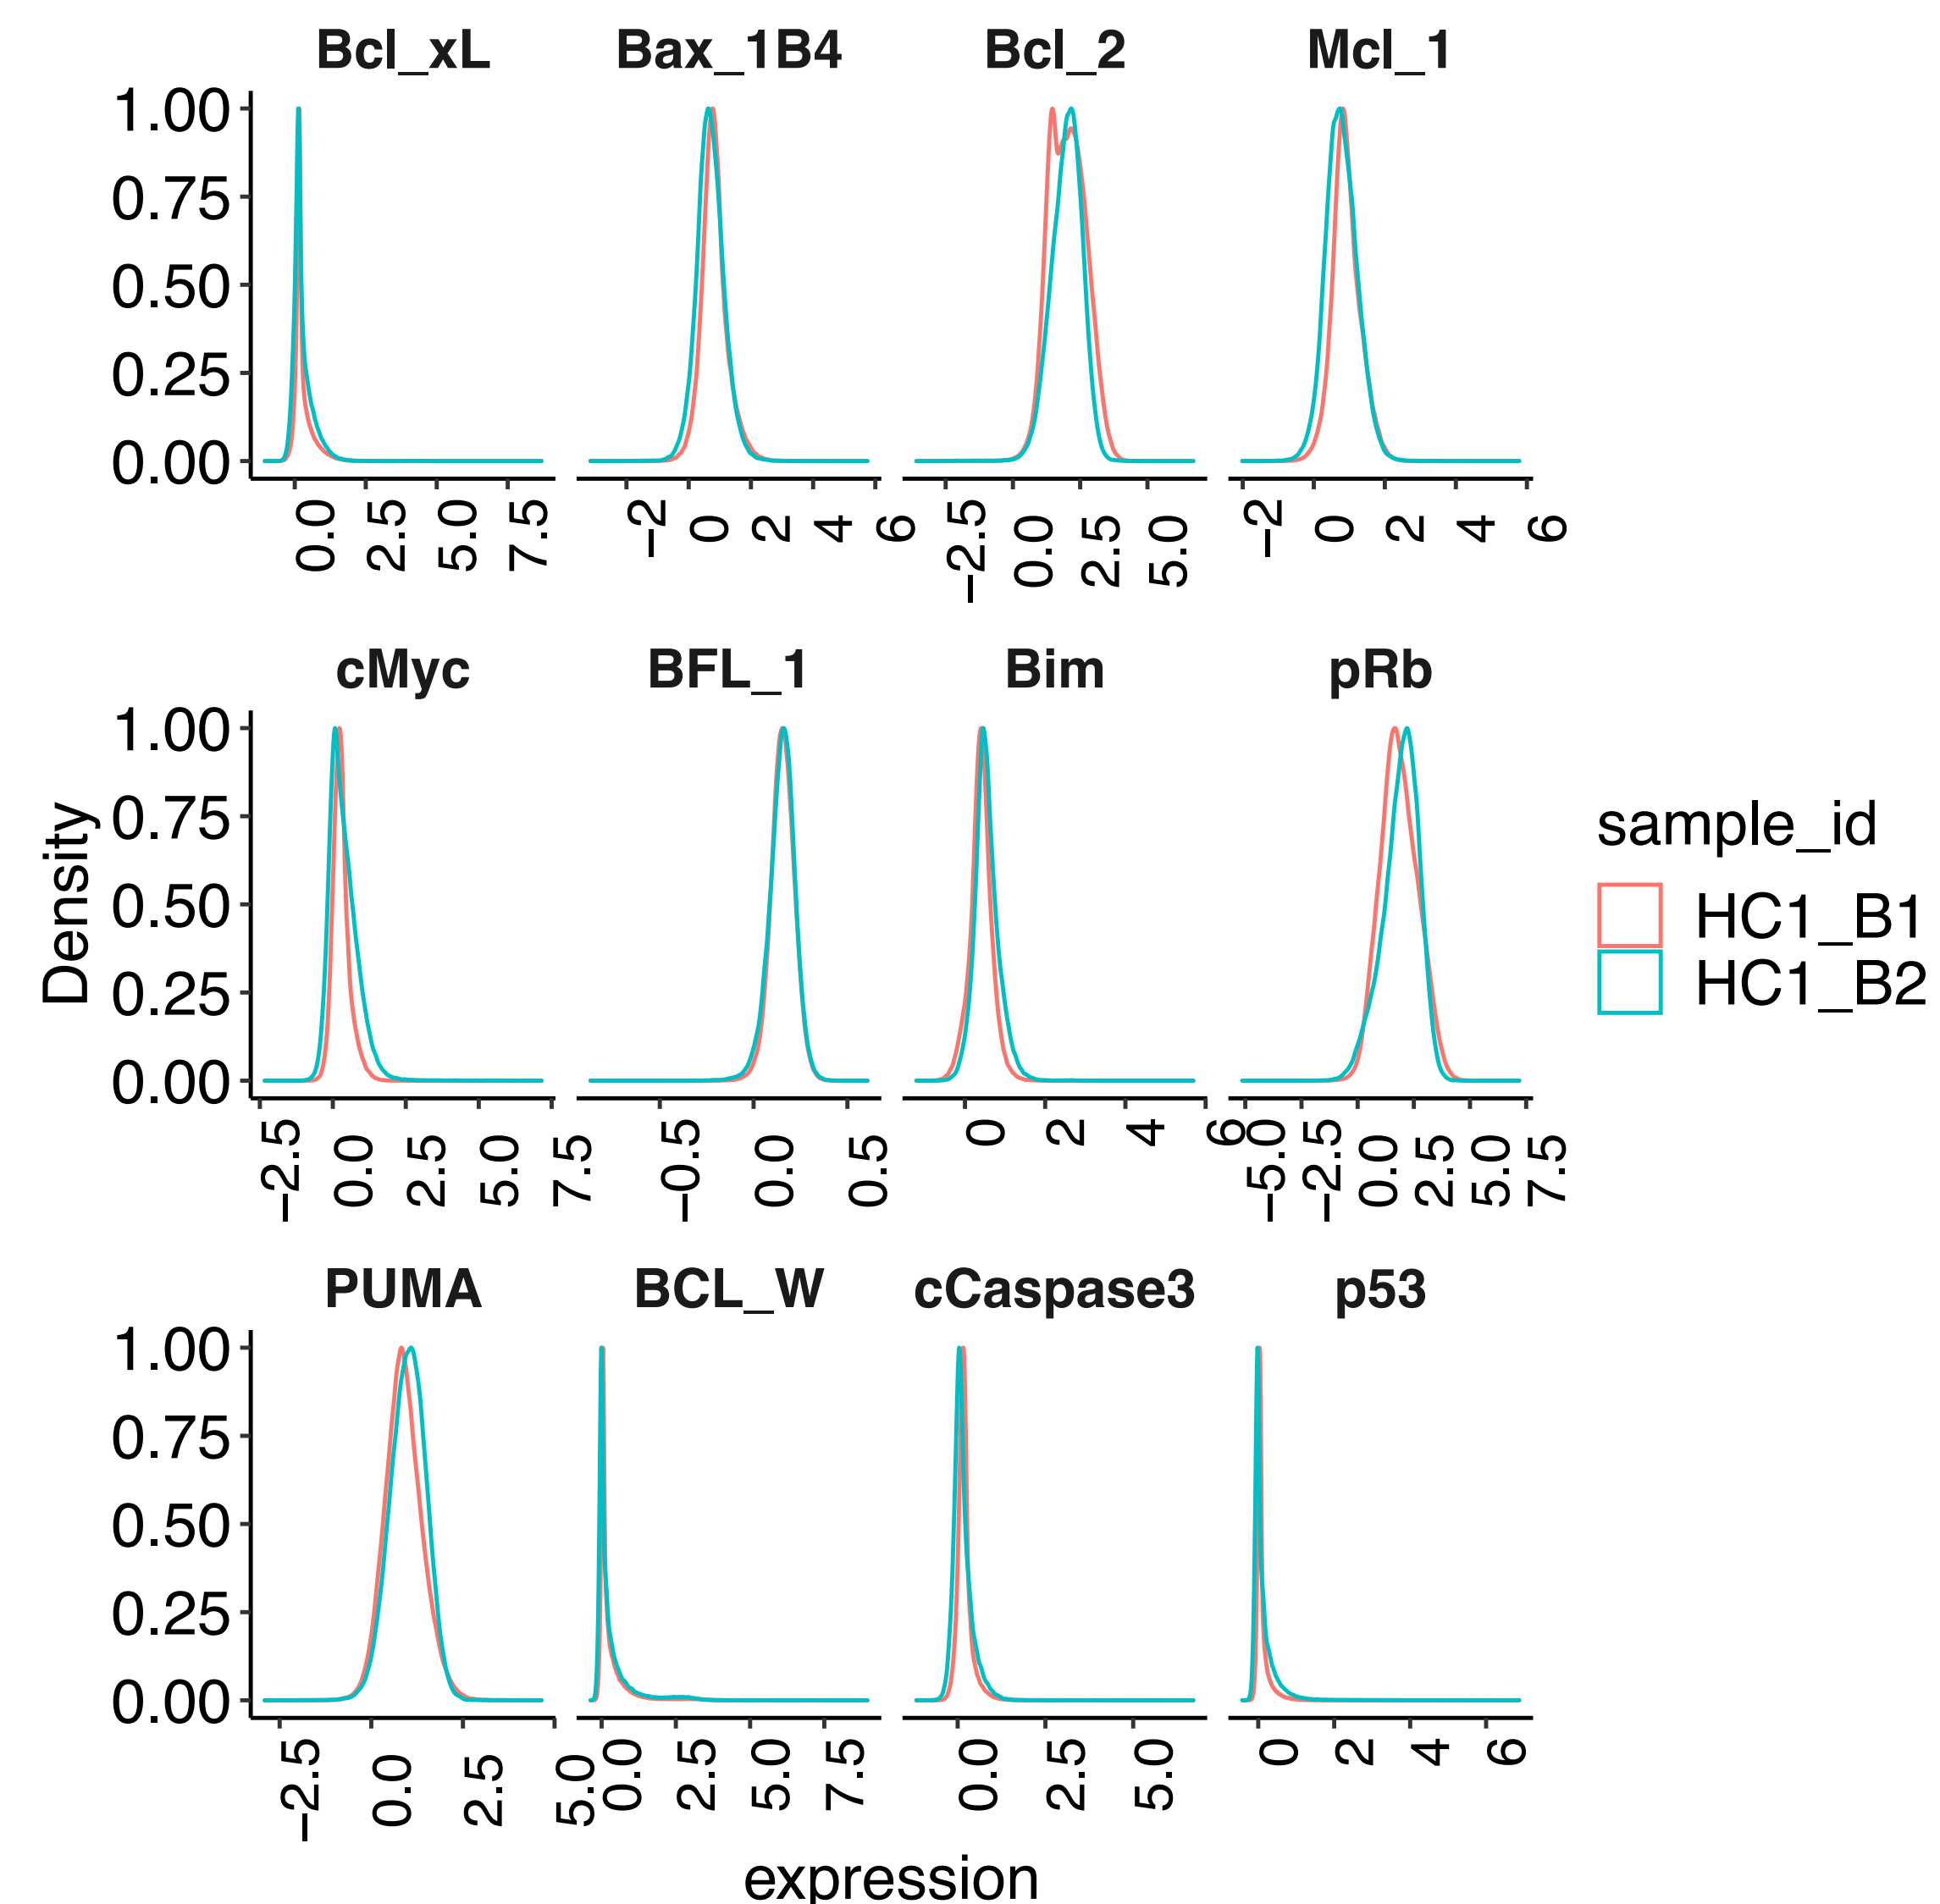

Supplement: supp [file elife_poa_e59630_Figure_2_figure_supplement_2.pdf › elife_poa_e59630_Figure_2_figure_supplement_2.pdf]

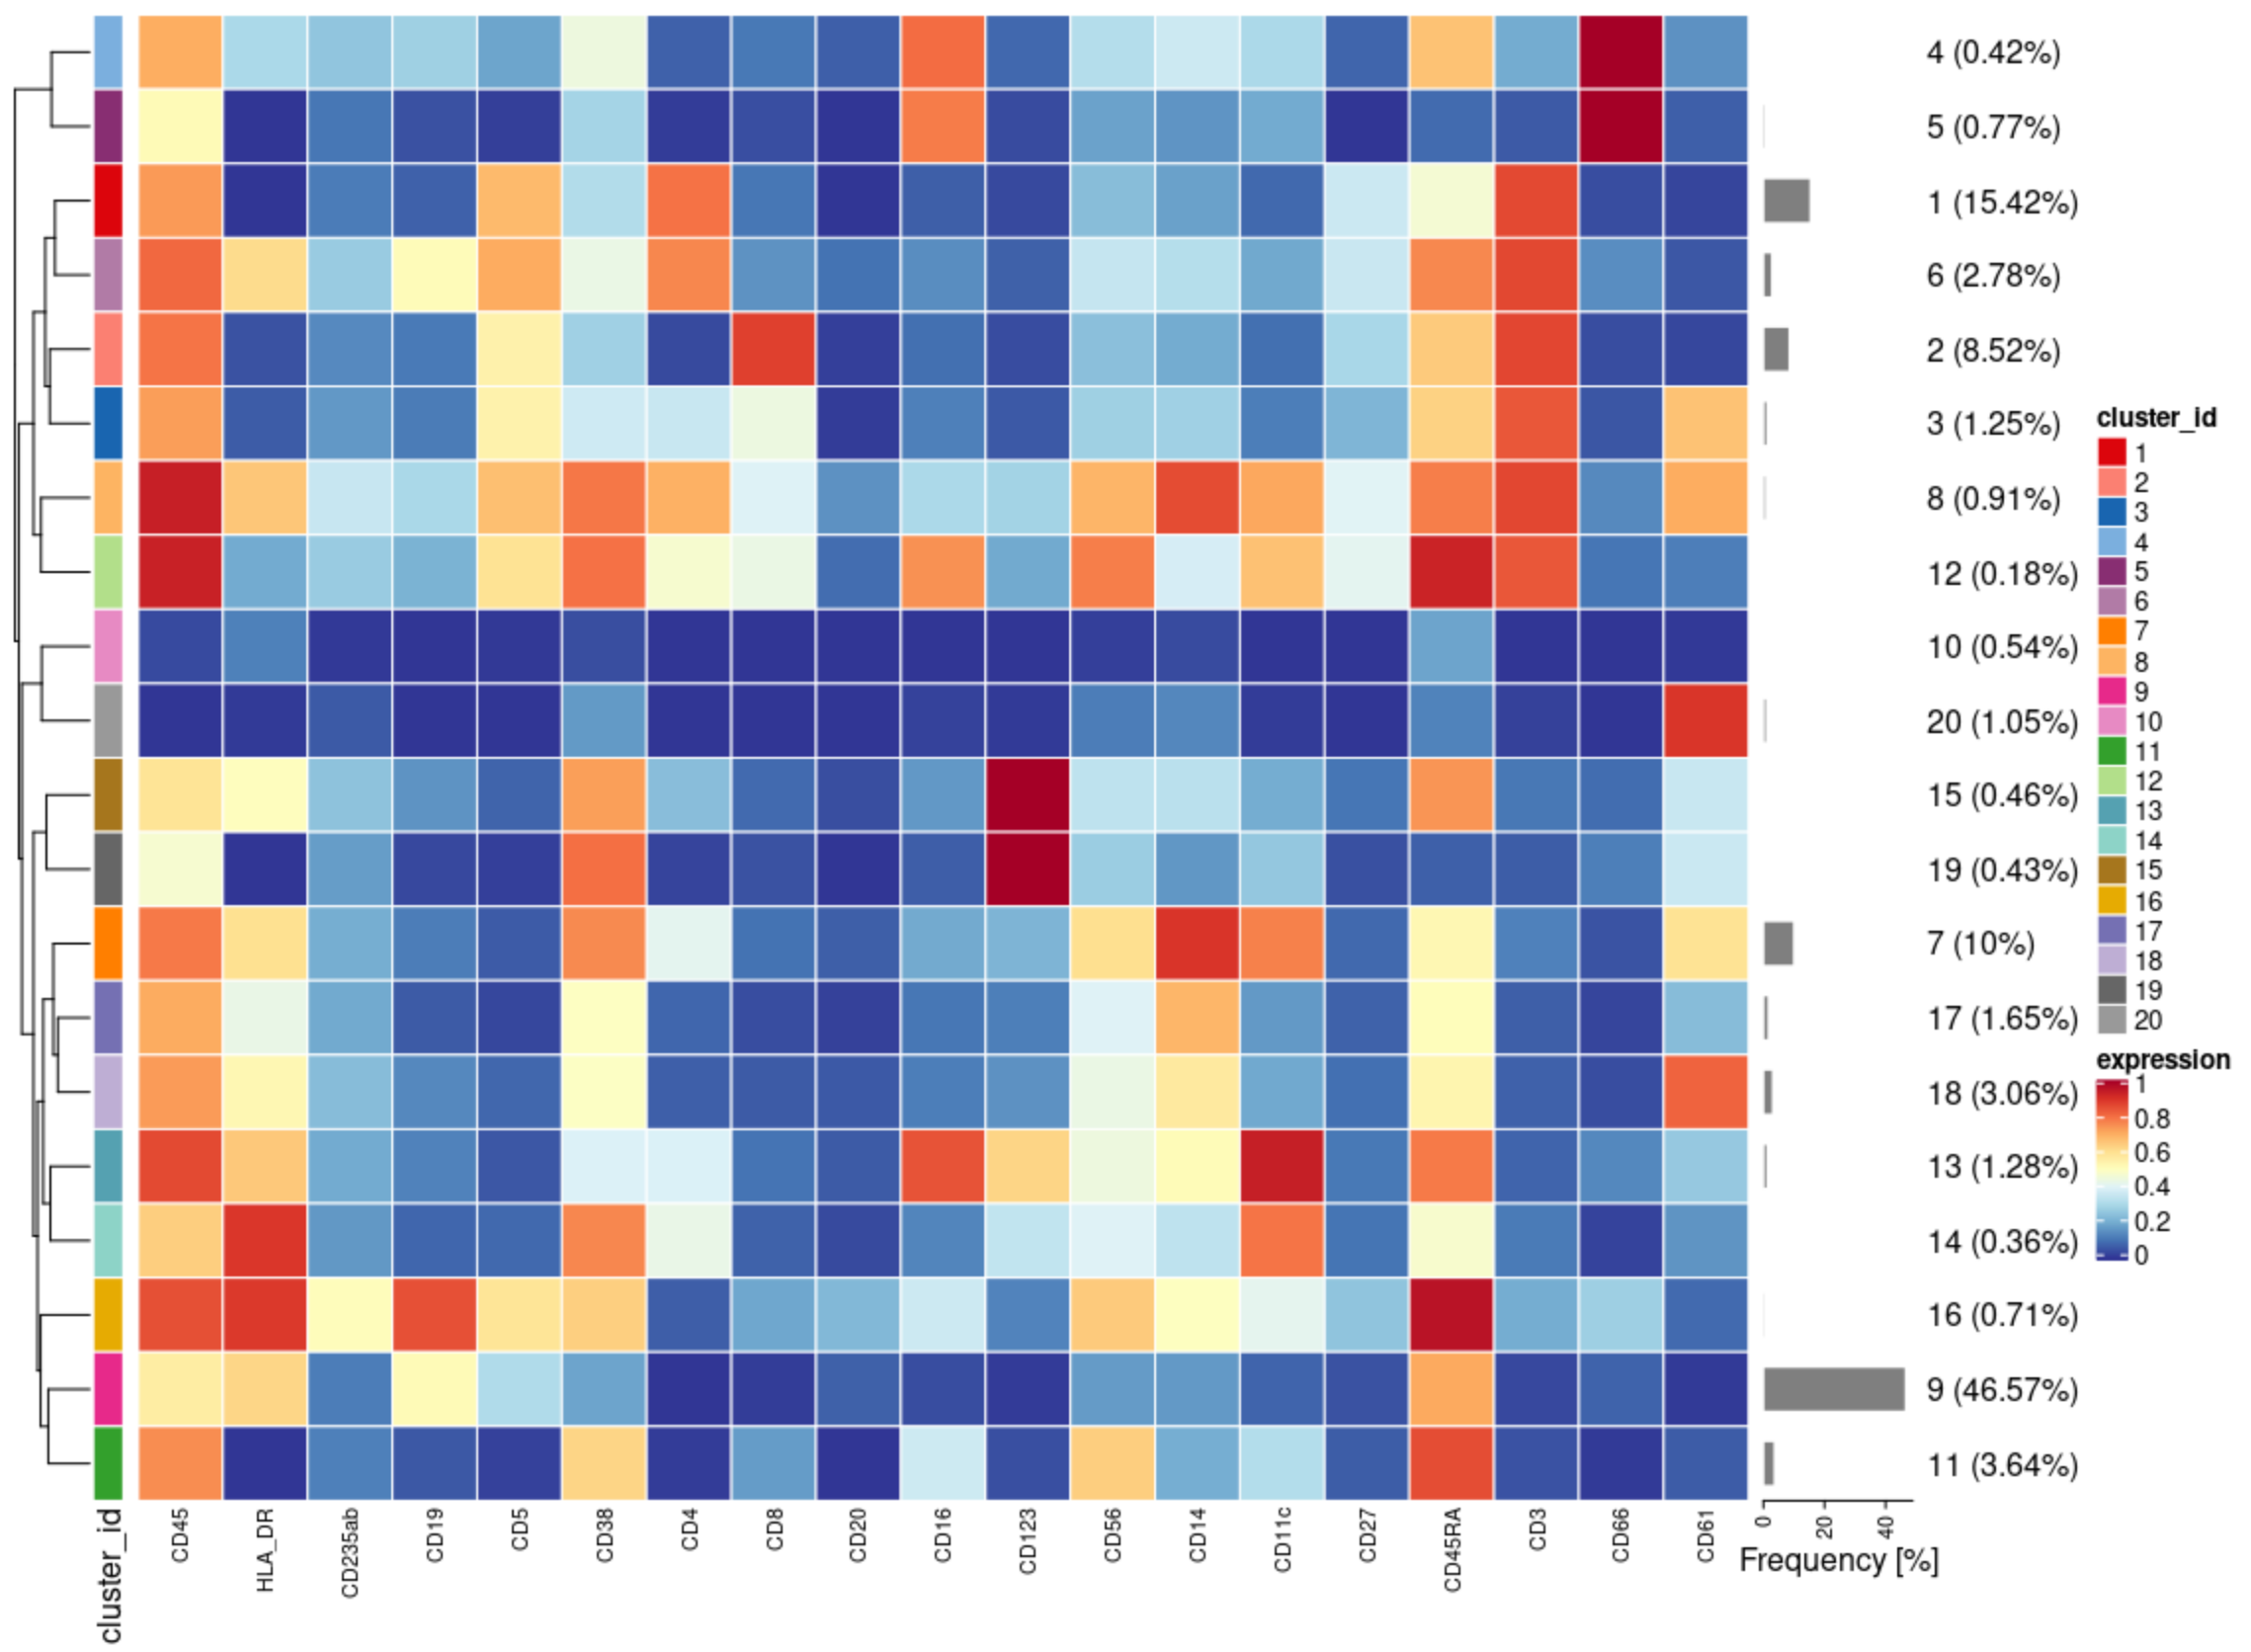

Supplement: supp [file elife_poa_e59630_Figure_3_figure_supplement_1.pdf › elife_poa_e59630_Figure_3_figure_supplement_1.pdf]

A

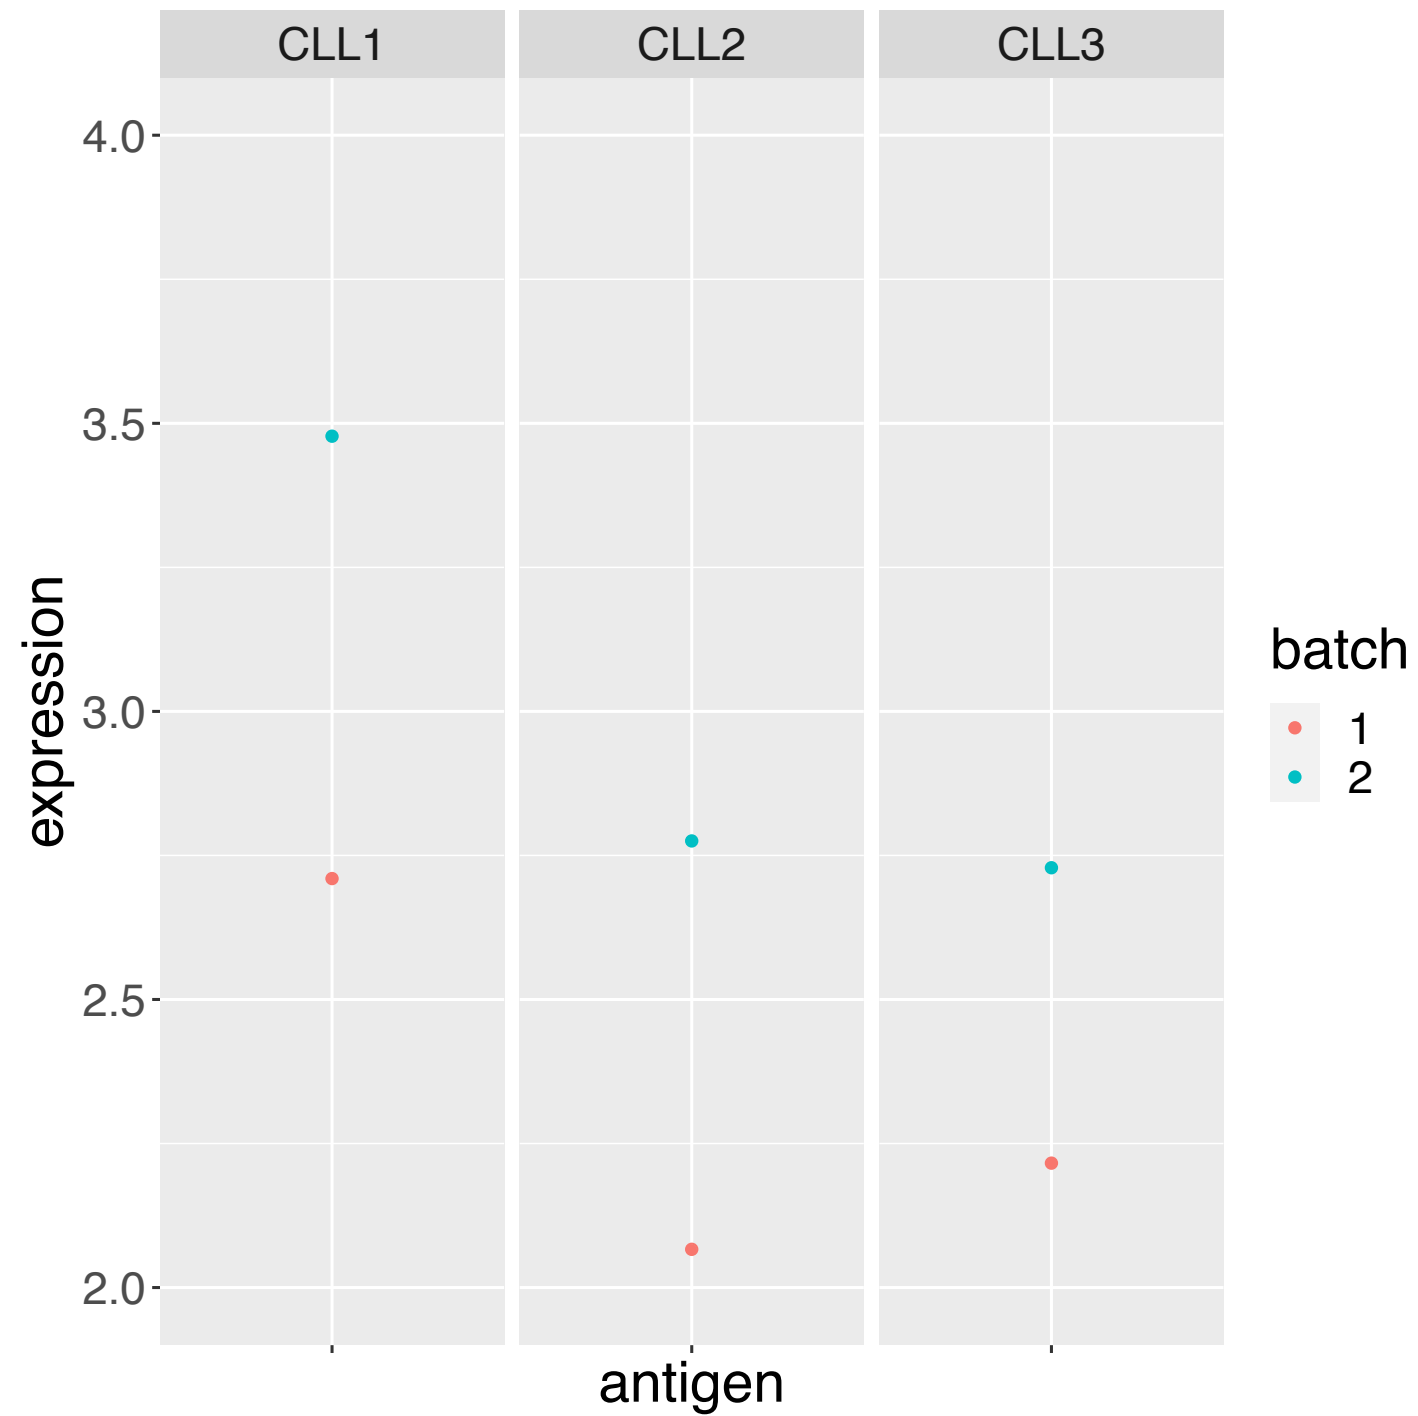

B

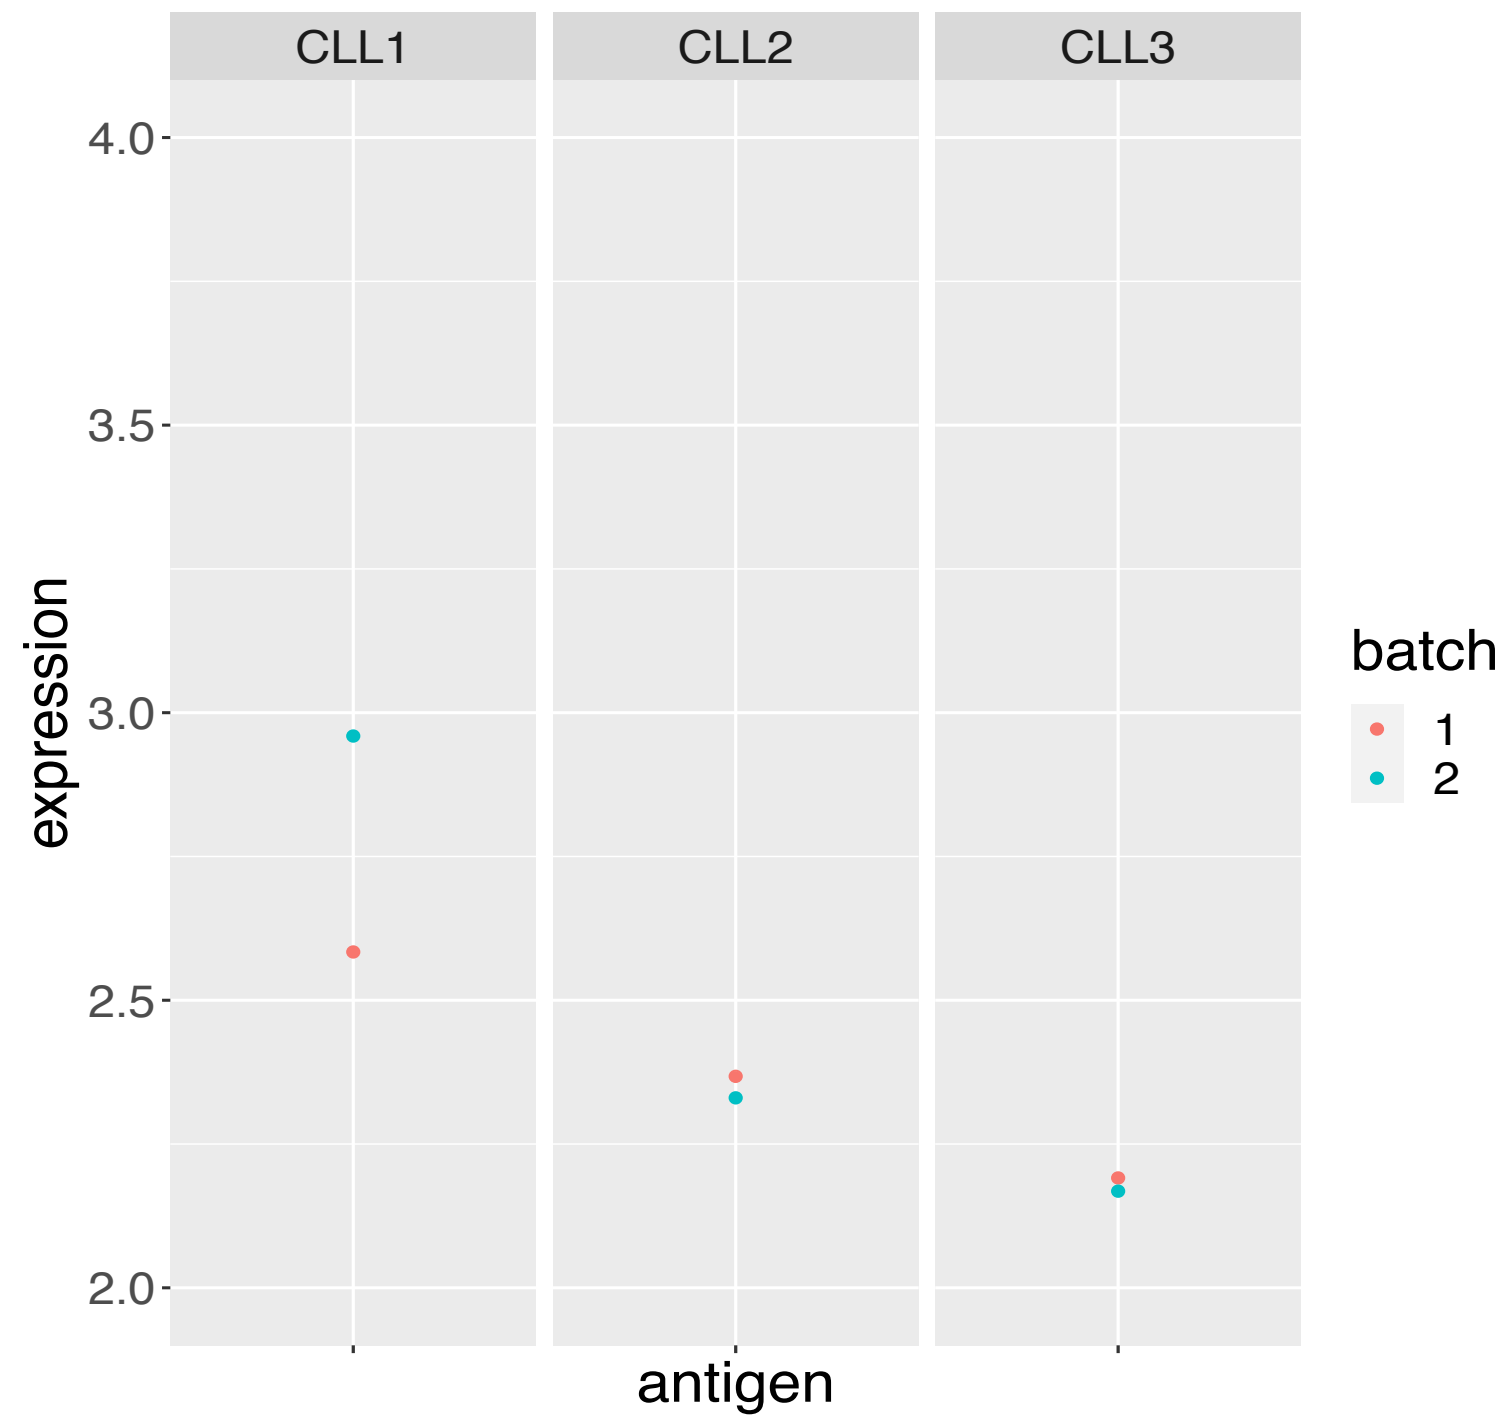

Supplement: supp [file elife_poa_e59630_Figure_3_figure_supplement_2.pdf › elife_poa_e59630_Figure_3_figure_supplement_2.pdf]

A

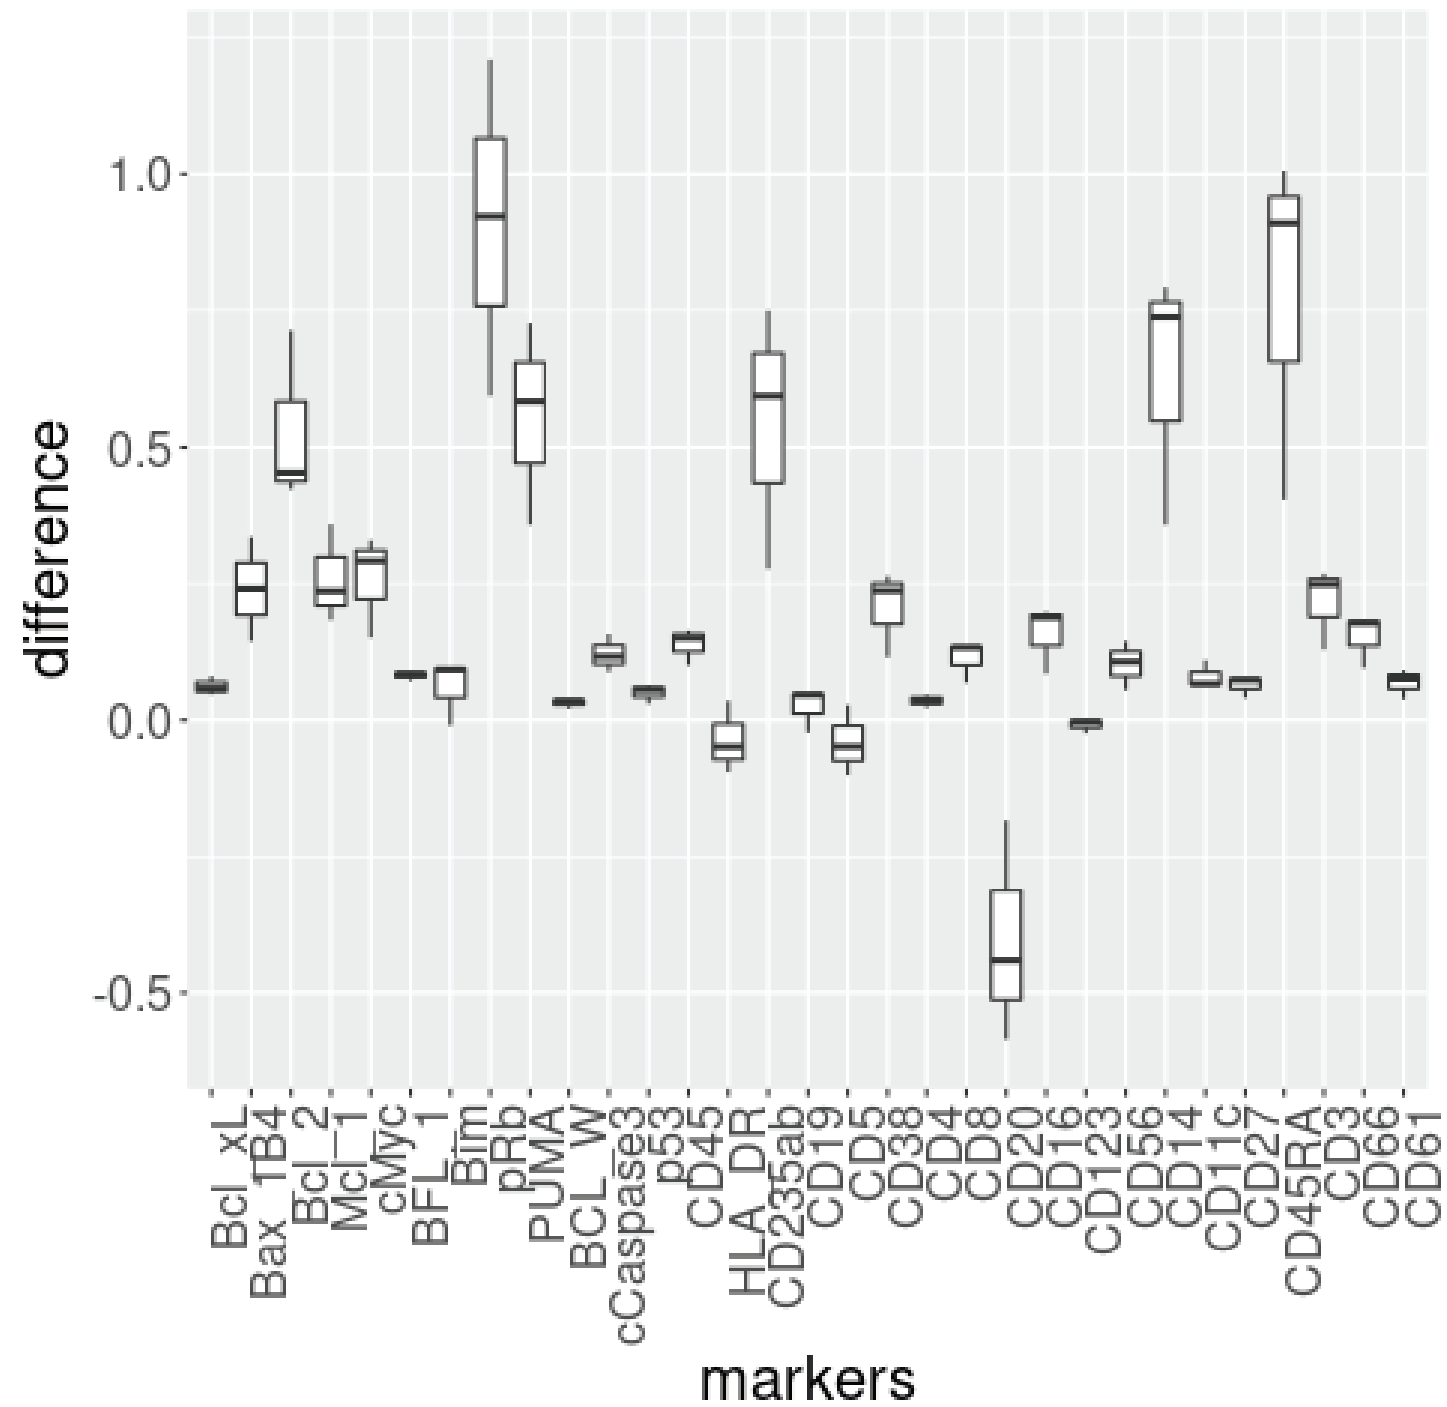

B

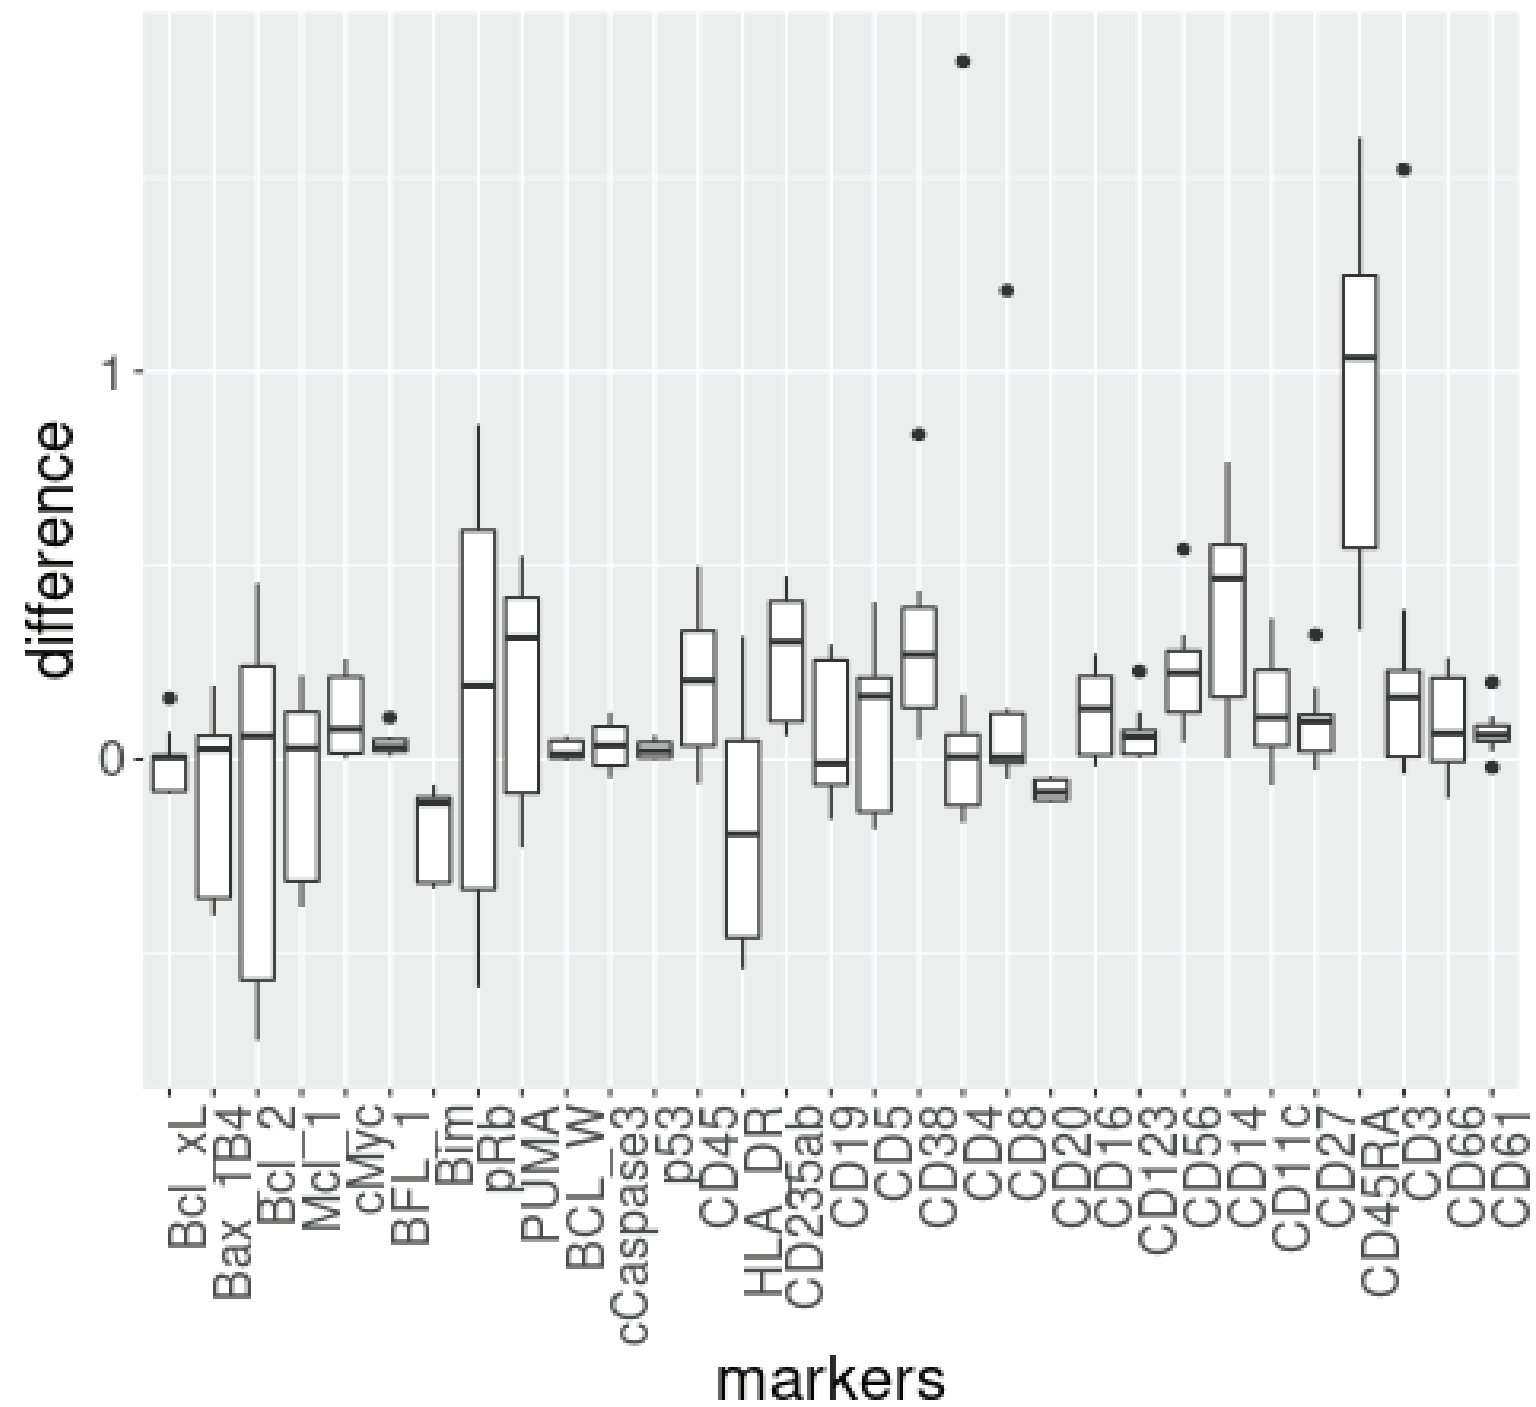

Supplement: supp [file elife_poa_e59630_Figure_3_figure_supplement_3.pdf › elife_poa_e59630_Figure_3_figure_supplement_3.pdf]

A

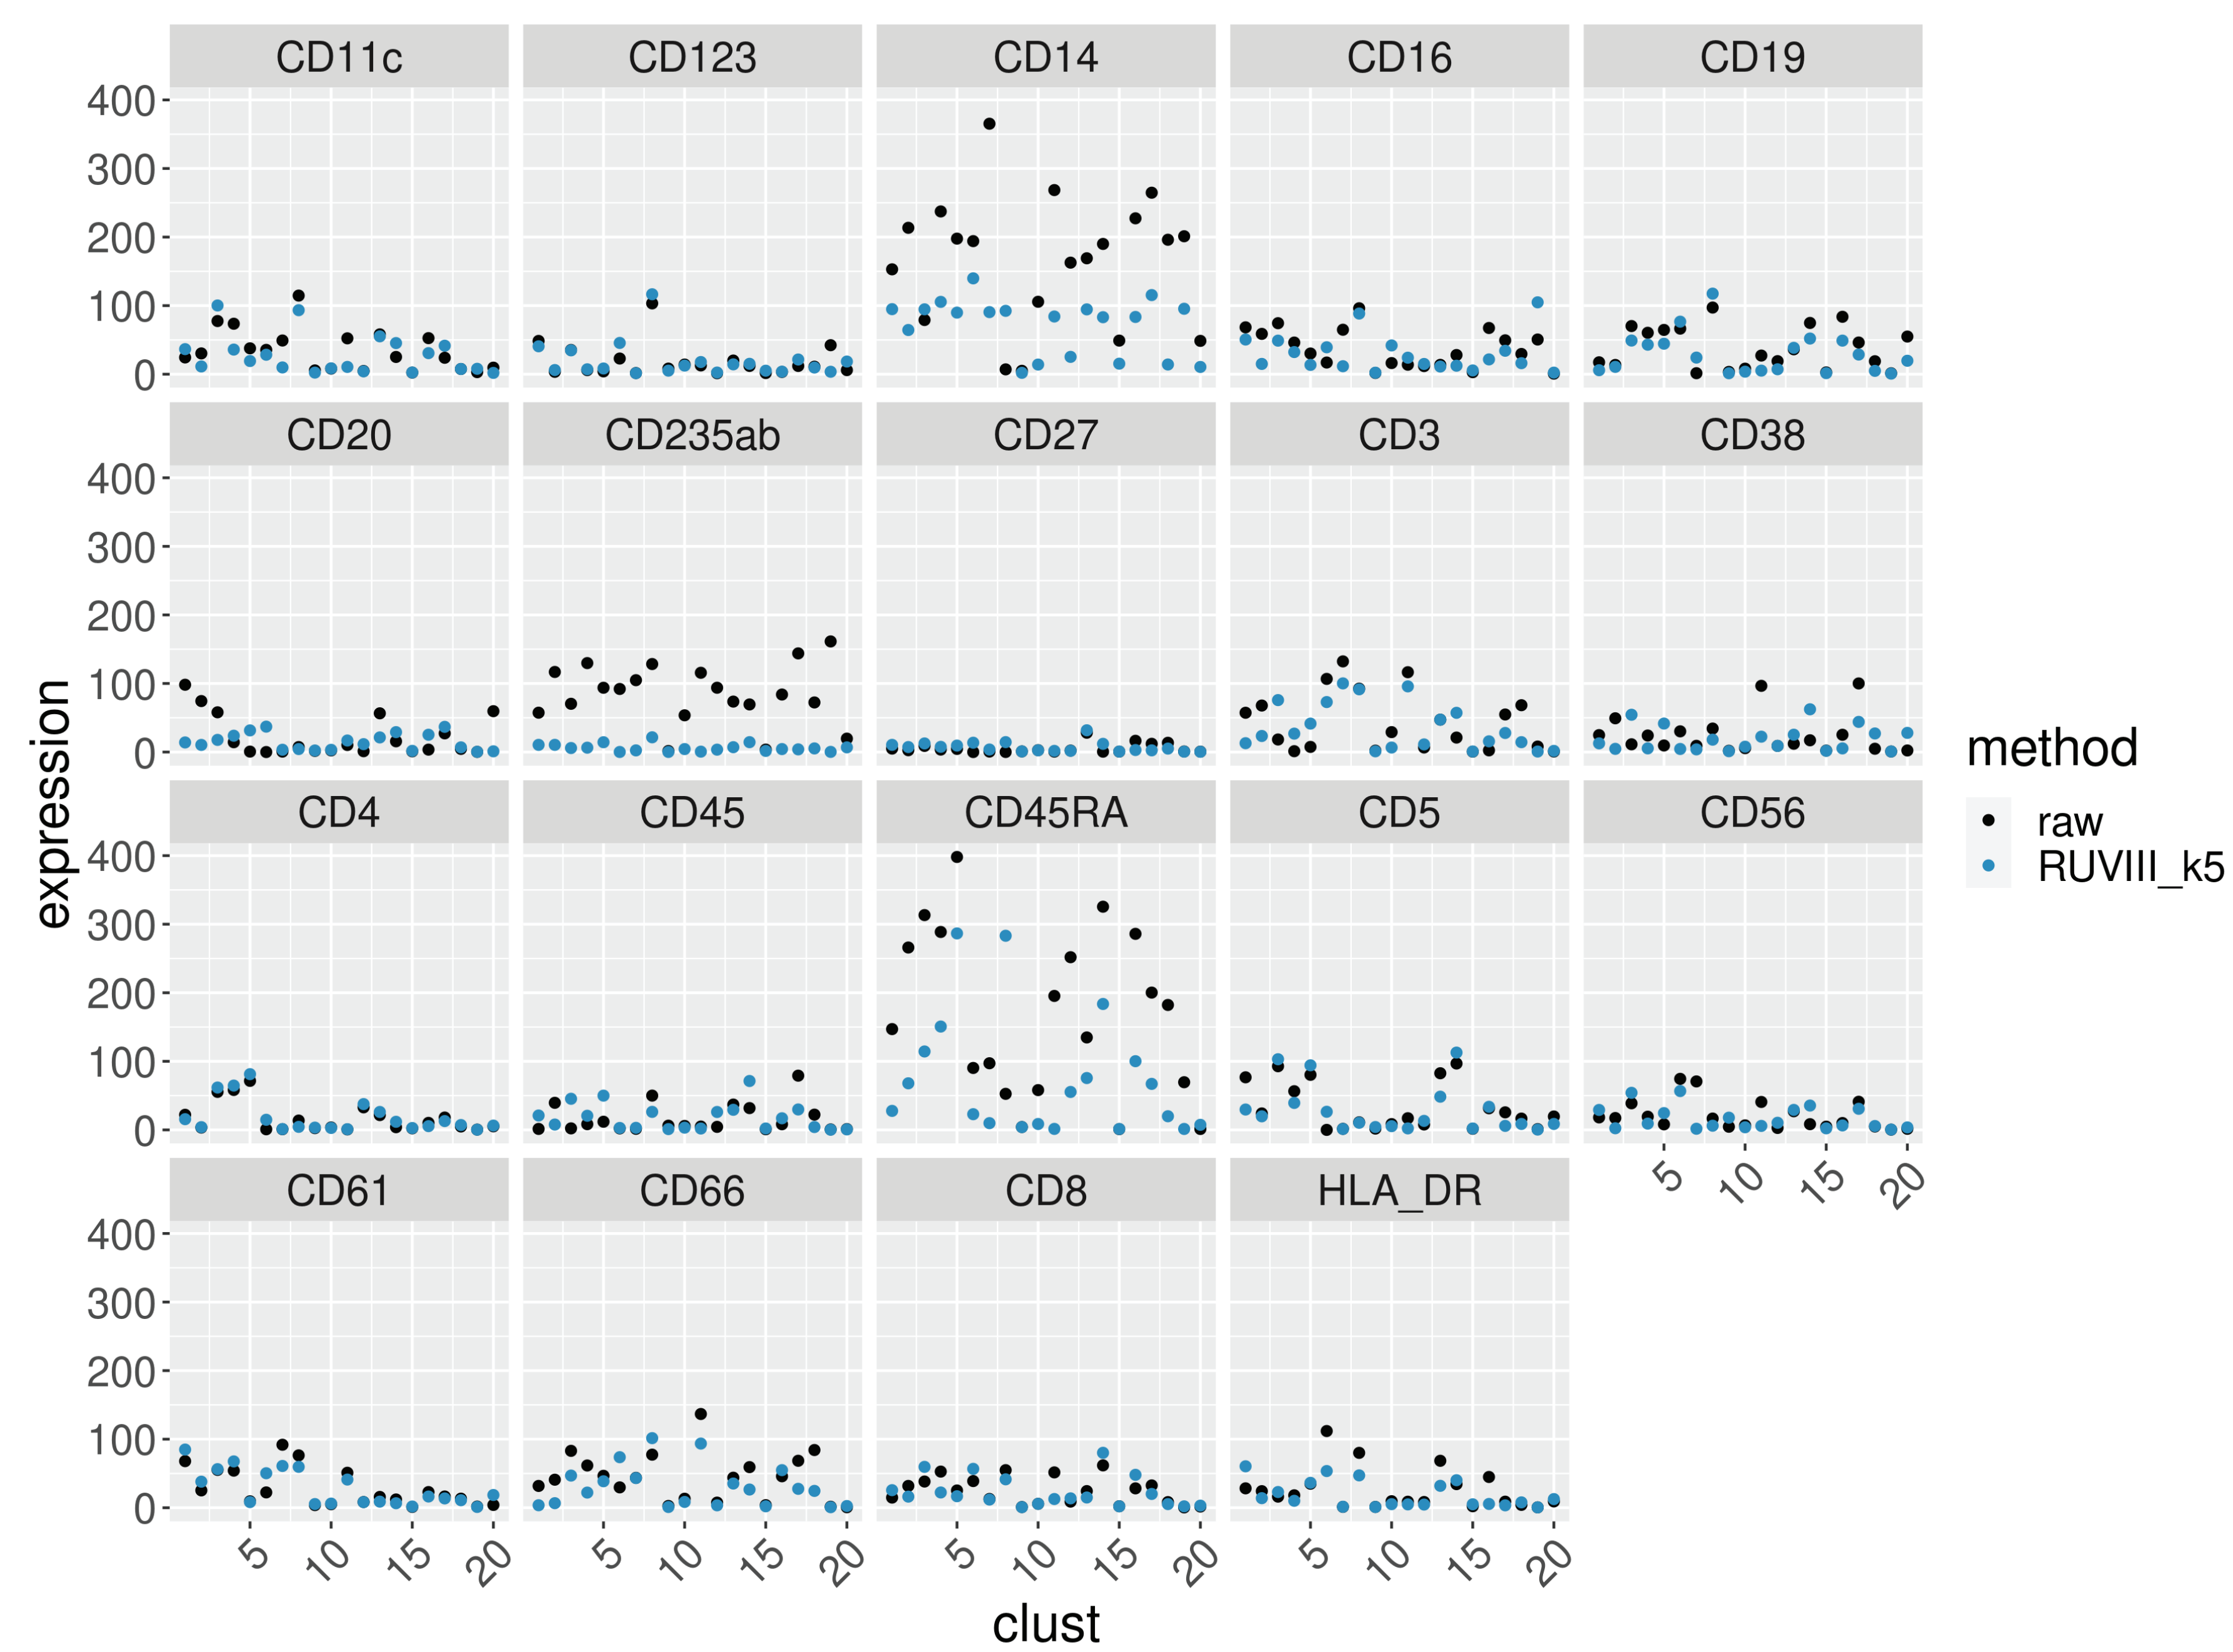

B

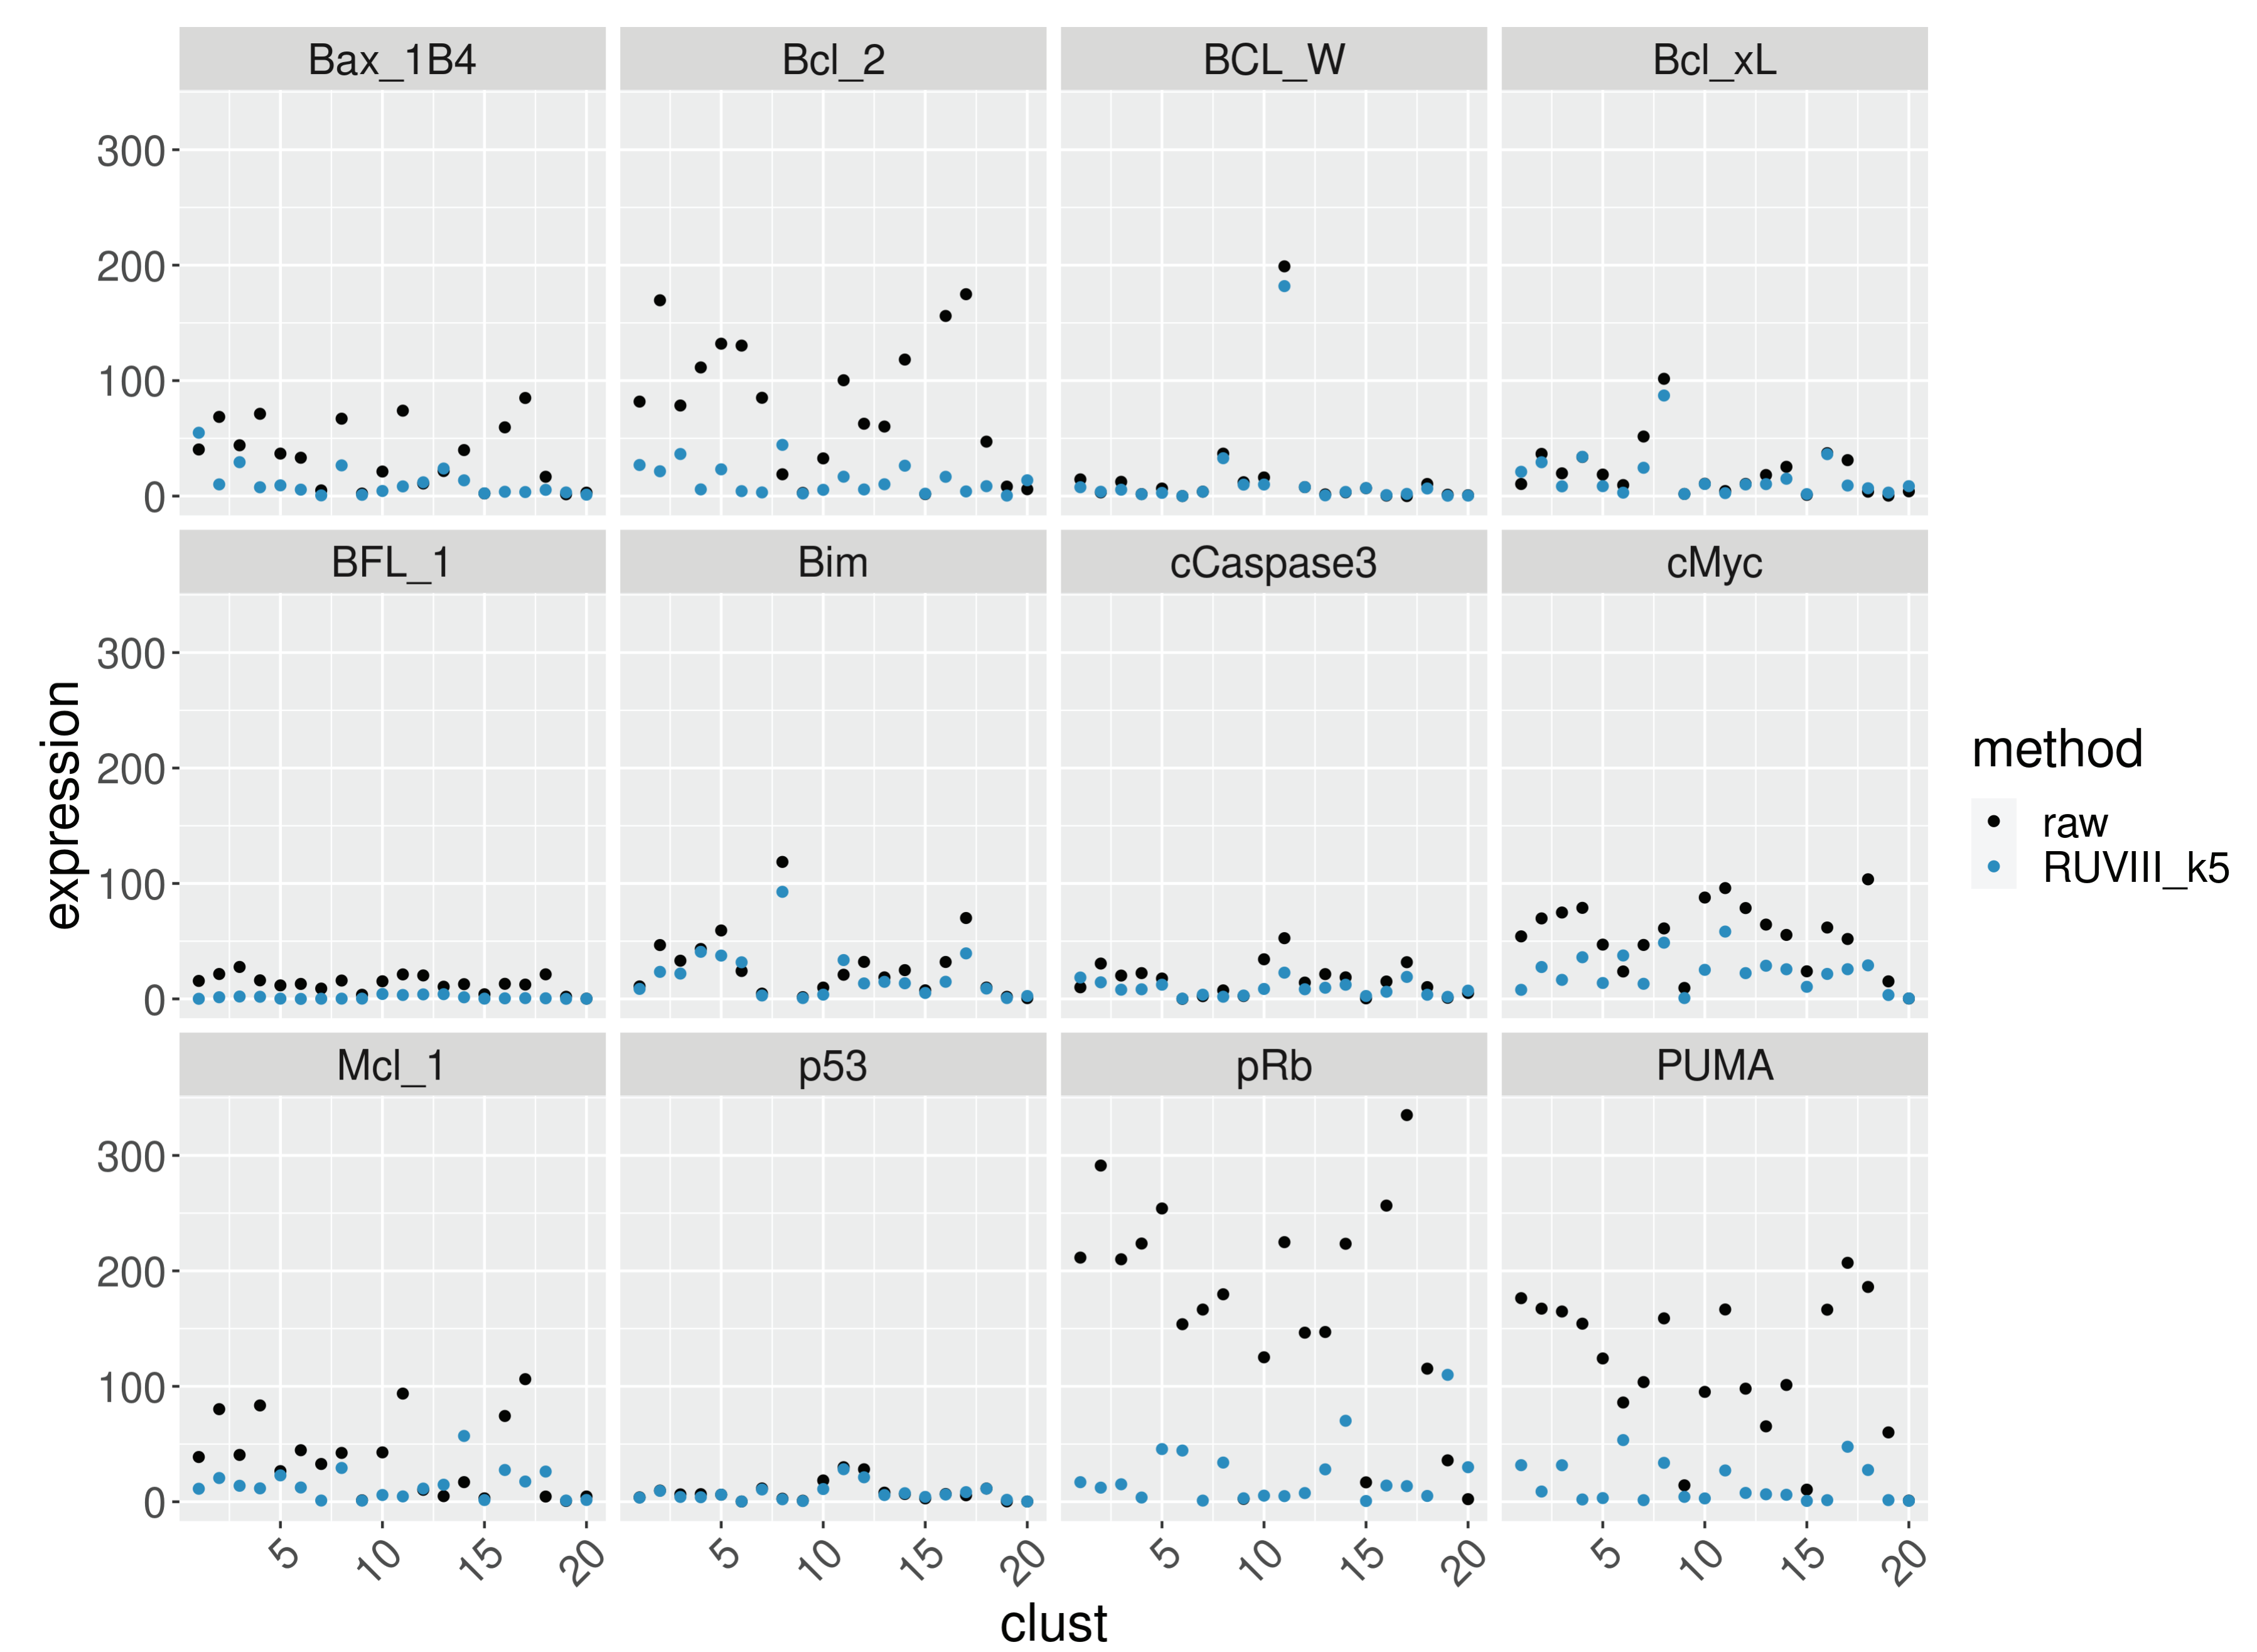

Supplement: supp [file elife_poa_e59630_Figure_5_figure_supplement_1.pdf › elife_poa_e59630_Figure_5_figure_supplement_1.pdf]

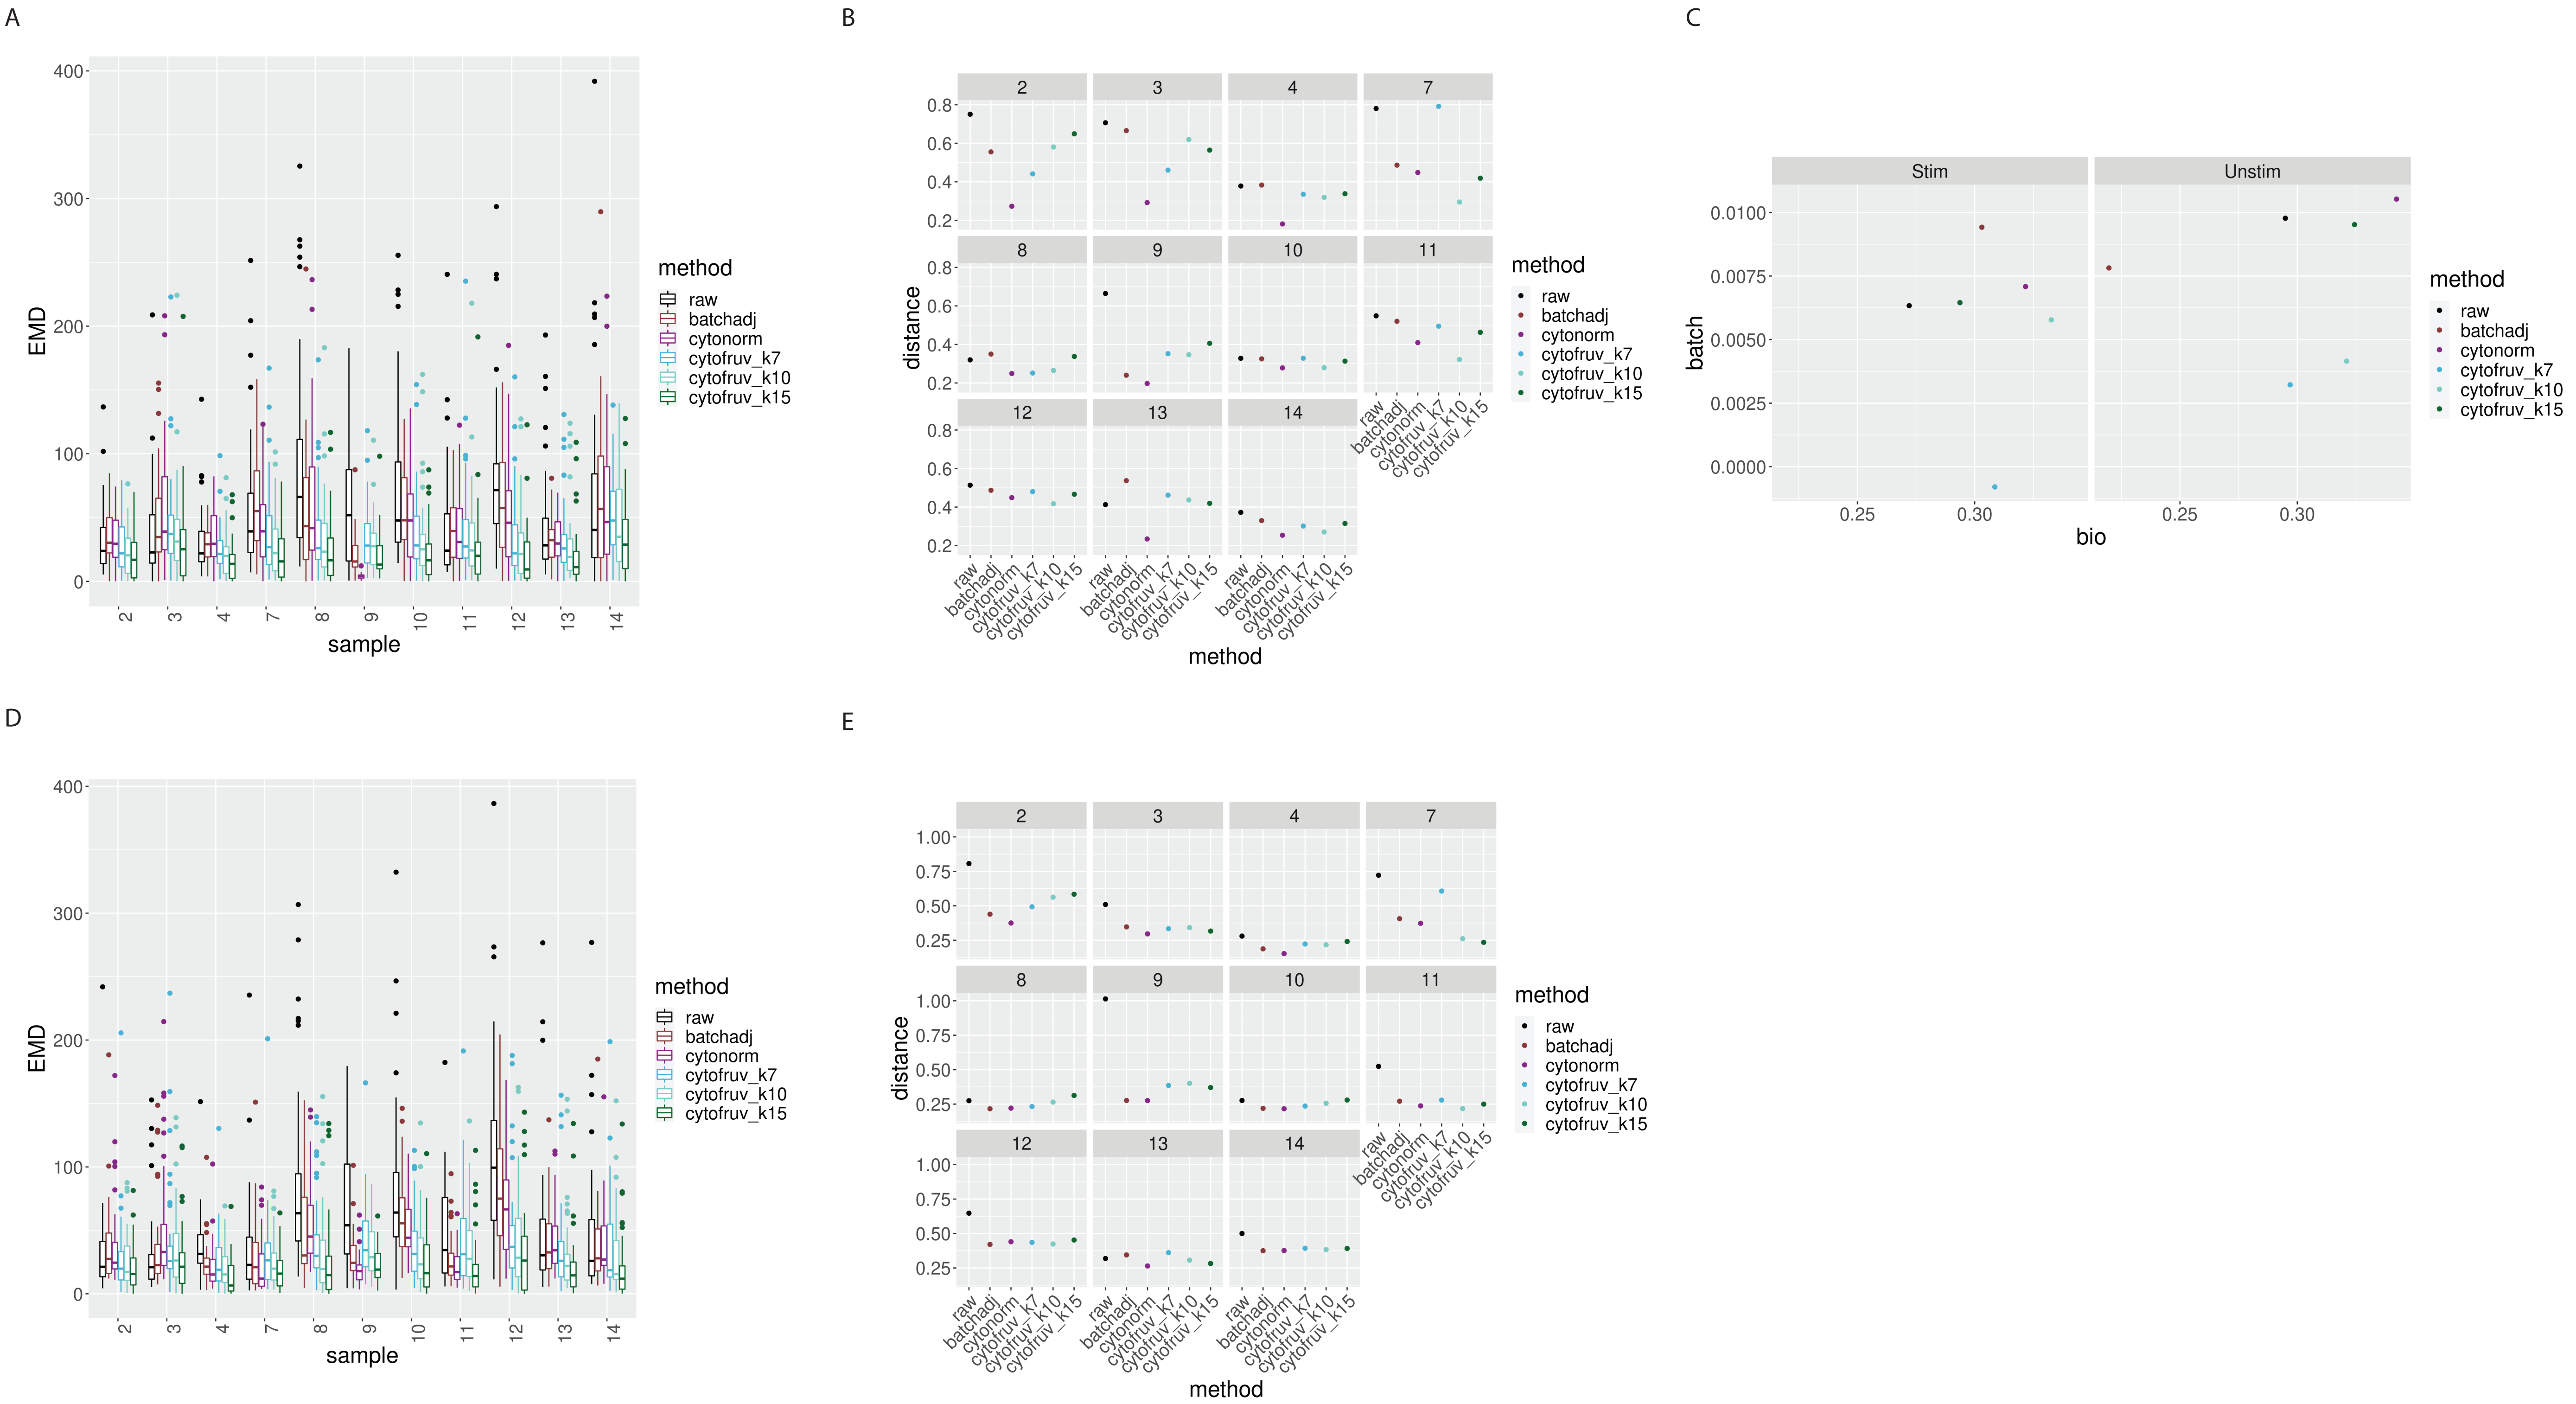

Supplement: supp [file elife_poa_e59630_Figure_6_figure_supplement_1.pdf › elife_poa_e59630_Figure_6_figure_supplement_1.pdf]

A

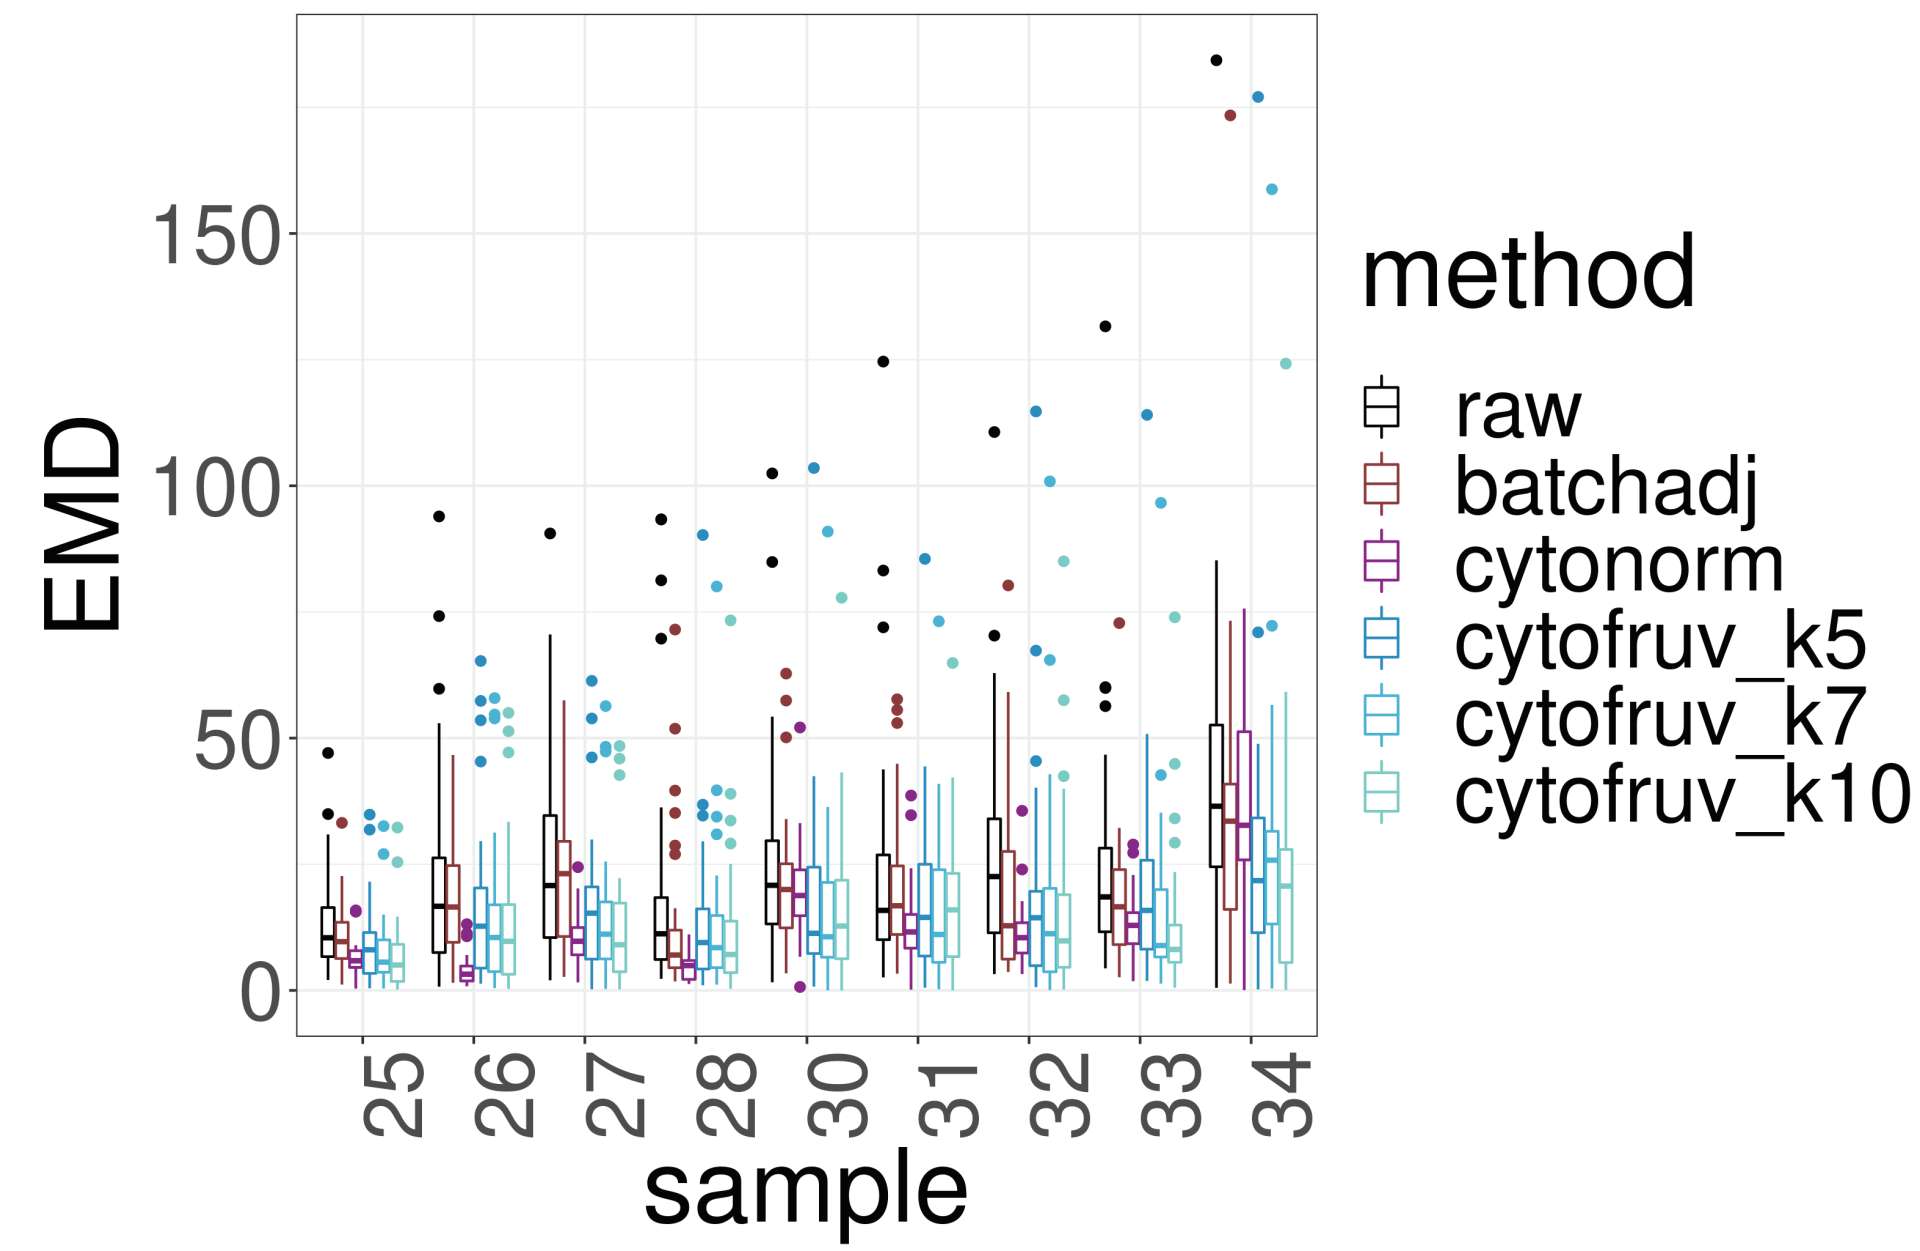

B

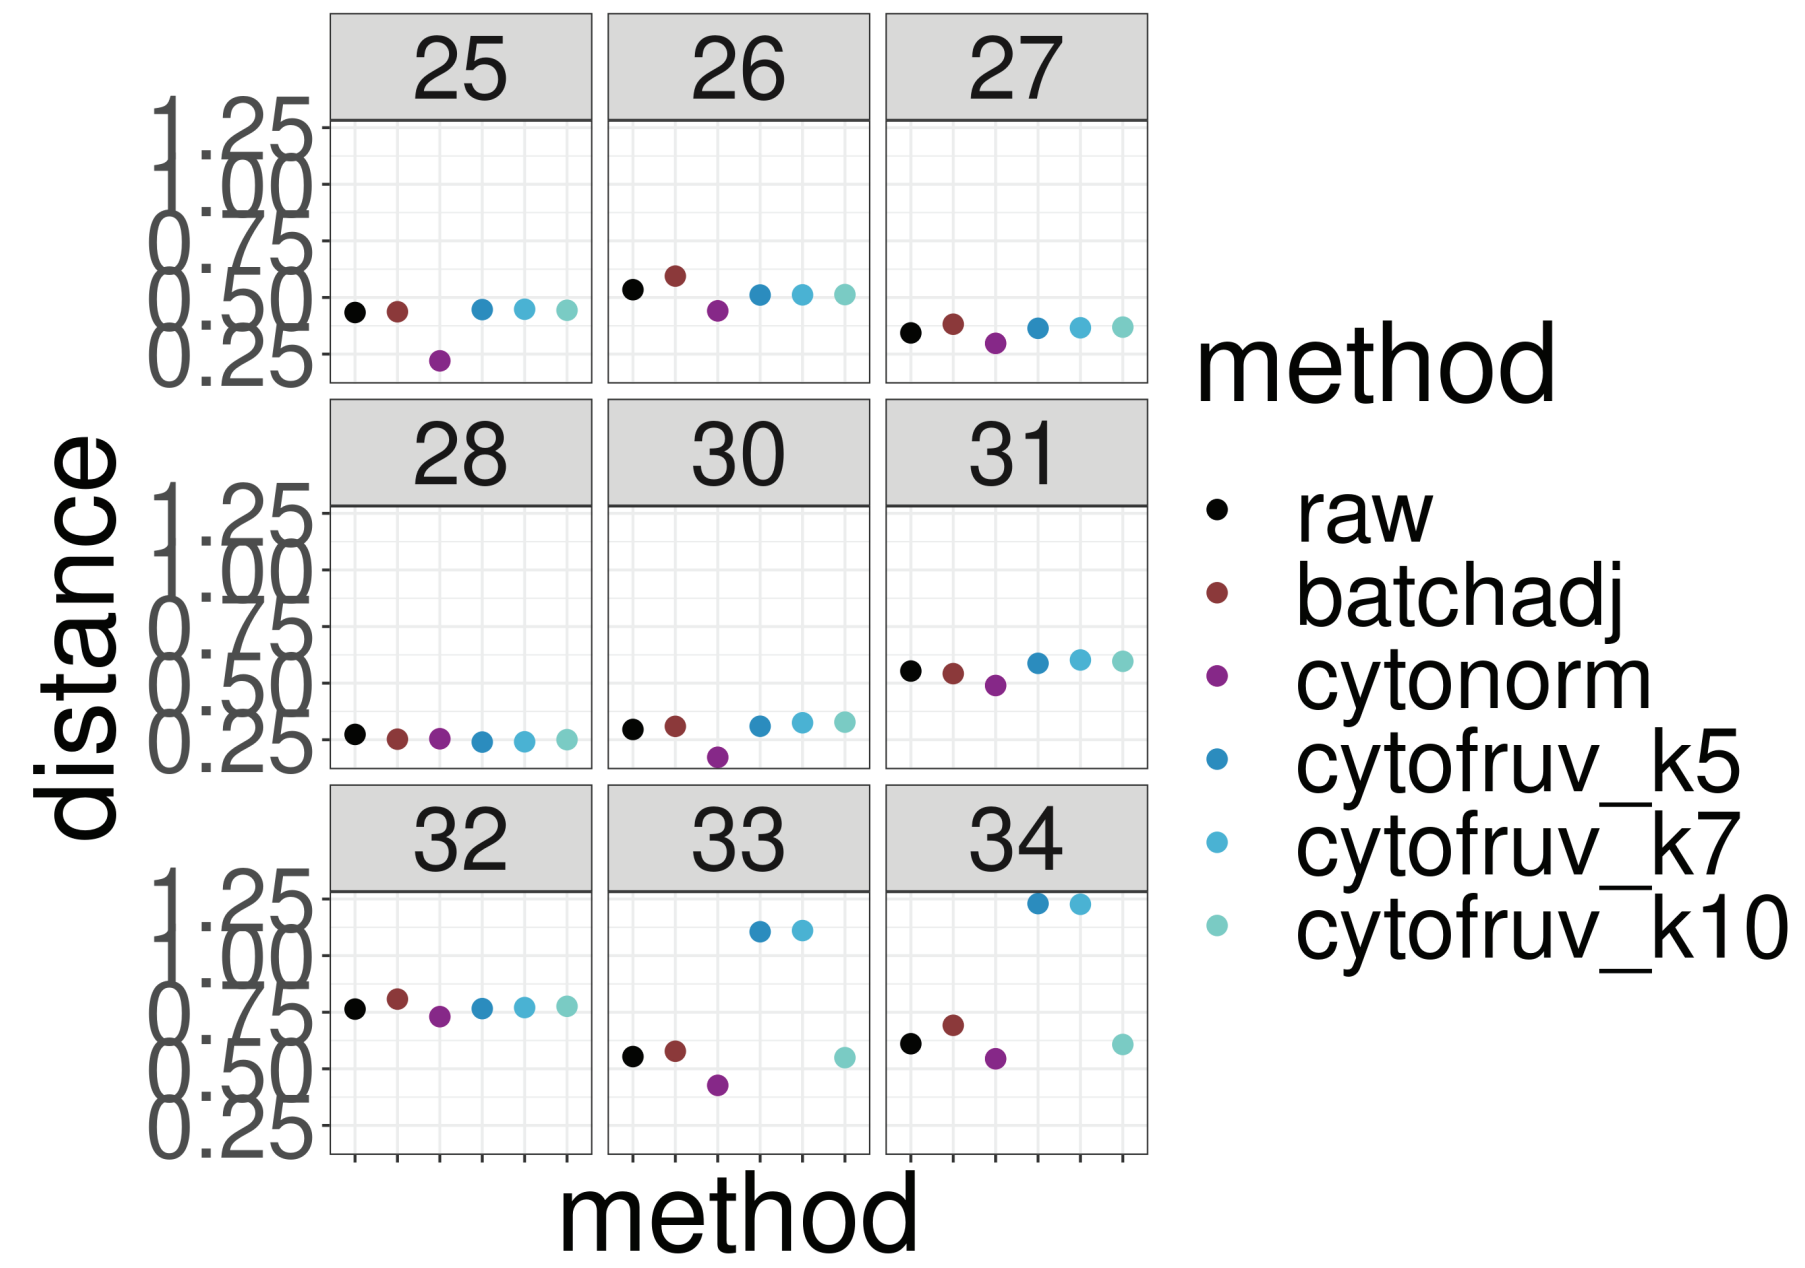

C

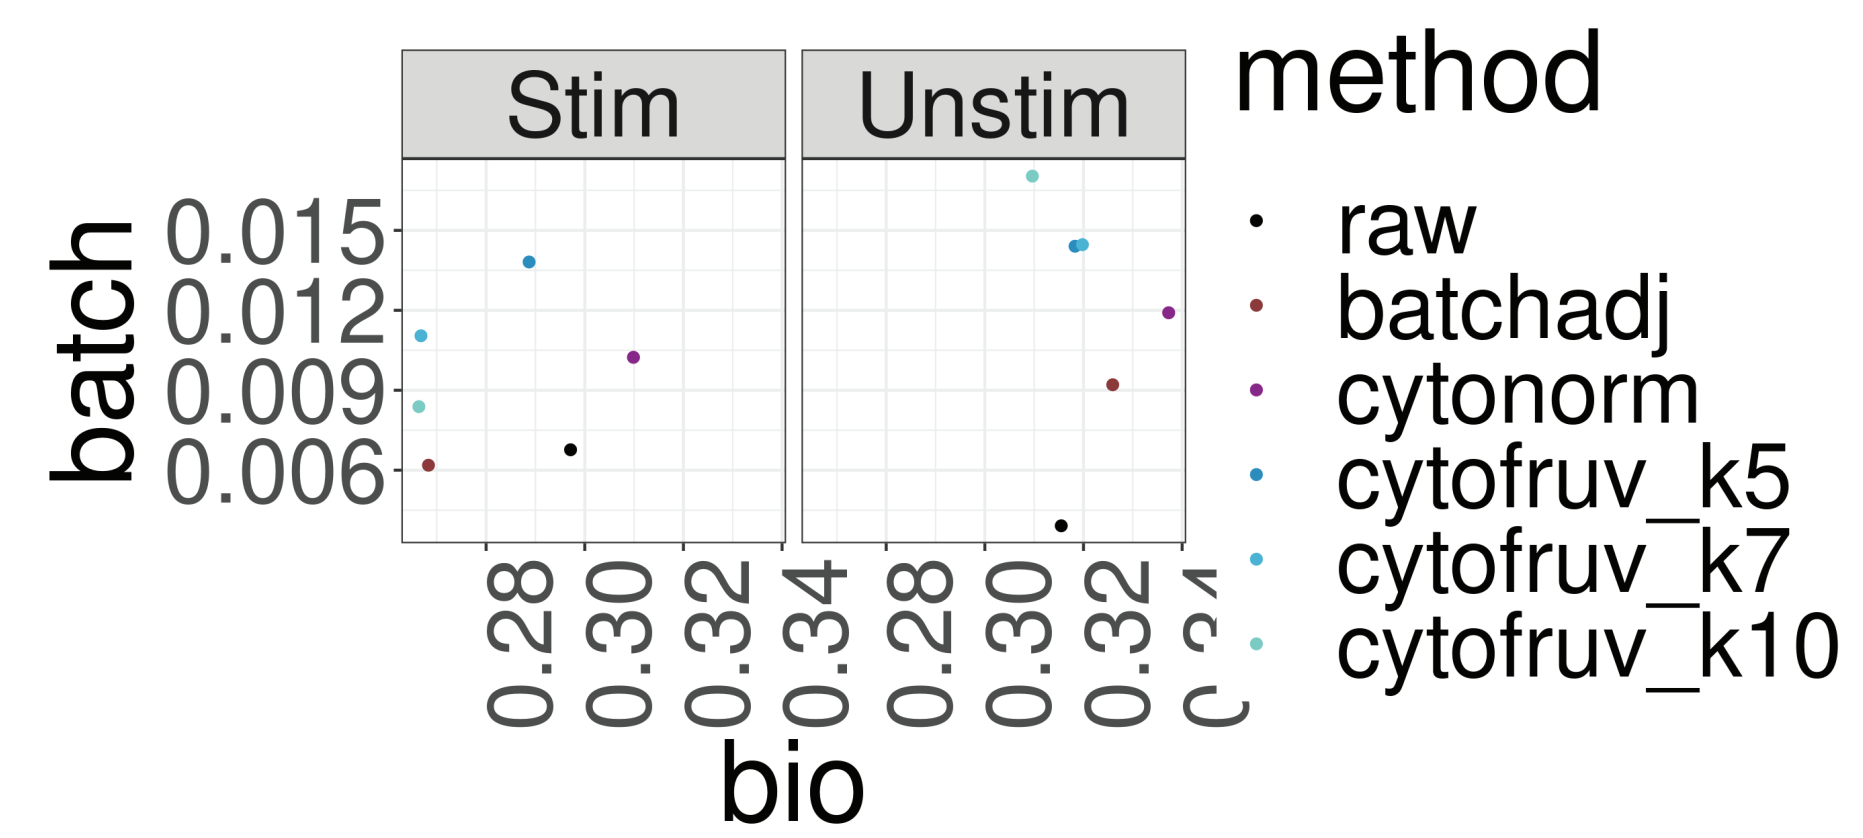

D

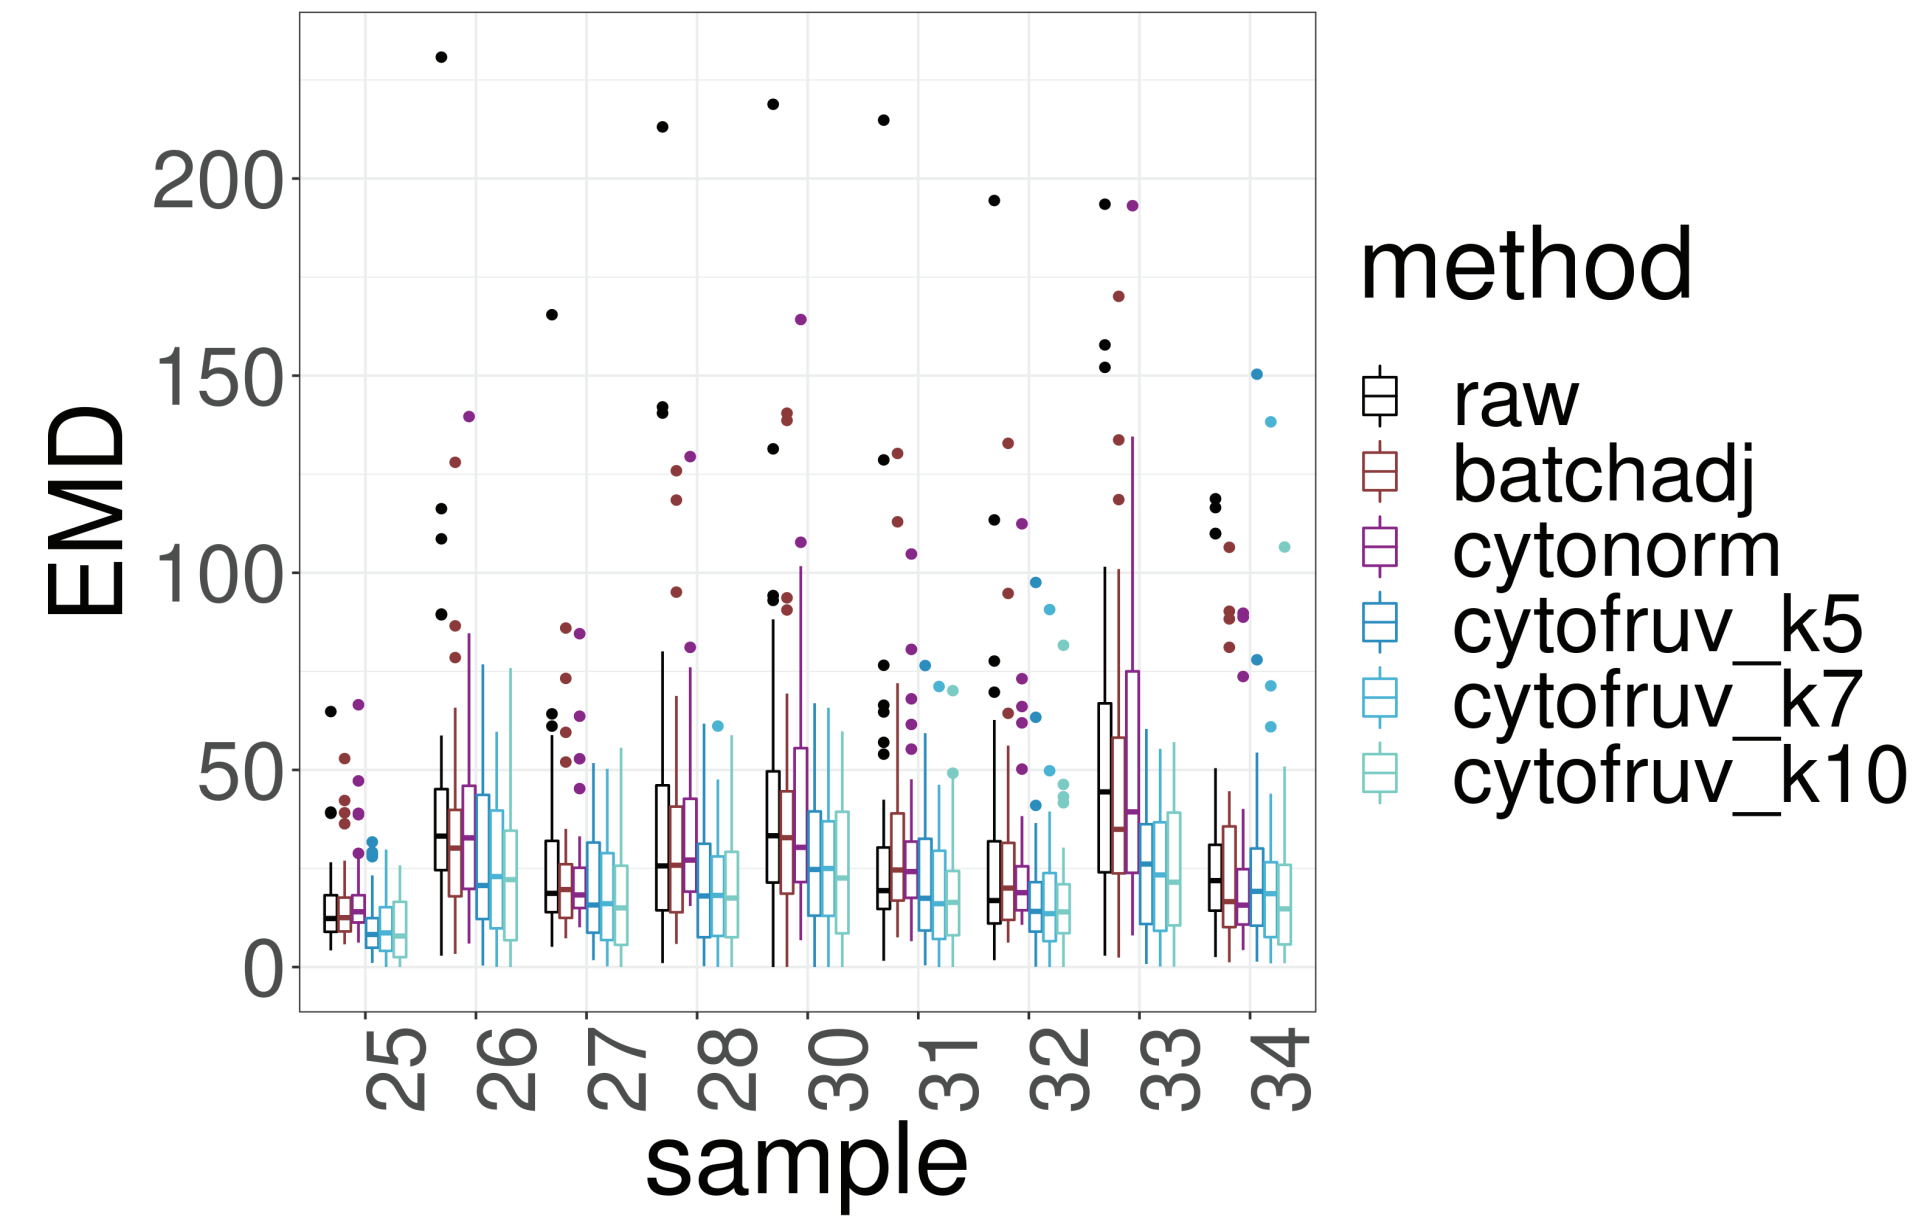

E

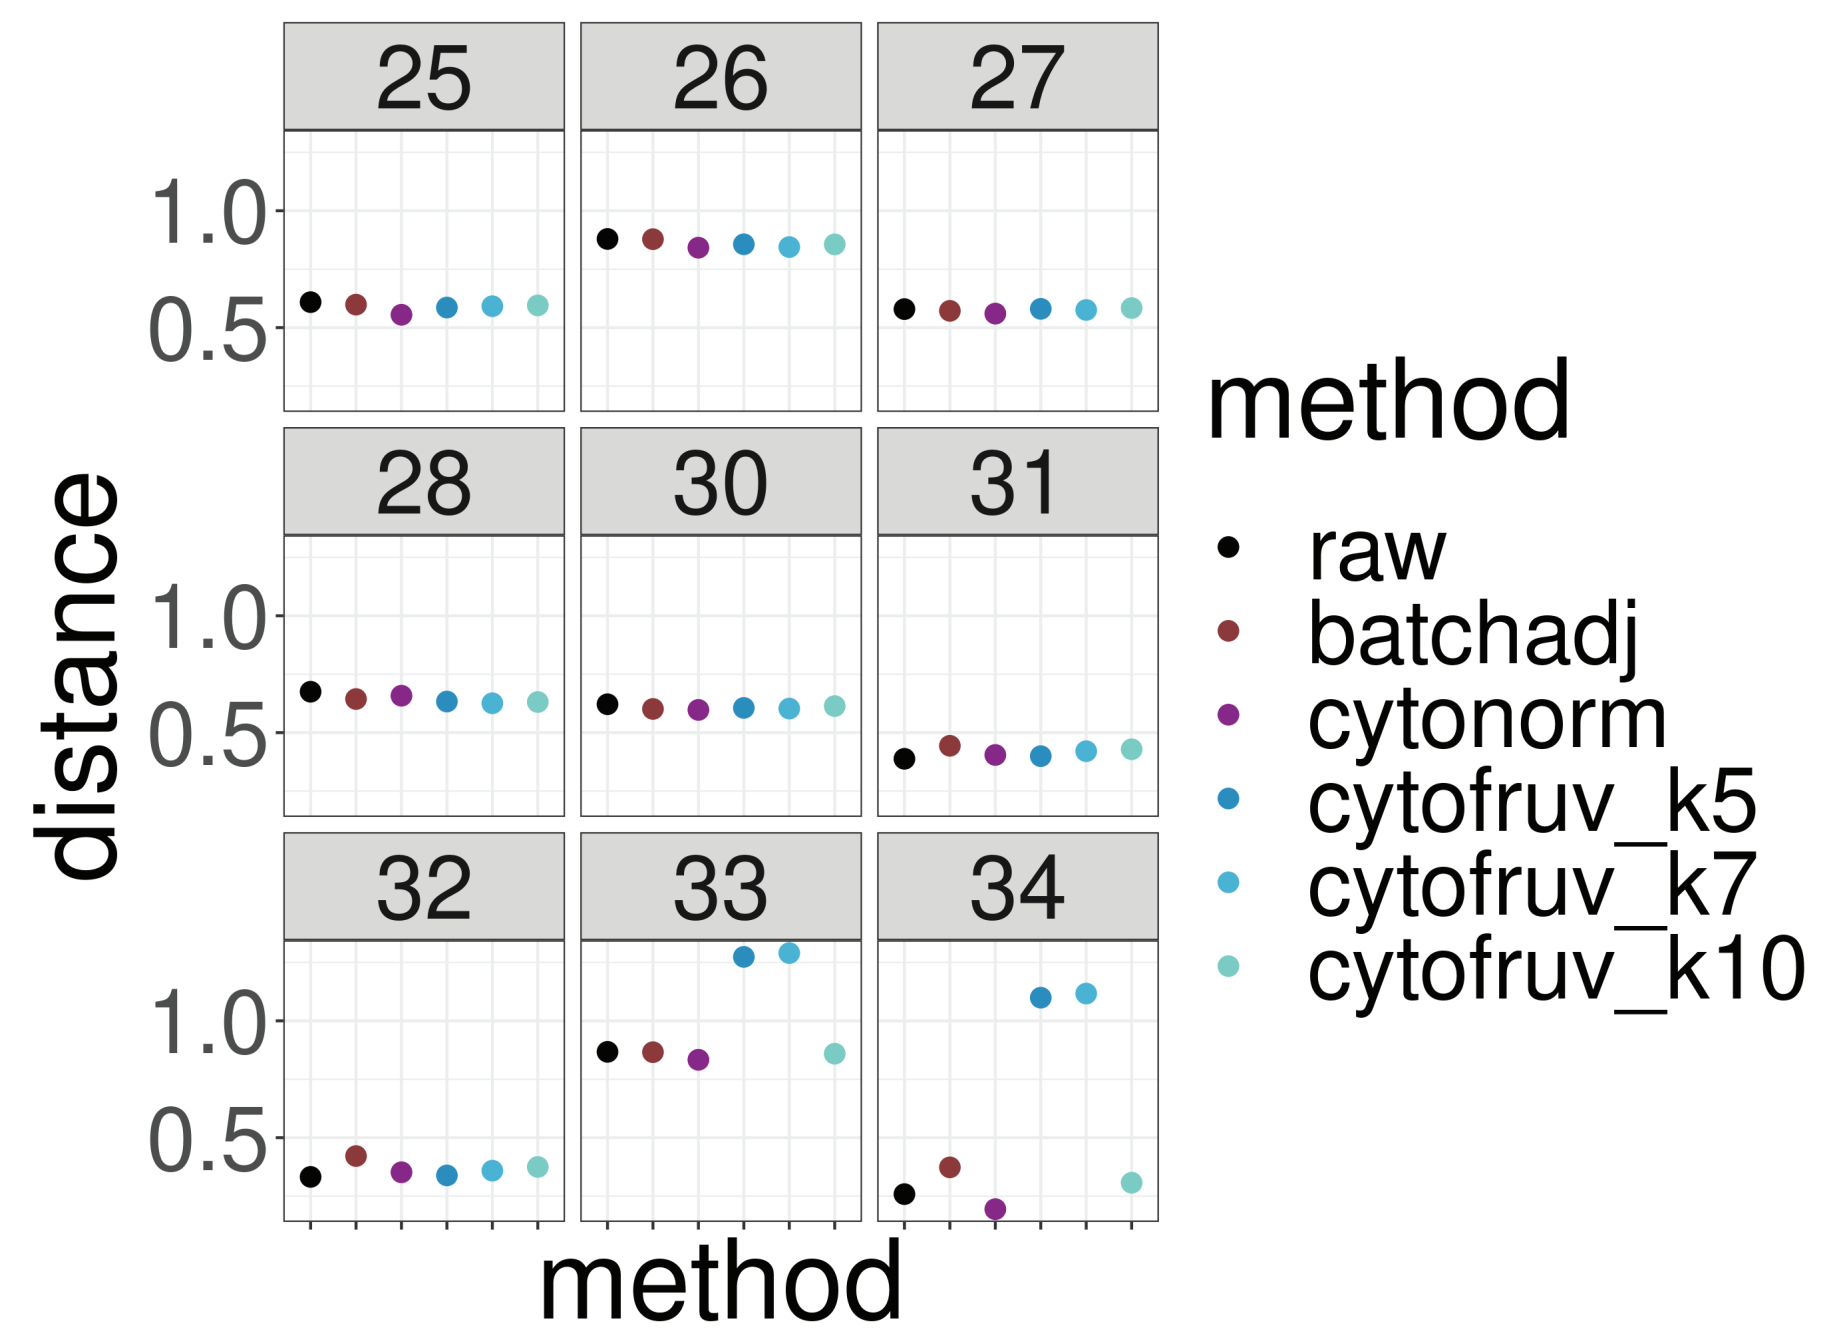

Supplement: supp [file elife_poa_e59630_Figure_6_figure_supplement_2.pdf › elife_poa_e59630_Figure_6_figure_supplement_2.pdf]

A

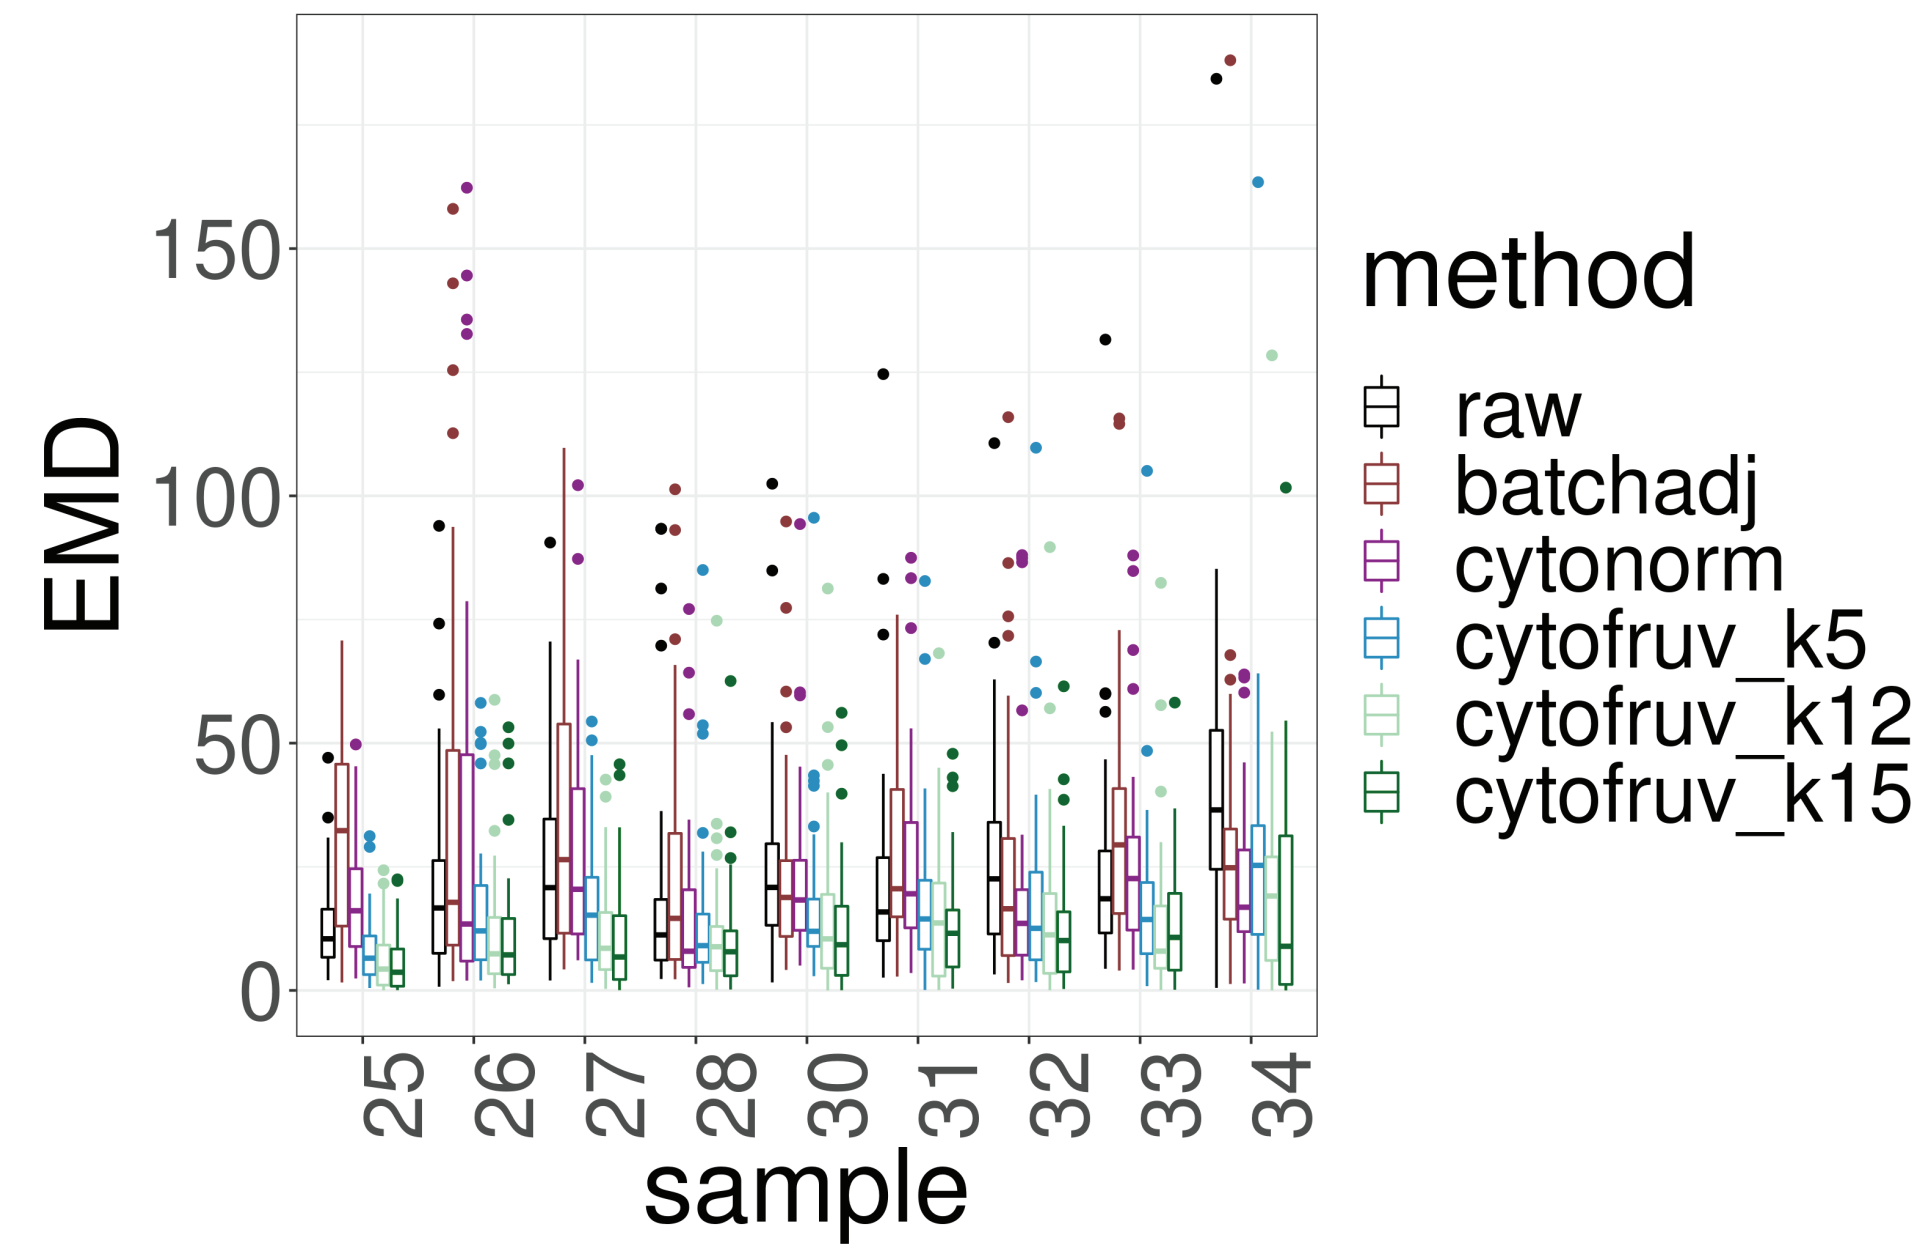

B

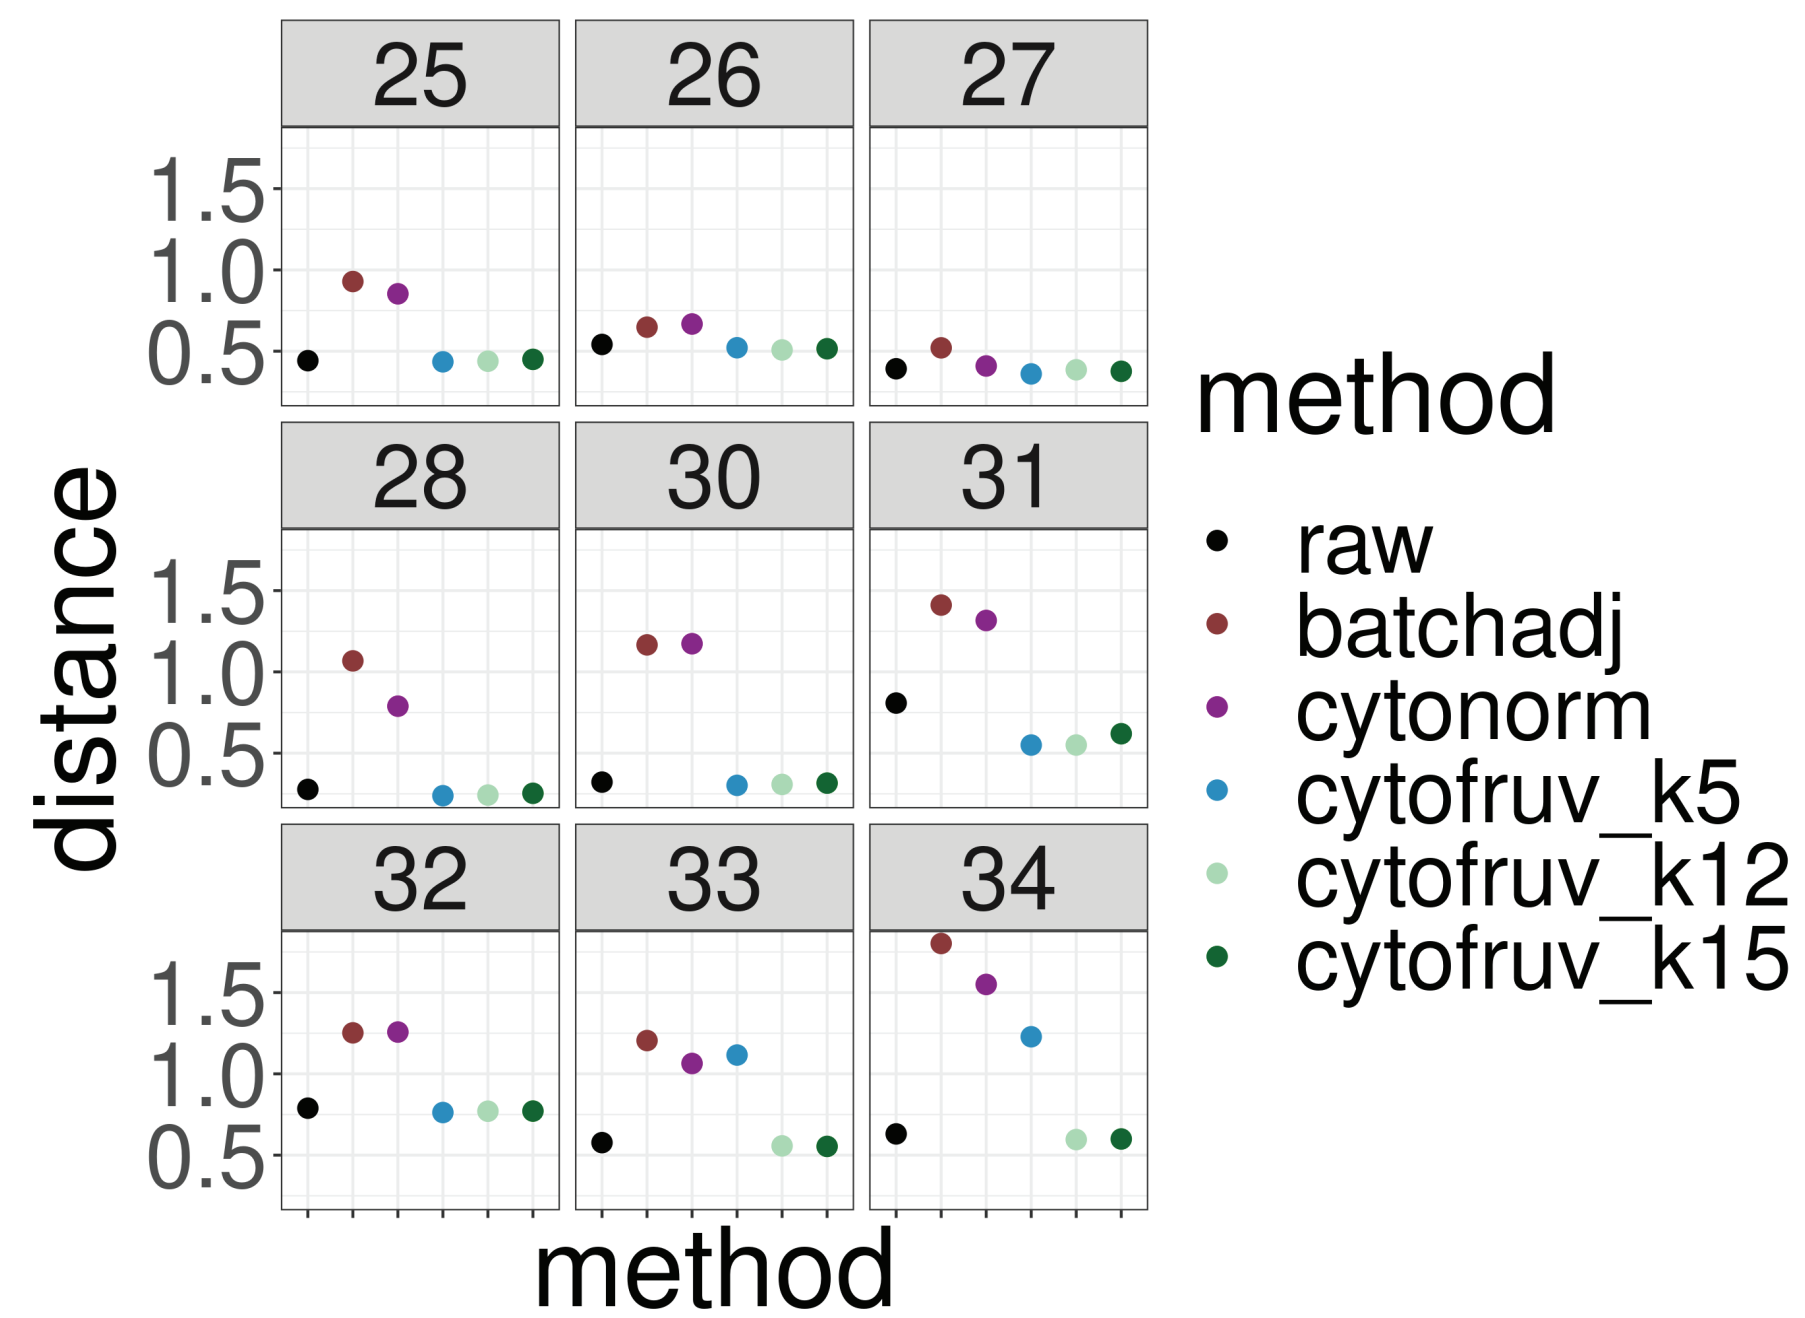

C

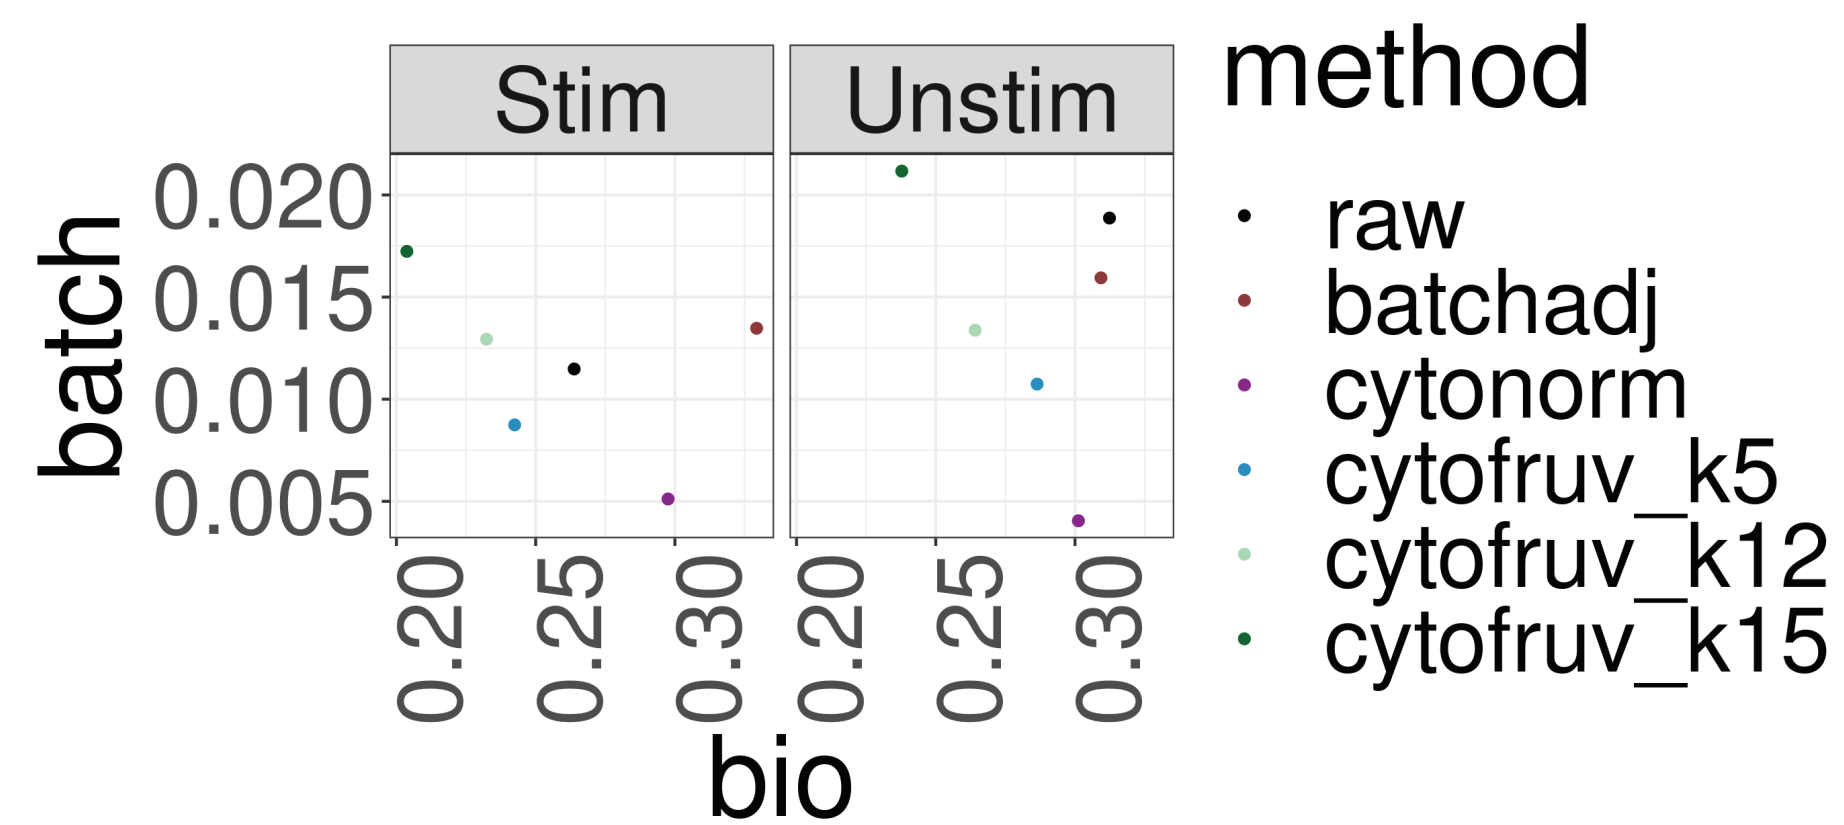

D

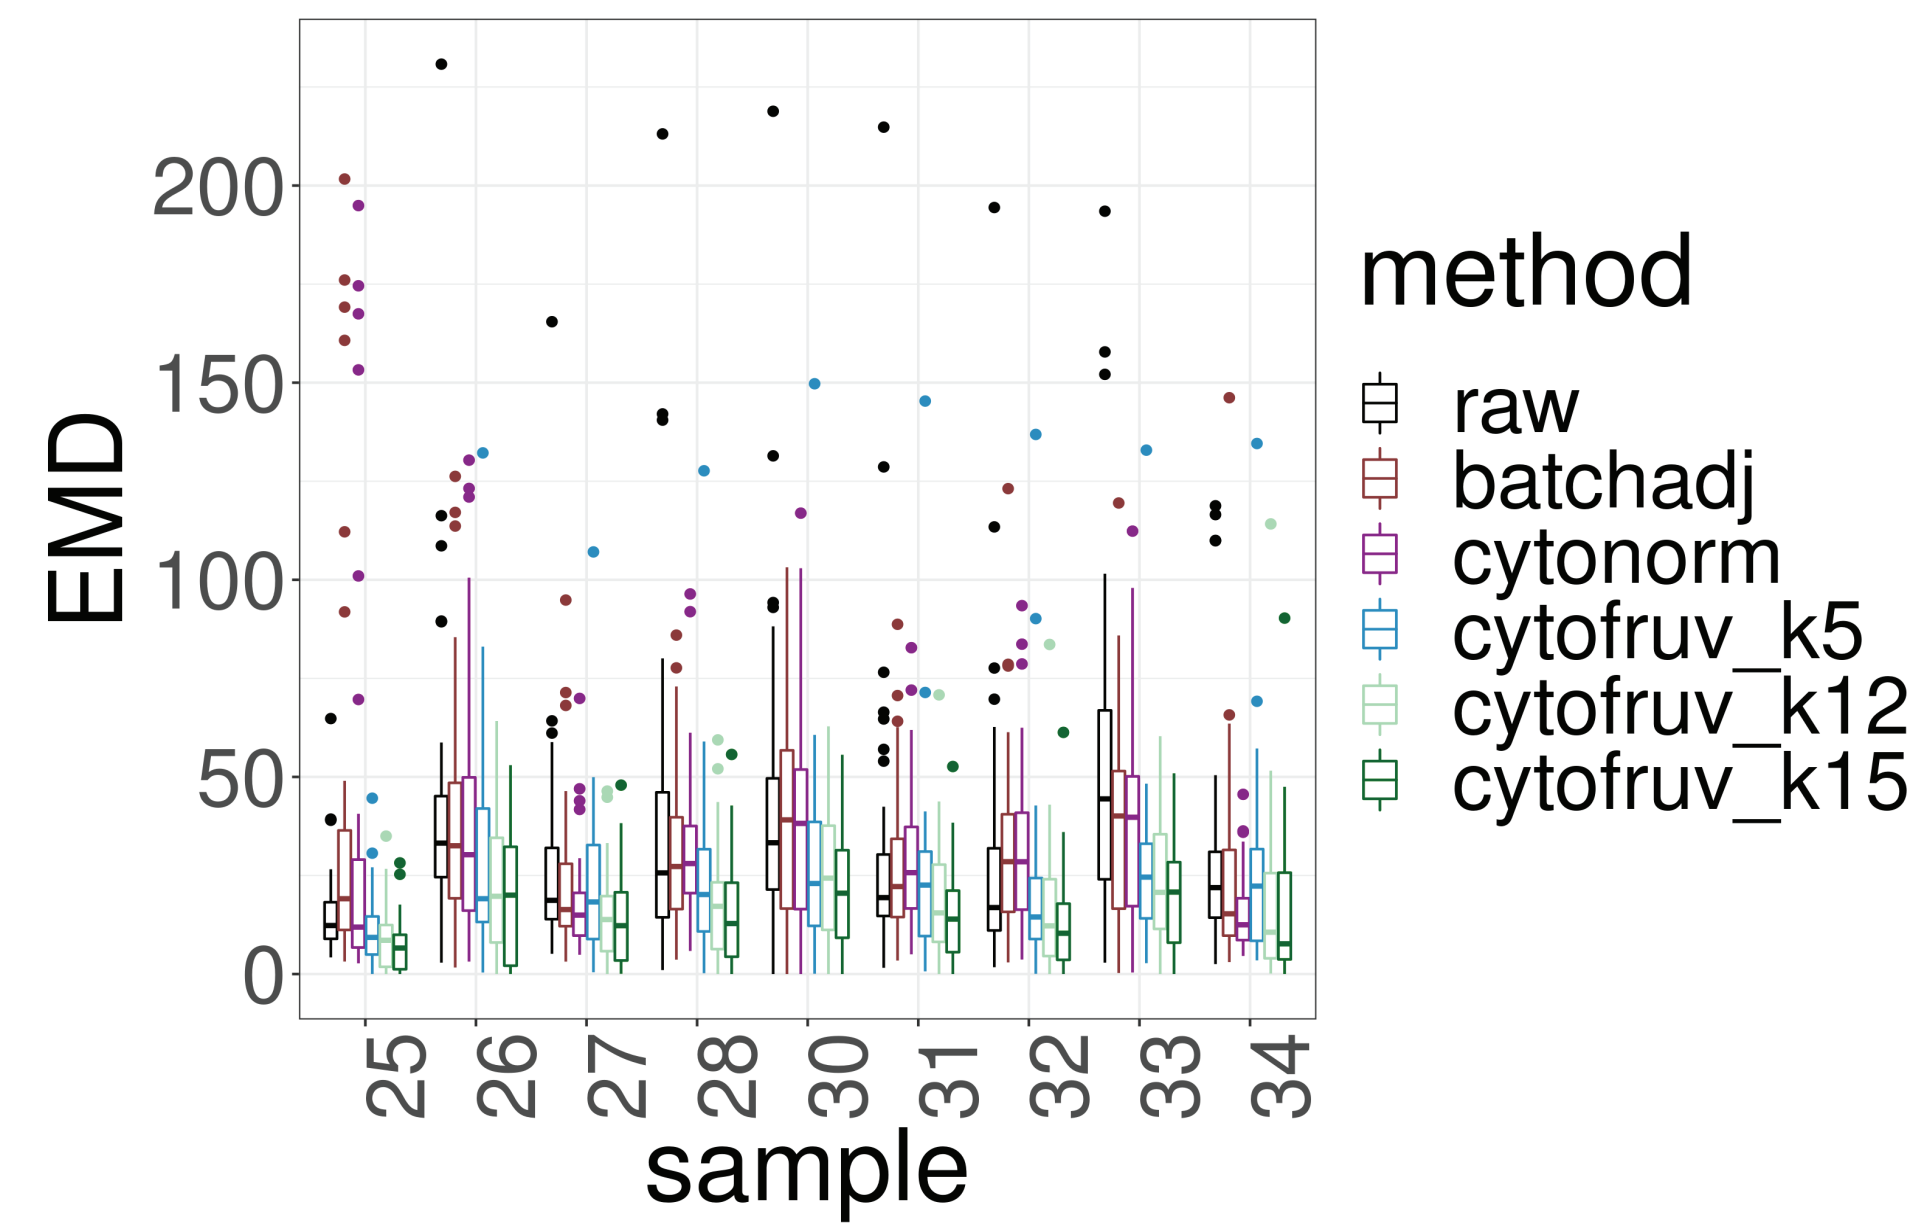

E

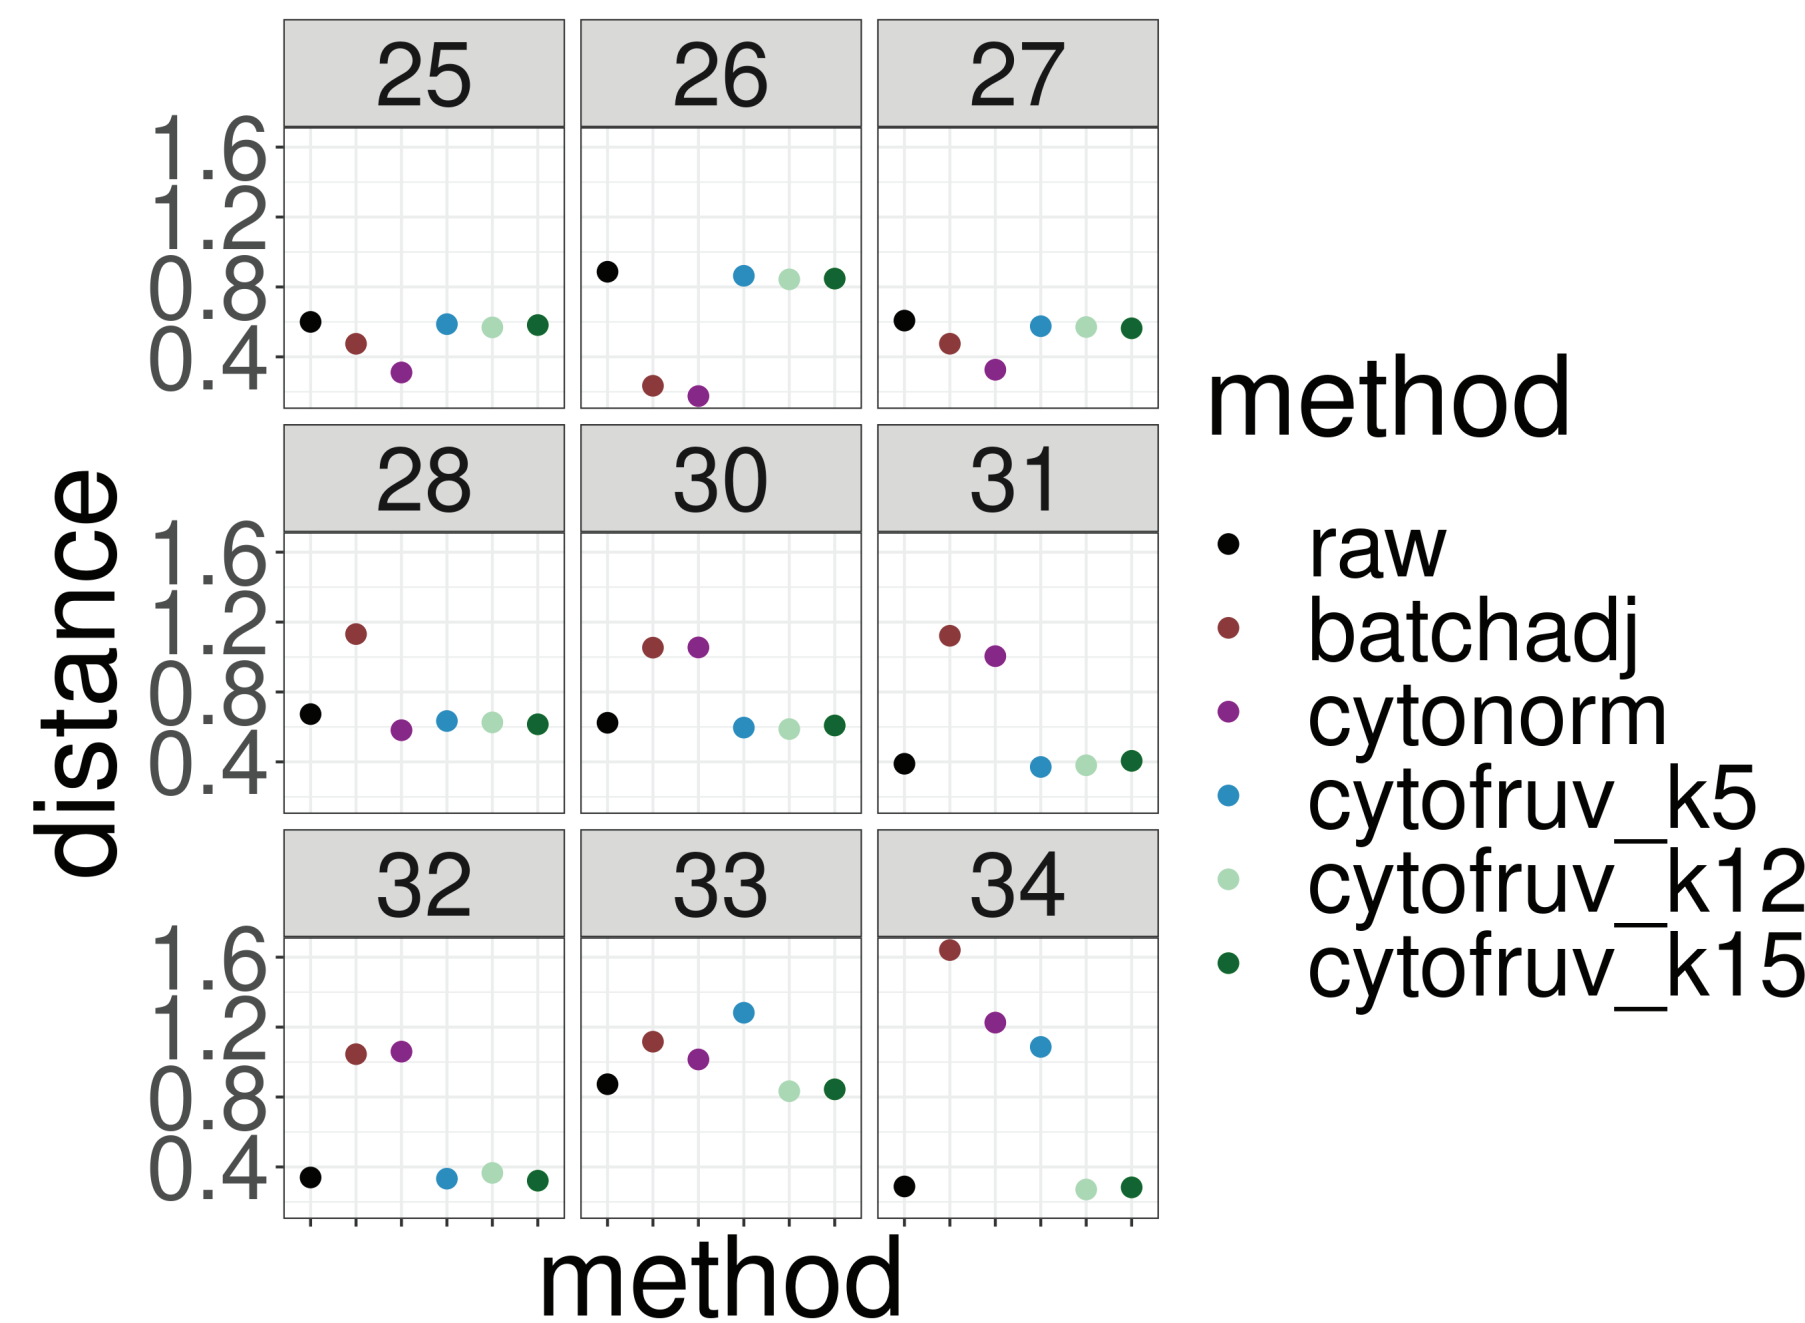

Supplement: supp [file elife_poa_e59630_Figure_6_figure_supplement_3.pdf › elife_poa_e59630_Figure_6_figure_supplement_3.pdf]
